# Supplementary material for: Site-selective remote C(sp3)–H heteroarylation of amides via organic photoredox catalysis
Source: PubMed Central journal article supplement (PMC6800443; doi:10.1038/s41467-019-12722-4), 2019-10-18
Supplement: 41467_2019_12722_MOESM3_ESM.pdf [file 41467_2019_12722_MOESM3_ESM.pdf]

## Description of Additional Supplementary Files

File Name: Supplementary Data 1

Description: Coordinates and energies of DFT-computed stationary points
