# Supplementary material for: Site-selective remote C(sp3)–H heteroarylation of amides via organic photoredox catalysis
Source: PubMed Central journal article supplement (PMC6800443; doi:10.1038/s41467-019-12722-4), 2019-10-18
Supplement: 41467_2019_12722_MOESM4_ESM.pdf [file 41467_2019_12722_MOESM4_ESM.pdf]

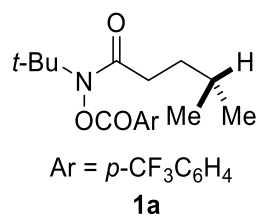

|                                              |             |             |                             |
|----------------------------------------------|-------------|-------------|-----------------------------|
| Zero-point correction=                       |             |             | 0.402393 (Hartree/Particle) |
| Thermal correction to Energy=                |             |             | 0.427925                    |
| Thermal correction to Enthalpy=              |             |             | 0.428869                    |
| Thermal correction to Gibbs Free Energy=     |             |             | 0.344610                    |
| Sum of electronic and zero-point Energies=   |             |             | -1278.469746                |
| Sum of electronic and thermal Energies=      |             |             | -1278.444214                |
| Sum of electronic and thermal Enthalpies=    |             |             | -1278.443270                |
| Sum of electronic and thermal Free Energies= |             |             | -1278.527529                |
| N                                            | -2.25748900 | -0.85386200 | 0.04054700                  |
| C                                            | -2.97828000 | -0.12817600 | -0.87126100                 |
| C                                            | -2.27879700 | 1.05247300  | -1.52040100                 |
| O                                            | -4.14586300 | -0.39599500 | -1.09616600                 |
| C                                            | -2.03829000 | 2.20800800  | -0.53842200                 |
| C                                            | -3.26228800 | 2.60771200  | 0.29260400                  |
| C                                            | -2.90234500 | 3.75700400  | 1.23049200                  |
| C                                            | -4.45813600 | 2.96923300  | -0.58594000                 |
| C                                            | -2.76447200 | -2.00567700 | 0.84151800                  |
| C                                            | -1.63422600 | -2.52912000 | 1.72675100                  |
| C                                            | -3.23213600 | -3.11842300 | -0.10017200                 |
| C                                            | -3.91122900 | -1.51291200 | 1.72868000                  |
| H                                            | -2.94481900 | 1.36768300  | -2.33341400                 |
| H                                            | -1.32728100 | 0.74575500  | -1.97946000                 |
| H                                            | -1.69981200 | 3.08232900  | -1.11985900                 |
| H                                            | -1.21328600 | 1.94580400  | 0.14154200                  |
| H                                            | -3.54571800 | 1.73916800  | 0.91605600                  |

|   |             |             |             |
|---|-------------|-------------|-------------|
| H | -3.75029500 | 4.02373400  | 1.87902800  |
| H | -2.62394900 | 4.65457400  | 0.65433600  |
| H | -2.05036600 | 3.49591500  | 1.87680200  |
| H | -5.30221200 | 3.32063200  | 0.02694600  |
| H | -4.80515800 | 2.10391200  | -1.16846700 |
| H | -4.19325400 | 3.77751600  | -1.28805200 |
| H | -2.03968800 | -3.34480900 | 2.34068500  |
| H | -1.24597700 | -1.75146800 | 2.39822000  |
| H | -0.80270400 | -2.94070400 | 1.13576900  |
| H | -3.57132600 | -3.97996900 | 0.49331900  |
| H | -2.40354900 | -3.43773200 | -0.74727900 |
| H | -4.06239400 | -2.77413100 | -0.72885500 |
| H | -4.30829300 | -2.35504700 | 2.31390600  |
| H | -4.72319400 | -1.09456600 | 1.12132600  |
| H | -3.55137500 | -0.74407800 | 2.42866400  |
| O | -0.93603600 | -0.50291300 | 0.20250800  |
| C | -0.06693500 | -1.12267100 | -0.64681800 |
| O | -0.41066200 | -1.90188900 | -1.48578400 |
| C | 1.33222800  | -0.68120100 | -0.38772400 |
| C | 2.33058700  | -1.19452700 | -1.22143600 |
| C | 1.65126300  | 0.21684700  | 0.63702400  |
| C | 3.65293600  | -0.80810700 | -1.03708700 |
| H | 2.06003100  | -1.89154500 | -2.01513400 |
| C | 2.97498500  | 0.60398200  | 0.82225900  |
| H | 0.87213100  | 0.61393900  | 1.28727700  |
| C | 3.96507900  | 0.09057600  | -0.01588800 |
| H | 4.43713900  | -1.19827200 | -1.68701700 |
| H | 3.23376000  | 1.30803600  | 1.61401300  |
| C | 5.40075500  | 0.48245600  | 0.21034200  |
| F | 6.11119500  | 0.44428400  | -0.91856000 |

|   |            |             |            |
|---|------------|-------------|------------|
| F | 6.00491800 | -0.33875900 | 1.07694700 |
| F | 5.50836400 | 1.71579400  | 0.70875000 |

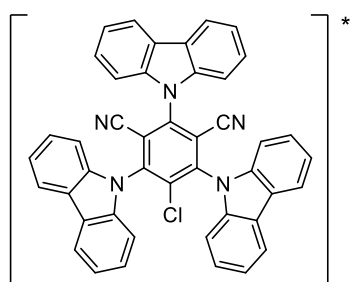

3CzClIPN\*

|                                              |             |             |                             |
|----------------------------------------------|-------------|-------------|-----------------------------|
| Zero-point correction=                       |             |             | 0.559127 (Hartree/Particle) |
| Thermal correction to Energy=                |             |             | 0.596781                    |
| Thermal correction to Enthalpy=              |             |             | 0.597725                    |
| Thermal correction to Gibbs Free Energy=     |             |             | 0.485566                    |
| Sum of electronic and zero-point Energies=   |             |             | -2422.157014                |
| Sum of electronic and thermal Energies=      |             |             | -2422.119360                |
| Sum of electronic and thermal Enthalpies=    |             |             | -2422.118416                |
| Sum of electronic and thermal Free Energies= |             |             | -2422.230575                |
| C                                            | -1.18676400 | 0.68144700  | -0.27789300                 |
| C                                            | -1.19616000 | -0.77057800 | -0.23326400                 |
| C                                            | -0.00020600 | -1.45228700 | 0.00046700                  |
| C                                            | 1.19610300  | -0.77051900 | 0.23371300                  |
| C                                            | 1.18690900  | 0.68151900  | 0.27764300                  |
| C                                            | 0.00007800  | 1.37375700  | -0.00026900                 |
| C                                            | 2.36575200  | 1.37393700  | 0.65498600                  |
| N                                            | 3.35099000  | 1.91471100  | 0.94640300                  |
| C                                            | -2.36548700 | 1.37388600  | -0.65558100                 |
| N                                            | -3.35055500 | 1.91475200  | -0.94734100                 |
| Cl                                           | -0.00026500 | -3.18334000 | 0.00116900                  |
| C                                            | -4.62238600 | -0.91161600 | 2.58063100                  |
| C                                            | -5.72717800 | -1.62883900 | 2.10122000                  |
| C                                            | -5.70050000 | -2.25262400 | 0.84785200                  |

|   |             |             |             |
|---|-------------|-------------|-------------|
| C | -4.54851100 | -2.14416300 | 0.07556200  |
| C | -3.44333100 | -1.41561600 | 0.57619000  |
| C | -3.45575500 | -0.79141900 | 1.82609500  |
| C | -4.15657100 | -2.63593400 | -1.24243800 |
| C | -2.83964000 | -2.16885600 | -1.47020300 |
| N | -2.41797300 | -1.44182100 | -0.36283800 |
| C | -4.79220900 | -3.39226300 | -2.22228700 |
| C | -4.10168800 | -3.66596300 | -3.40838900 |
| C | -2.79950600 | -3.18929000 | -3.61879600 |
| C | -2.14308200 | -2.42881500 | -2.65286400 |
| C | -2.28629200 | 4.25215800  | 2.54804100  |
| C | -2.02988800 | 5.60257800  | 2.25676900  |
| C | -1.13075100 | 5.95805400  | 1.25462400  |
| C | -0.49061300 | 4.94450900  | 0.53551300  |
| C | -0.76796700 | 3.59159500  | 0.83546500  |
| C | -1.66062400 | 3.22526300  | 1.84702500  |
| C | 0.49178000  | 4.94422100  | -0.53694200 |
| C | 0.76863300  | 3.59114900  | -0.83662200 |
| N | 0.00012600  | 2.77874000  | -0.00055900 |
| C | 1.13234600  | 5.95739600  | -1.25619700 |
| C | 2.03142200  | 5.60139800  | -2.25820700 |
| C | 2.28732700  | 4.25081900  | -2.54921000 |
| C | 1.66121400  | 3.22429500  | -1.84804100 |
| C | 4.62062900  | -0.91550600 | -2.58195600 |
| C | 5.72540500  | -1.63248700 | -2.10231800 |
| C | 5.69929500  | -2.25503000 | -0.84819200 |
| C | 4.54783000  | -2.14550900 | -0.07546500 |
| C | 3.44259800  | -1.41716200 | -0.57634600 |
| C | 3.45440600  | -0.79421800 | -1.82688800 |
| C | 4.15641500  | -2.63562400 | 1.24338900  |

|   |             |             |             |
|---|-------------|-------------|-------------|
| C | 2.83976600  | -2.16774500 | 1.47128100  |
| N | 2.41777900  | -1.44189200 | 0.36328900  |
| C | 4.79208900  | -3.39101600 | 2.22377100  |
| C | 4.10187200  | -3.66297000 | 3.41058300  |
| C | 2.80005500  | -3.18550300 | 3.62110500  |
| C | 2.14353600  | -2.42587400 | 2.65453200  |
| H | -4.67334800 | -0.43865300 | 3.56226700  |
| H | -6.62460900 | -1.70258300 | 2.71688100  |
| H | -6.56526700 | -2.81065800 | 0.48524700  |
| H | -2.58763800 | -0.24079000 | 2.19336200  |
| H | -5.80816900 | -3.76068400 | -2.07137600 |
| H | -4.58626100 | -4.25827700 | -4.18574900 |
| H | -2.28971500 | -3.41574000 | -4.55627100 |
| H | -1.13052600 | -2.05241900 | -2.80779600 |
| H | -2.99047700 | 3.99869300  | 3.34210900  |
| H | -2.53954300 | 6.38044200  | 2.82703500  |
| H | -0.92478800 | 7.00693300  | 1.03386900  |
| H | -1.85994100 | 2.17801400  | 2.07961700  |
| H | 0.92676100  | 7.00638900  | -1.03564800 |
| H | 2.54144200  | 6.37895100  | -2.82856800 |
| H | 2.99145400  | 3.99693900  | -3.34319700 |
| H | 1.86011700  | 2.17692500  | -2.08044000 |
| H | 4.67120700  | -0.44361000 | -3.56411600 |
| H | 6.62250900  | -1.70713400 | -2.71834800 |
| H | 6.56416900  | -2.81286700 | -0.48555500 |
| H | 2.58616800  | -0.24378000 | -2.19412900 |
| H | 5.80779800  | -3.76013900 | 2.07295200  |
| H | 4.58658000  | -4.25457600 | 4.18839400  |
| H | 2.29064700  | -3.41061000 | 4.55910600  |
| H | 1.13123900  | -2.04874000 | 2.80930000  |

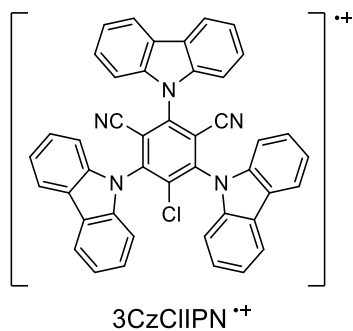

|                                              |             |             |                             |
|----------------------------------------------|-------------|-------------|-----------------------------|
| Zero-point correction=                       |             |             | 0.563026 (Hartree/Particle) |
| Thermal correction to Energy=                |             |             | 0.600066                    |
| Thermal correction to Enthalpy=              |             |             | 0.601010                    |
| Thermal correction to Gibbs Free Energy=     |             |             | 0.491316                    |
| Sum of electronic and zero-point Energies=   |             |             | -2422.034365                |
| Sum of electronic and thermal Energies=      |             |             | -2421.997326                |
| Sum of electronic and thermal Enthalpies=    |             |             | -2421.996381                |
| Sum of electronic and thermal Free Energies= |             |             | -2422.106076                |
| C                                            | -1.14458000 | 0.76279900  | -0.15295000                 |
| C                                            | -1.27198500 | -0.63707300 | -0.15435700                 |
| C                                            | -0.12109100 | -1.42790500 | 0.01622500                  |
| C                                            | 1.13202200  | -0.82492000 | 0.19470900                  |
| C                                            | 1.23871800  | 0.57666100  | 0.22154500                  |
| C                                            | 0.10314500  | 1.37636600  | 0.03424600                  |
| C                                            | 2.51095700  | 1.18653100  | 0.49090500                  |
| N                                            | 3.53381700  | 1.67615000  | 0.70162500                  |
| C                                            | -2.30300000 | 1.57003400  | -0.42775200                 |
| N                                            | -3.23192900 | 2.21763900  | -0.64594000                 |
| Cl                                           | -0.25325500 | -3.13725600 | -0.01448700                 |
| C                                            | -4.91194400 | -0.49367700 | 2.42373900                  |
| C                                            | -6.02026500 | -1.16708300 | 1.88282600                  |
| C                                            | -5.93187600 | -1.81481900 | 0.65454900                  |
| C                                            | -4.71725400 | -1.78014200 | -0.03914300                 |
| C                                            | -3.61726900 | -1.09602700 | 0.52107800                  |

|   |             |             |             |
|---|-------------|-------------|-------------|
| C | -3.69157700 | -0.44811600 | 1.75510000  |
| C | -4.27240900 | -2.33008500 | -1.31004500 |
| C | -2.92035900 | -1.95776400 | -1.46968300 |
| N | -2.52666600 | -1.21673300 | -0.34922300 |
| C | -4.90485800 | -3.07361400 | -2.31264600 |
| C | -4.17819600 | -3.42155900 | -3.44676600 |
| C | -2.83718300 | -3.02689100 | -3.59291900 |
| C | -2.18645600 | -2.28546400 | -2.61100200 |
| C | -1.63618900 | 4.43547000  | 2.76992500  |
| C | -1.29762100 | 5.75276300  | 2.42898000  |
| C | -0.47638300 | 6.03175000  | 1.32909500  |
| C | -0.00924800 | 4.96945300  | 0.56469900  |
| C | -0.37392600 | 3.64813600  | 0.91473300  |
| C | -1.17415100 | 3.35437600  | 2.02358600  |
| C | 0.85752400  | 4.87219100  | -0.60586200 |
| C | 0.97716800  | 3.49706900  | -0.91338300 |
| N | 0.22255800  | 2.77092200  | 0.00977900  |
| C | 1.50592600  | 5.80894300  | -1.40118200 |
| C | 2.26393800  | 5.35326500  | -2.48838900 |
| C | 2.36418200  | 3.98746600  | -2.78332500 |
| C | 1.71851200  | 3.03000100  | -2.00321000 |
| C | 4.72272600  | -1.18091800 | -2.41873600 |
| C | 5.71493700  | -2.02357400 | -1.90137300 |
| C | 5.54413700  | -2.68267200 | -0.67592800 |
| C | 4.36363300  | -2.47910200 | 0.02809500  |
| C | 3.37349500  | -1.62453900 | -0.51027400 |
| C | 3.52835500  | -0.96554800 | -1.73316400 |
| C | 3.84519300  | -2.97567100 | 1.29983300  |
| C | 2.56486800  | -2.39827100 | 1.47121300  |
| N | 2.28921700  | -1.59747200 | 0.36597700  |

|   |             |             |             |
|---|-------------|-------------|-------------|
| C | 4.35257400  | -3.81345200 | 2.28616300  |
| C | 3.57252400  | -4.05313600 | 3.42445300  |
| C | 2.31188700  | -3.45885300 | 3.58370700  |
| C | 1.78463800  | -2.61319800 | 2.61187500  |
| H | -5.00547200 | 0.00492900  | 3.38980500  |
| H | -6.96023500 | -1.18231200 | 2.43608300  |
| H | -6.79121300 | -2.34165700 | 0.23599000  |
| H | -2.83135700 | 0.07061200  | 2.18326400  |
| H | -5.95018800 | -3.36837700 | -2.20471200 |
| H | -4.65526600 | -4.00139300 | -4.23803600 |
| H | -2.29177900 | -3.30316300 | -4.49677700 |
| H | -1.14804700 | -1.97226900 | -2.73478300 |
| H | -2.26690800 | 4.24947200  | 3.63981100  |
| H | -1.67411900 | 6.57579200  | 3.03769400  |
| H | -0.20685500 | 7.05900800  | 1.07986100  |
| H | -1.42177900 | 2.32834700  | 2.30130900  |
| H | 1.42358000  | 6.87524900  | -1.18598900 |
| H | 2.78043300  | 6.07646200  | -3.12067900 |
| H | 2.95461900  | 3.66319800  | -3.64085400 |
| H | 1.78675900  | 1.96708900  | -2.24242300 |
| H | 4.88323900  | -0.68242600 | -3.37530000 |
| H | 6.63795800  | -2.17097200 | -2.46338800 |
| H | 6.32088200  | -3.34080400 | -0.28390400 |
| H | 2.75270000  | -0.31204800 | -2.13676400 |
| H | 5.33806100  | -4.26884800 | 2.17906600  |
| H | 3.95639700  | -4.70831400 | 4.20746100  |
| H | 1.73443300  | -3.65612600 | 4.48752700  |
| H | 0.81106200  | -2.13684600 | 2.74135600  |



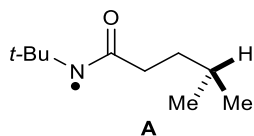

|                                              |             |             |                             |
|----------------------------------------------|-------------|-------------|-----------------------------|
| Zero-point correction=                       |             |             | 0.286159 (Hartree/Particle) |
| Thermal correction to Energy=                |             |             | 0.301185                    |
| Thermal correction to Enthalpy=              |             |             | 0.302129                    |
| Thermal correction to Gibbs Free Energy=     |             |             | 0.243433                    |
| Sum of electronic and zero-point Energies=   |             |             | -522.118354                 |
| Sum of electronic and thermal Energies=      |             |             | -522.103327                 |
| Sum of electronic and thermal Enthalpies=    |             |             | -522.102383                 |
| Sum of electronic and thermal Free Energies= |             |             | -522.161079                 |
| N                                            | -0.91759100 | 0.26073100  | -0.75339400                 |
| C                                            | -0.40681000 | 1.41678600  | -0.19393100                 |
| C                                            | 1.01346800  | 1.76436800  | -0.59077600                 |
| O                                            | -1.10158500 | 2.17162400  | 0.46290500                  |
| C                                            | 1.91686000  | 0.59536800  | -0.97437800                 |
| C                                            | 2.03109400  | -0.51807000 | 0.07362500                  |
| C                                            | 3.05669600  | -1.55488000 | -0.37494100                 |
| C                                            | 2.36387600  | 0.01822400  | 1.46334400                  |
| C                                            | -1.81724600 | -0.62169000 | -0.02220500                 |
| C                                            | -1.68593600 | -2.01197600 | -0.64885600                 |
| C                                            | -3.23652300 | -0.07593100 | -0.28318200                 |
| C                                            | -1.54317700 | -0.68781300 | 1.48301400                  |
| H                                            | 1.43067100  | 2.35636100  | 0.23610700                  |
| H                                            | 0.92132200  | 2.45566800  | -1.44561500                 |
| H                                            | 2.92395000  | 0.99776100  | -1.17637600                 |
| H                                            | 1.56120600  | 0.15468600  | -1.91934400                 |
| H                                            | 1.05153500  | -1.02489400 | 0.13214000                  |
| H                                            | 3.09806200  | -2.40521800 | 0.32212200                  |
| H                                            | 4.06385000  | -1.10918100 | -0.42272600                 |

|   |             |             |             |
|---|-------------|-------------|-------------|
| H | 2.81582900  | -1.94712600 | -1.37487700 |
| H | 2.48675500  | -0.80755300 | 2.18073500  |
| H | 1.57518300  | 0.67899400  | 1.85520600  |
| H | 3.30566000  | 0.59214800  | 1.44633000  |
| H | -2.41589600 | -2.69726600 | -0.19449400 |
| H | -0.67800400 | -2.42120600 | -0.48255200 |
| H | -1.86904300 | -1.96644600 | -1.73192900 |
| H | -3.96571800 | -0.75460400 | 0.18378100  |
| H | -3.44044900 | -0.02755000 | -1.36225100 |
| H | -3.34639000 | 0.92702300  | 0.14851800  |
| H | -2.25037500 | -1.38705300 | 1.95191900  |
| H | -1.66250000 | 0.29563900  | 1.95541600  |
| H | -0.52364200 | -1.05460500 | 1.67812800  |

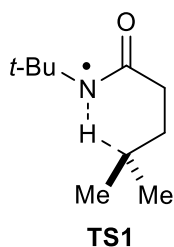

|                                              |             |            |                             |
|----------------------------------------------|-------------|------------|-----------------------------|
| Zero-point correction=                       |             |            | 0.281955 (Hartree/Particle) |
| Thermal correction to Energy=                |             |            | 0.296285                    |
| Thermal correction to Enthalpy=              |             |            | 0.297230                    |
| Thermal correction to Gibbs Free Energy=     |             |            | 0.241219                    |
| Sum of electronic and zero-point Energies=   |             |            | -522.109235                 |
| Sum of electronic and thermal Energies=      |             |            | -522.094904                 |
| Sum of electronic and thermal Enthalpies=    |             |            | -522.093960                 |
| Sum of electronic and thermal Free Energies= |             |            | -522.149971                 |
| N                                            | -0.54559700 | 0.18101200 | -0.49801300                 |
| C                                            | -0.32743200 | 1.48220900 | -0.14410400                 |
| C                                            | 1.12883500  | 1.93394500 | -0.12011900                 |
| O                                            | -1.23167200 | 2.26904100 | 0.09896600                  |

|   |             |             |             |
|---|-------------|-------------|-------------|
| C | 2.13479100  | 0.90485600  | -0.62592100 |
| C | 1.89404500  | -0.46601600 | -0.00460400 |
| C | 2.50733700  | -1.60933300 | -0.78478400 |
| C | 2.14858400  | -0.54141100 | 1.48772200  |
| C | -1.67417400 | -0.61967700 | -0.01912600 |
| C | -1.34710700 | -2.08081400 | -0.33458400 |
| C | -2.92014800 | -0.19140600 | -0.81078900 |
| C | -1.90009100 | -0.44498200 | 1.48448600  |
| H | 1.33234100  | 2.20864400  | 0.92756600  |
| H | 1.18109400  | 2.87164300  | -0.69192300 |
| H | 3.16306200  | 1.24547300  | -0.41606000 |
| H | 2.04238100  | 0.81321300  | -1.71973300 |
| H | 0.70999600  | -0.52190100 | -0.17900100 |
| H | 2.25738000  | -2.58345700 | -0.33910600 |
| H | 3.60767100  | -1.51590800 | -0.78833000 |
| H | 2.16862900  | -1.60632400 | -1.83158500 |
| H | 1.83367700  | -1.51350400 | 1.89563800  |
| H | 1.62239800  | 0.24948600  | 2.04198300  |
| H | 3.22836600  | -0.42998800 | 1.68952300  |
| H | -2.20013800 | -2.72472100 | -0.07673200 |
| H | -0.47375800 | -2.41763500 | 0.24579100  |
| H | -1.12264400 | -2.20408400 | -1.40463600 |
| H | -3.77108400 | -0.82819100 | -0.52536400 |
| H | -2.74402900 | -0.30480600 | -1.89057500 |
| H | -3.16385300 | 0.85711300  | -0.59927700 |
| H | -2.73283300 | -1.08013000 | 1.82087100  |
| H | -2.13742100 | 0.60010300  | 1.72462100  |
| H | -0.99651700 | -0.73866400 | 2.04162400  |

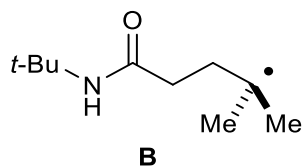

|                                              |             |             |                             |
|----------------------------------------------|-------------|-------------|-----------------------------|
| Zero-point correction=                       |             |             | 0.285846 (Hartree/Particle) |
| Thermal correction to Energy=                |             |             | 0.301292                    |
| Thermal correction to Enthalpy=              |             |             | 0.302236                    |
| Thermal correction to Gibbs Free Energy=     |             |             | 0.243120                    |
| Sum of electronic and zero-point Energies=   |             |             | -522.143085                 |
| Sum of electronic and thermal Energies=      |             |             | -522.127638                 |
| Sum of electronic and thermal Enthalpies=    |             |             | -522.126694                 |
| Sum of electronic and thermal Free Energies= |             |             | -522.185811                 |
| N                                            | -0.61425600 | 0.02957800  | -0.23180000                 |
| C                                            | -0.36340900 | 1.34567300  | -0.05114200                 |
| C                                            | 1.08564200  | 1.79063200  | -0.21727900                 |
| O                                            | -1.22416400 | 2.16580000  | 0.23969900                  |
| C                                            | 2.09345800  | 0.79997200  | -0.79650300                 |
| C                                            | 2.39531600  | -0.42067600 | 0.02896300                  |
| C                                            | 3.27838200  | -1.45142200 | -0.59372500                 |
| C                                            | 2.32907400  | -0.34502200 | 1.51991700                  |
| C                                            | -1.91775700 | -0.62583700 | -0.04668200                 |
| C                                            | -1.70042400 | -2.10695100 | -0.35191300                 |
| C                                            | -2.94649400 | -0.04169000 | -1.01831900                 |
| C                                            | -2.38965900 | -0.45828200 | 1.40069800                  |
| H                                            | 1.40857500  | 2.14123400  | 0.77615300                  |
| H                                            | 1.04246400  | 2.69070800  | -0.84734700                 |
| H                                            | 3.03981700  | 1.35493200  | -0.96292200                 |
| H                                            | 1.76989100  | 0.48676500  | -1.80515600                 |
| H                                            | 0.17886200  | -0.57799200 | -0.41840600                 |
| H                                            | 3.18089900  | -2.42773700 | -0.09438600                 |

|   |             |             |             |
|---|-------------|-------------|-------------|
| H | 4.34712100  | -1.16286400 | -0.52283100 |
| H | 3.05750300  | -1.58335100 | -1.66431900 |
| H | 2.46295900  | -1.33853300 | 1.97309500  |
| H | 1.36922600  | 0.06227300  | 1.87645000  |
| H | 3.12334500  | 0.30909600  | 1.93381800  |
| H | -2.63983100 | -2.66231200 | -0.22173500 |
| H | -0.94755700 | -2.53831100 | 0.32649000  |
| H | -1.35578600 | -2.24592600 | -1.38816700 |
| H | -3.90532100 | -0.57111100 | -0.91486000 |
| H | -2.59737700 | -0.15379200 | -2.05609400 |
| H | -3.10523200 | 1.02471900  | -0.81434000 |
| H | -3.35455300 | -0.96628500 | 1.54694800  |
| H | -2.50899000 | 0.60563800  | 1.64352200  |
| H | -1.65768800 | -0.89897200 | 2.09502000  |

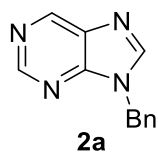

|                                              |            |             |                             |
|----------------------------------------------|------------|-------------|-----------------------------|
| Zero-point correction=                       |            |             | 0.207481 (Hartree/Particle) |
| Thermal correction to Energy=                |            |             | 0.218922                    |
| Thermal correction to Enthalpy=              |            |             | 0.219866                    |
| Thermal correction to Gibbs Free Energy=     |            |             | 0.167737                    |
| Sum of electronic and zero-point Energies=   |            |             | -681.353328                 |
| Sum of electronic and thermal Energies=      |            |             | -681.341887                 |
| Sum of electronic and thermal Enthalpies=    |            |             | -681.340943                 |
| Sum of electronic and thermal Free Energies= |            |             | -681.393072                 |
| N                                            | 3.45633500 | -1.46479900 | -0.54831900                 |
| C                                            | 2.47950500 | -1.93349400 | 0.24107900                  |
| N                                            | 1.44334400 | -1.25162100 | 0.71822000                  |
| C                                            | 1.43481500 | 0.01901600  | 0.33999500                  |
| C                                            | 2.40026000 | 0.63958200  | -0.48301300                 |

|   |             |             |             |
|---|-------------|-------------|-------------|
| C | 3.43621500  | -0.18655000 | -0.91907900 |
| N | 0.53235100  | 0.99802900  | 0.64653600  |
| C | 0.97600500  | 2.12953000  | 0.01241800  |
| N | 2.08043700  | 1.96560400  | -0.66645500 |
| C | -1.81700900 | 0.24798300  | 0.61973100  |
| C | -2.67354000 | 1.08751200  | -0.10052900 |
| C | -3.69952900 | 0.54965100  | -0.87722800 |
| C | -3.87704200 | -0.83342900 | -0.93925500 |
| C | -3.02643000 | -1.67608000 | -0.22237000 |
| C | -2.00001000 | -1.13760000 | 0.55398500  |
| C | -0.68527400 | 0.83316600  | 1.43391800  |
| H | 2.54319000  | -2.98896500 | 0.52014400  |
| H | 4.24127300  | 0.18181300  | -1.56245500 |
| H | 0.41735600  | 3.06165400  | 0.10643200  |
| H | -2.53837200 | 2.17070400  | -0.04620300 |
| H | -4.36568800 | 1.21259900  | -1.43226500 |
| H | -4.68176100 | -1.25483300 | -1.54444100 |
| H | -3.16446900 | -2.75796400 | -0.26524900 |
| H | -1.32929300 | -1.79399400 | 1.11283200  |
| H | -0.95655600 | 1.82266700  | 1.82168800  |
| H | -0.44073800 | 0.18010700  | 2.28174100  |

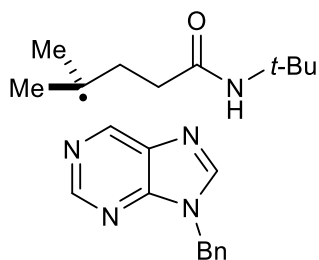

**Complex I**

|                                 |                             |
|---------------------------------|-----------------------------|
| Zero-point correction=          | 0.494756 (Hartree/Particle) |
| Thermal correction to Energy=   | 0.523403                    |
| Thermal correction to Enthalpy= | 0.524347                    |

|                                              |            |             |              |
|----------------------------------------------|------------|-------------|--------------|
| Thermal correction to Gibbs Free Energy=     |            |             | 0.431360     |
| Sum of electronic and zero-point Energies=   |            |             | -1203.507004 |
| Sum of electronic and thermal Energies=      |            |             | -1203.478357 |
| Sum of electronic and thermal Enthalpies=    |            |             | -1203.477413 |
| Sum of electronic and thermal Free Energies= |            |             | -1203.570400 |
| N                                            | 3.59814300 | -1.24044600 | 0.49698400   |
| C                                            | 4.24086300 | -0.14224000 | 0.03116700   |
| C                                            | 4.21993300 | 1.04516000  | 0.98105100   |
| O                                            | 4.77660600 | -0.08453000 | -1.06748600  |
| C                                            | 2.80358700 | 1.63788300  | 1.15526300   |
| C                                            | 2.20508000 | 2.14098600  | -0.12112200  |
| C                                            | 3.49612400 | -2.53723100 | -0.19063600  |
| C                                            | 2.71885100 | -3.46321200 | 0.74276300   |
| C                                            | 4.89401800 | -3.11151200 | -0.44074200  |
| C                                            | 2.73774100 | -2.38119600 | -1.51143400  |
| H                                            | 4.89790800 | 1.80105200  | 0.56297100   |
| H                                            | 4.61001900 | 0.73209600  | 1.96239800   |
| H                                            | 2.87616600 | 2.46218700  | 1.88388100   |
| H                                            | 2.14439300 | 0.87291800  | 1.60073800   |
| H                                            | 3.22136100 | -1.18875400 | 1.43829600   |
| H                                            | 2.60518000 | -4.45498400 | 0.28328100   |
| H                                            | 1.71517600 | -3.05905300 | 0.94522000   |
| H                                            | 3.24617500 | -3.58430800 | 1.70154600   |
| H                                            | 4.81715700 | -4.09766300 | -0.92229800  |
| H                                            | 5.43276700 | -3.23108600 | 0.51156600   |
| H                                            | 5.47374700 | -2.44399500 | -1.09143800  |
| H                                            | 2.65815100 | -3.35562200 | -2.01628200  |
| H                                            | 3.26225500 | -1.68140600 | -2.17538600  |
| H                                            | 1.71938200 | -2.00481400 | -1.32967200  |
| C                                            | 2.60485800 | 3.47978700  | -0.64679300  |

|   |             |             |             |
|---|-------------|-------------|-------------|
| H | 2.93439000  | 4.15385100  | 0.15858800  |
| H | 3.43707600  | 3.40819200  | -1.37578000 |
| H | 1.76975500  | 3.96451400  | -1.18134800 |
| C | 1.56940400  | 1.17890000  | -1.07076300 |
| H | 1.15535900  | 0.30386200  | -0.54548300 |
| H | 0.75951100  | 1.65893500  | -1.64781700 |
| H | 2.29889200  | 0.79599500  | -1.81184800 |
| N | -0.96907700 | 3.62480000  | 0.13979000  |
| C | -1.71876600 | 3.09377900  | -0.83766100 |
| N | -2.06801700 | 1.81856300  | -0.97421200 |
| C | -1.60767200 | 1.04480800  | 0.00060700  |
| C | -0.83229400 | 1.47617400  | 1.09682900  |
| C | -0.51242400 | 2.83435500  | 1.10948200  |
| N | -1.72563600 | -0.30939200 | 0.14715800  |
| C | -1.04875700 | -0.62410800 | 1.29659100  |
| N | -0.50020800 | 0.40338700  | 1.89205400  |
| C | -3.94172100 | -1.22298600 | -0.43771400 |
| C | -4.79710900 | -0.32300400 | -1.08294700 |
| C | -6.15919900 | -0.30733300 | -0.78204300 |
| C | -6.67652800 | -1.19156800 | 0.16563900  |
| C | -5.82857000 | -2.09343700 | 0.81050500  |
| C | -4.46677600 | -2.10868800 | 0.50934900  |
| C | -2.45881500 | -1.21419200 | -0.73241500 |
| H | -2.07232600 | 3.78361300  | -1.60911500 |
| H | 0.10676300  | 3.27810300  | 1.89565800  |
| H | -0.99786600 | -1.65990700 | 1.63425900  |
| H | -4.38711800 | 0.37196000  | -1.81927400 |
| H | -6.81955100 | 0.39715900  | -1.29097100 |
| H | -7.74260500 | -1.18038400 | 0.39956600  |
| H | -6.22999400 | -2.79049300 | 1.54830600  |



|   |             |             |             |
|---|-------------|-------------|-------------|
| H | -3.80329100 | -2.81857400 | 1.00967600  |
| H | -2.02831600 | -2.21429200 | -0.59775800 |
| H | -2.27076500 | -0.88799800 | -1.76386800 |

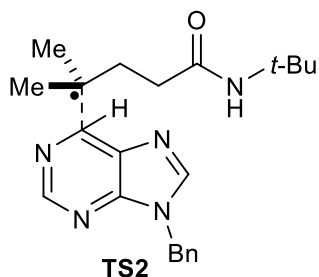

|                                              |            |             |                             |
|----------------------------------------------|------------|-------------|-----------------------------|
| Zero-point correction=                       |            |             | 0.495644 (Hartree/Particle) |
| Thermal correction to Energy=                |            |             | 0.522774                    |
| Thermal correction to Enthalpy=              |            |             | 0.523719                    |
| Thermal correction to Gibbs Free Energy=     |            |             | 0.435525                    |
| Sum of electronic and zero-point Energies=   |            |             | -1203.497102                |
| Sum of electronic and thermal Energies=      |            |             | -1203.469972                |
| Sum of electronic and thermal Enthalpies=    |            |             | -1203.469027                |
| Sum of electronic and thermal Free Energies= |            |             | -1203.557221                |
| N                                            | 3.63115200 | -1.13012600 | 0.48092600                  |
| C                                            | 4.27167200 | 0.03607300  | 0.23278800                  |
| C                                            | 3.98179000 | 1.14576800  | 1.23471200                  |
| O                                            | 5.02769000 | 0.20704900  | -0.71418700                 |
| C                                            | 2.49333100 | 1.51411700  | 1.38342300                  |
| C                                            | 1.88737700 | 2.09267700  | 0.13067100                  |
| C                                            | 3.75539800 | -2.36624800 | -0.30774600                 |
| C                                            | 2.83555300 | -3.39274200 | 0.35020700                  |
| C                                            | 5.20247900 | -2.86615900 | -0.27468800                 |
| C                                            | 3.30578000 | -2.12659200 | -1.75181100                 |
| H                                            | 4.56950900 | 2.01753200  | 0.91982600                  |
| H                                            | 4.35861300 | 0.82379800  | 2.21857800                  |
| H                                            | 2.41591000 | 2.25332000  | 2.19644300                  |
| H                                            | 1.91809300 | 0.62988400  | 1.70023400                  |

|   |             |             |             |
|---|-------------|-------------|-------------|
| H | 3.06330100  | -1.17817100 | 1.32102900  |
| H | 2.87917500  | -4.34446600 | -0.19750200 |
| H | 1.79293900  | -3.03874500 | 0.34679700  |
| H | 3.13770400  | -3.57908300 | 1.39231900  |
| H | 5.29022200  | -3.81049100 | -0.83236600 |
| H | 5.52114000  | -3.04438000 | 0.76354900  |
| H | 5.87469300  | -2.12532500 | -0.72725600 |
| H | 3.39316300  | -3.05993100 | -2.32777000 |
| H | 3.92950000  | -1.35909600 | -2.22805600 |
| H | 2.25498500  | -1.80139100 | -1.78112200 |
| C | 2.32550000  | 3.47809100  | -0.23396000 |
| H | 2.29256200  | 4.15719200  | 0.63193800  |
| H | 3.36916500  | 3.45167100  | -0.59836700 |
| H | 1.70374200  | 3.89594400  | -1.03730700 |
| C | 1.66381300  | 1.16026000  | -1.02131400 |
| H | 1.31644100  | 0.17207300  | -0.68652800 |
| H | 0.93720400  | 1.57942000  | -1.73639200 |
| H | 2.60828900  | 1.01433600  | -1.57678200 |
| N | -0.65398400 | 3.29496500  | -0.11721300 |
| C | -1.47955900 | 2.83440500  | -1.04750500 |
| N | -1.96738500 | 1.59273500  | -1.17193600 |
| C | -1.54699000 | 0.78479900  | -0.20027700 |
| C | -0.68481800 | 1.12912900  | 0.85515700  |
| C | -0.14340100 | 2.44263900  | 0.81646600  |
| N | -1.85291300 | -0.53732300 | -0.00590000 |
| C | -1.18625700 | -0.91909000 | 1.12427000  |
| N | -0.47401000 | 0.04230700  | 1.66449700  |
| C | -4.20474300 | -1.16475200 | -0.41211900 |
| C | -4.96531500 | -0.11703400 | -0.94408800 |
| C | -6.28825600 | 0.06691600  | -0.54247200 |

|   |             |             |             |
|---|-------------|-------------|-------------|
| C | -6.86224100 | -0.79548100 | 0.39324300  |
| C | -6.10954300 | -1.84298000 | 0.92570000  |
| C | -4.78603800 | -2.02605000 | 0.52419800  |
| C | -2.75868500 | -1.34221400 | -0.81708300 |
| H | -1.81833200 | 3.55705900  | -1.79731000 |
| H | 0.31560000  | 2.89319500  | 1.70160500  |
| H | -1.26874300 | -1.94071900 | 1.49582000  |
| H | -4.50876500 | 0.55963800  | -1.67002300 |
| H | -6.87448800 | 0.88567700  | -0.96365800 |
| H | -7.89838300 | -0.65260000 | 0.70534700  |
| H | -6.55554300 | -2.52261600 | 1.65409300  |
| H | -4.19768400 | -2.84916600 | 0.93734600  |
| H | -2.45136800 | -2.38960400 | -0.70731900 |
| H | -2.61127800 | -1.04246000 | -1.86293100 |

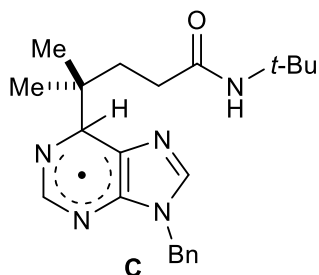

|                                              |            |             |                             |
|----------------------------------------------|------------|-------------|-----------------------------|
| Zero-point correction=                       |            |             | 0.498530 (Hartree/Particle) |
| Thermal correction to Energy=                |            |             | 0.525106                    |
| Thermal correction to Enthalpy=              |            |             | 0.526050                    |
| Thermal correction to Gibbs Free Energy=     |            |             | 0.440928                    |
| Sum of electronic and zero-point Energies=   |            |             | -1203.519734                |
| Sum of electronic and thermal Energies=      |            |             | -1203.493157                |
| Sum of electronic and thermal Enthalpies=    |            |             | -1203.492213                |
| Sum of electronic and thermal Free Energies= |            |             | -1203.577335                |
| N                                            | 3.32637900 | -1.13615200 | 0.51072200                  |
| C                                            | 4.16628000 | -0.08156800 | 0.37393500                  |
| C                                            | 3.89252100 | 1.11297800  | 1.28111700                  |

|   |             |             |             |
|---|-------------|-------------|-------------|
| O | 5.13343400  | -0.08320600 | -0.37585800 |
| C | 2.43709300  | 1.52426700  | 1.48892100  |
| C | 1.77051500  | 2.25238900  | 0.29951700  |
| C | 3.42518000  | -2.39818500 | -0.24006800 |
| C | 2.35439400  | -3.32636000 | 0.33032400  |
| C | 4.80150200  | -3.03808700 | -0.03670500 |
| C | 3.16141400  | -2.14691300 | -1.72787200 |
| H | 4.49360300  | 1.94045200  | 0.87986300  |
| H | 4.32943600  | 0.85255200  | 2.25929400  |
| H | 2.38854100  | 2.20284600  | 2.35562500  |
| H | 1.83823500  | 0.64949900  | 1.77749500  |
| H | 2.47062000  | -0.99730100 | 1.04144500  |
| H | 2.34849600  | -4.27939500 | -0.21714000 |
| H | 1.35715200  | -2.87118300 | 0.24037100  |
| H | 2.54606900  | -3.53499300 | 1.39392600  |
| H | 4.82811100  | -4.02151100 | -0.52911100 |
| H | 4.99749400  | -3.18384600 | 1.03662300  |
| H | 5.59400300  | -2.40721900 | -0.45576900 |
| H | 3.27122100  | -3.08077000 | -2.29949200 |
| H | 3.87323500  | -1.40841100 | -2.12188100 |
| H | 2.13778600  | -1.76984200 | -1.87930400 |
| C | 2.22530700  | 3.71352600  | 0.29413900  |
| H | 1.85008600  | 4.24576300  | 1.18211800  |
| H | 3.32487700  | 3.76243300  | 0.30444700  |
| H | 1.86569400  | 4.24320600  | -0.59750300 |
| C | 2.10018300  | 1.61486200  | -1.05285900 |
| H | 1.87072600  | 0.53971900  | -1.06855000 |
| H | 1.52087300  | 2.10447900  | -1.85193200 |
| H | 3.16731700  | 1.73600600  | -1.29256600 |
| N | -0.47265400 | 3.19745700  | -0.23958200 |

|   |             |             |             |
|---|-------------|-------------|-------------|
| C | -1.49576500 | 2.92404300  | -0.96881000 |
| N | -2.11080800 | 1.70178000  | -1.17140100 |
| C | -1.50610000 | 0.73342800  | -0.51454100 |
| C | -0.37093900 | 0.83564300  | 0.32763700  |
| C | 0.22321400  | 2.18870600  | 0.53974700  |
| N | -1.82837400 | -0.60641900 | -0.52763700 |
| C | -0.92007900 | -1.22328800 | 0.26024500  |
| N | -0.02763000 | -0.38731100 | 0.78529100  |
| C | -4.25187000 | -1.03505300 | -0.44365900 |
| C | -5.10459300 | 0.04351500  | -0.69991000 |
| C | -6.27298900 | 0.20928800  | 0.04479400  |
| C | -6.59600400 | -0.70107800 | 1.05160800  |
| C | -5.74898900 | -1.78021300 | 1.31114000  |
| C | -4.58259500 | -1.94649700 | 0.56532800  |
| C | -2.96625100 | -1.19967900 | -1.22205200 |
| H | -1.96022800 | 3.75284200  | -1.51583200 |
| H | 0.09460100  | 2.47672900  | 1.60499700  |
| H | -0.94565600 | -2.30151400 | 0.41723800  |
| H | -4.84357200 | 0.75822500  | -1.48334400 |
| H | -6.93400200 | 1.05262100  | -0.16309700 |
| H | -7.51062700 | -0.57191600 | 1.63313800  |
| H | -6.00038900 | -2.49745400 | 2.09451100  |
| H | -3.92270700 | -2.79509700 | 0.76335200  |
| H | -2.73479400 | -2.26101200 | -1.37417900 |
| H | -3.04063800 | -0.71008500 | -2.20149300 |

**K<sub>2</sub>CO<sub>3</sub>**

|                                          |                             |
|------------------------------------------|-----------------------------|
| Zero-point correction=                   | 0.017210 (Hartree/Particle) |
| Thermal correction to Energy=            | 0.024014                    |
| Thermal correction to Enthalpy=          | 0.024958                    |
| Thermal correction to Gibbs Free Energy= | -0.016365                   |

|                                              |             |             |              |
|----------------------------------------------|-------------|-------------|--------------|
| Sum of electronic and zero-point Energies=   |             |             | -1463.324170 |
| Sum of electronic and thermal Energies=      |             |             | -1463.317366 |
| Sum of electronic and thermal Enthalpies=    |             |             | -1463.316422 |
| Sum of electronic and thermal Free Energies= |             |             | -1463.357746 |
| C                                            | -0.00020300 | 0.82703200  | 0.00223000   |
| O                                            | 1.11756000  | 1.44339300  | 0.00317100   |
| O                                            | -1.11806800 | 1.44339500  | -0.00486100  |
| O                                            | 0.00000600  | -0.49180500 | 0.00746200   |
| K                                            | 2.48779900  | -0.63468300 | -0.00232700  |
| K                                            | -2.48752400 | -0.63489900 | -0.00080800  |

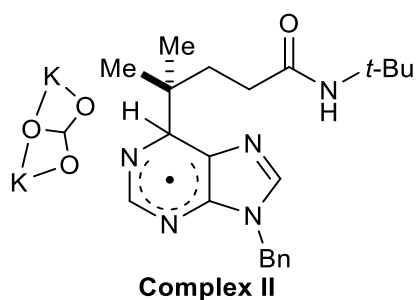

|                                              |            |             |                             |
|----------------------------------------------|------------|-------------|-----------------------------|
| Zero-point correction=                       |            |             | 0.517247 (Hartree/Particle) |
| Thermal correction to Energy=                |            |             | 0.551905                    |
| Thermal correction to Enthalpy=              |            |             | 0.552850                    |
| Thermal correction to Gibbs Free Energy=     |            |             | 0.449026                    |
| Sum of electronic and zero-point Energies=   |            |             | -2666.883420                |
| Sum of electronic and thermal Energies=      |            |             | -2666.848762                |
| Sum of electronic and thermal Enthalpies=    |            |             | -2666.847817                |
| Sum of electronic and thermal Free Energies= |            |             | -2666.951641                |
| N                                            | 3.90461800 | -0.90000800 | 0.15374900                  |
| C                                            | 4.75579600 | 0.15259500  | 0.17061400                  |
| C                                            | 4.21324500 | 1.48470500  | 0.67629700                  |
| O                                            | 5.93963300 | 0.06284500  | -0.12997300                 |
| C                                            | 2.70914000 | 1.72870400  | 0.67313600                  |
| C                                            | 2.08313200 | 2.13807800  | -0.68140200                 |

|   |             |             |             |
|---|-------------|-------------|-------------|
| C | 4.28582900  | -2.27078800 | -0.22589200 |
| C | 3.01570000  | -3.11626500 | -0.15049100 |
| C | 5.32696600  | -2.81191000 | 0.75806300  |
| C | 4.83266900  | -2.30481400 | -1.65678100 |
| H | 4.75459000  | 2.26168600  | 0.11685500  |
| H | 4.58511200  | 1.55343400  | 1.71195100  |
| H | 2.48378900  | 2.53747800  | 1.38454800  |
| H | 2.18806800  | 0.85396600  | 1.08394300  |
| H | 2.91361300  | -0.73569200 | 0.31998200  |
| H | 3.25130700  | -4.16823800 | -0.36514600 |
| H | 2.27627800  | -2.77149700 | -0.88839000 |
| H | 2.56324000  | -3.06008600 | 0.85278500  |
| H | 5.59418500  | -3.84656200 | 0.49614400  |
| H | 4.92343700  | -2.80679600 | 1.78221100  |
| H | 6.23495400  | -2.19546000 | 0.73386300  |
| H | 5.06357400  | -3.34114300 | -1.94573400 |
| H | 5.74524900  | -1.70100700 | -1.73542600 |
| H | 4.08542400  | -1.90945500 | -2.36224300 |
| C | 2.36331500  | 3.62512400  | -0.91110300 |
| H | 1.85253700  | 4.24091100  | -0.15438400 |
| H | 3.44452600  | 3.82026300  | -0.83884800 |
| H | 2.02125800  | 3.95193400  | -1.90156100 |
| C | 2.61971700  | 1.34237800  | -1.87558000 |
| H | 2.48026900  | 0.25925700  | -1.75350500 |
| H | 2.09210100  | 1.65361900  | -2.79163500 |
| H | 3.69368200  | 1.53320900  | -2.03015400 |
| N | -0.20618500 | 2.67061600  | -1.53063600 |
| C | -1.27468800 | 2.21094500  | -2.07378800 |
| N | -1.83860400 | 0.94984400  | -1.93677600 |
| C | -1.06967700 | 0.14932300  | -1.22296700 |

|   |             |             |             |
|---|-------------|-------------|-------------|
| C | 0.11520800  | 0.49042800  | -0.52772800 |
| C | 0.54666000  | 1.91602400  | -0.55106400 |
| N | -1.24113600 | -1.20391300 | -1.01796100 |
| C | -0.20535800 | -1.60367900 | -0.25009700 |
| N | 0.62601800  | -0.61395500 | 0.06671200  |
| C | -3.63341400 | -1.80674200 | -0.95275000 |
| C | -4.69781400 | -1.29349800 | -1.70121900 |
| C | -5.93603900 | -1.05541000 | -1.09767600 |
| C | -6.11487400 | -1.32935400 | 0.26010800  |
| C | -5.05479700 | -1.84743100 | 1.01136600  |
| C | -3.82002900 | -2.08425900 | 0.40722200  |
| C | -2.28528500 | -2.03935700 | -1.59531200 |
| H | -1.83100800 | 2.87245500  | -2.74851600 |
| H | 0.26577700  | 2.34606400  | 0.44261500  |
| H | -0.08553700 | -2.64676100 | 0.04621800  |
| H | -4.55127300 | -1.06868100 | -2.76008400 |
| H | -6.75929000 | -0.65038700 | -1.68847700 |
| H | -7.07940000 | -1.14022200 | 0.73436000  |
| H | -5.19103100 | -2.06250500 | 2.07254800  |
| H | -2.98794500 | -2.47374500 | 0.99829000  |
| H | -1.96695200 | -3.08132100 | -1.46076000 |
| H | -2.33626100 | -1.82881400 | -2.67152700 |
| C | -1.43998400 | 1.60703100  | 1.85379900  |
| O | -0.32639000 | 1.82313700  | 2.45441700  |
| O | -2.05111400 | 2.54046300  | 1.23441600  |
| O | -1.93304800 | 0.39389200  | 1.84671600  |
| K | 0.16987700  | -0.58376600 | 2.88664600  |
| K | -3.82684600 | 1.05915200  | 0.26647500  |



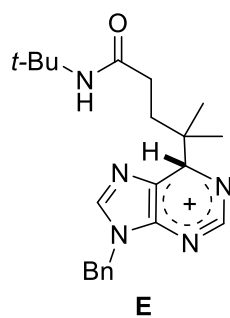

|                                              |             |             |                             |
|----------------------------------------------|-------------|-------------|-----------------------------|
| Zero-point correction=                       |             |             | 0.499286 (Hartree/Particle) |
| Thermal correction to Energy=                |             |             | 0.525927                    |
| Thermal correction to Enthalpy=              |             |             | 0.526871                    |
| Thermal correction to Gibbs Free Energy=     |             |             | 0.441884                    |
| Sum of electronic and zero-point Energies=   |             |             | -1203.328003                |
| Sum of electronic and thermal Energies=      |             |             | -1203.301362                |
| Sum of electronic and thermal Enthalpies=    |             |             | -1203.300418                |
| Sum of electronic and thermal Free Energies= |             |             | -1203.385405                |
| N                                            | -3.50613000 | -1.12505700 | -0.56317400                 |
| C                                            | -4.19512500 | 0.01401600  | -0.31816000                 |
| C                                            | -3.89483800 | 1.16967700  | -1.26761600                 |
| O                                            | -5.01824000 | 0.12565400  | 0.58001900                  |
| C                                            | -2.41623200 | 1.50426600  | -1.47810700                 |
| C                                            | -1.73684100 | 2.23820700  | -0.30328300                 |
| C                                            | -3.61963500 | -2.37734800 | 0.20096200                  |
| C                                            | -2.68066200 | -3.37914100 | -0.46773300                 |
| C                                            | -5.05625300 | -2.90510100 | 0.15083800                  |
| C                                            | -3.18133100 | -2.14514800 | 1.64970600                  |
| H                                            | -4.45701800 | 2.03391900  | -0.88995500                 |
| H                                            | -4.32976700 | 0.90232100  | -2.24398300                 |
| H                                            | -2.32211000 | 2.14886000  | -2.36609900                 |
| H                                            | -1.86230000 | 0.58650900  | -1.71716600                 |
| H                                            | -2.87525200 | -1.13200800 | -1.35776100                 |
| H                                            | -2.69171100 | -4.33137400 | 0.08067500                  |

|   |             |             |             |
|---|-------------|-------------|-------------|
| H | -1.64812000 | -2.99702100 | -0.47842900 |
| H | -2.99031200 | -3.57315000 | -1.50612300 |
| H | -5.12179200 | -3.86870400 | 0.67763400  |
| H | -5.36915700 | -3.05802500 | -0.89322000 |
| H | -5.74527900 | -2.19415900 | 0.62382000  |
| H | -3.28498000 | -3.07430100 | 2.22957700  |
| H | -3.79854000 | -1.36666400 | 2.11752800  |
| H | -2.12624300 | -1.83289400 | 1.68657700  |
| C | -2.14515100 | 3.71048900  | -0.30964600 |
| H | -1.76302900 | 4.22488000  | -1.20396200 |
| H | -3.24290000 | 3.77742000  | -0.31620800 |
| H | -1.77480500 | 4.23637500  | 0.57935400  |
| C | -2.05195800 | 1.61259600  | 1.05732900  |
| H | -1.86826100 | 0.52763800  | 1.06206000  |
| H | -1.44249300 | 2.07950500  | 1.84657700  |
| H | -3.10927700 | 1.77381600  | 1.30997300  |
| N | 0.53268900  | 3.16305400  | 0.18271200  |
| C | 1.54133000  | 2.92354700  | 0.92047200  |
| N | 2.13405000  | 1.65583800  | 1.14211500  |
| C | 1.57236700  | 0.70928900  | 0.51689200  |
| C | 0.39783900  | 0.80371600  | -0.36533300 |
| C | -0.17055000 | 2.15013200  | -0.55261900 |
| N | 1.88901900  | -0.65314600 | 0.52988000  |
| C | 0.99650200  | -1.23604800 | -0.24356100 |
| N | 0.07688900  | -0.38419300 | -0.80185000 |
| C | 4.31135400  | -1.07206500 | 0.46076000  |
| C | 5.16437500  | 0.00016600  | 0.73826200  |
| C | 6.33313400  | 0.17417000  | -0.00367700 |
| C | 6.65221300  | -0.72061200 | -1.02534700 |
| C | 5.80320900  | -1.79352800 | -1.30389200 |

|   |             |             |             |
|---|-------------|-------------|-------------|
| C | 4.63634700  | -1.96949500 | -0.56218700 |
| C | 3.03014400  | -1.25268500 | 1.23905300  |
| H | 2.03273500  | 3.73977500  | 1.45475900  |
| H | -0.05760000 | 2.41529100  | -1.62693000 |
| H | 0.99750400  | -2.31495700 | -0.41251900 |
| H | 4.91047100  | 0.69894100  | 1.53840000  |
| H | 6.99732900  | 1.01096300  | 0.21886000  |
| H | 7.56736800  | -0.58453400 | -1.60430800 |
| H | 6.05347800  | -2.49832600 | -2.09854900 |
| H | 3.97397300  | -2.81288500 | -0.77298400 |
| H | 2.78710700  | -2.31225300 | 1.37802600  |
| H | 3.07986200  | -0.76027000 | 2.21777200  |

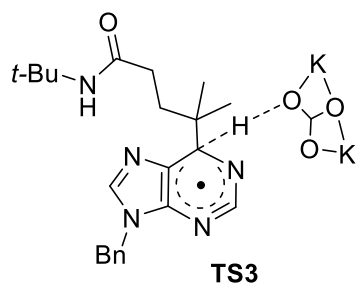

|                                              |            |             |                             |
|----------------------------------------------|------------|-------------|-----------------------------|
| Zero-point correction=                       |            |             | 0.513951 (Hartree/Particle) |
| Thermal correction to Energy=                |            |             | 0.548015                    |
| Thermal correction to Enthalpy=              |            |             | 0.548959                    |
| Thermal correction to Gibbs Free Energy=     |            |             | 0.446701                    |
| Sum of electronic and zero-point Energies=   |            |             | -2666.881795                |
| Sum of electronic and thermal Energies=      |            |             | -2666.847732                |
| Sum of electronic and thermal Enthalpies=    |            |             | -2666.846788                |
| Sum of electronic and thermal Free Energies= |            |             | -2666.949046                |
| N                                            | 3.73162500 | -0.80574200 | 0.02305100                  |
| C                                            | 4.52148900 | 0.23891800  | 0.38203500                  |
| C                                            | 3.84540700 | 1.45562800  | 1.00569900                  |
| O                                            | 5.74204300 | 0.21315900  | 0.29684900                  |

|   |             |             |             |
|---|-------------|-------------|-------------|
| C | 2.34025000  | 1.63024300  | 0.85498700  |
| C | 1.83864400  | 2.27127400  | -0.45980100 |
| C | 4.24139100  | -2.05313800 | -0.57510900 |
| C | 3.02550600  | -2.92249300 | -0.89073300 |
| C | 5.14442300  | -2.77991200 | 0.42506300  |
| C | 5.00071600  | -1.76112400 | -1.87446100 |
| H | 4.40139000  | 2.33204400  | 0.64054100  |
| H | 4.09382700  | 1.37674200  | 2.07699800  |
| H | 1.95824200  | 2.24096500  | 1.68460600  |
| H | 1.84202500  | 0.66703000  | 1.01185600  |
| H | 2.72467600  | -0.66115900 | -0.04472600 |
| H | 3.35364300  | -3.88204000 | -1.31487600 |
| H | 2.36827900  | -2.42712100 | -1.62052700 |
| H | 2.44125000  | -3.13630800 | 0.01917900  |
| H | 5.50669500  | -3.72294000 | -0.01070100 |
| H | 4.58485600  | -3.01683700 | 1.34315100  |
| H | 6.00821600  | -2.15675900 | 0.68882200  |
| H | 5.33444000  | -2.70293300 | -2.33519800 |
| H | 5.87721000  | -1.13165900 | -1.67707900 |
| H | 4.34610000  | -1.24165000 | -2.59133900 |
| C | 2.01200900  | 3.78806500  | -0.35605700 |
| H | 1.37888100  | 4.19927100  | 0.44576100  |
| H | 3.06015700  | 4.03369600  | -0.12472400 |
| H | 1.73976900  | 4.28942300  | -1.29408400 |
| C | 2.58129100  | 1.77155700  | -1.70624000 |
| H | 2.48808700  | 0.68388000  | -1.83670000 |
| H | 2.15957900  | 2.25457300  | -2.60209800 |
| H | 3.65340900  | 2.02260700  | -1.66477100 |
| N | -0.40016800 | 2.79861700  | -1.44946000 |
| C | -1.51399700 | 2.41943500  | -1.99302800 |

|   |             |             |             |
|---|-------------|-------------|-------------|
| N | -2.07929900 | 1.16883600  | -1.97772600 |
| C | -1.25332000 | 0.26618800  | -1.44861500 |
| C | -0.02111000 | 0.50919700  | -0.81643900 |
| C | 0.33995200  | 1.92096600  | -0.59779800 |
| N | -1.42422700 | -1.09920900 | -1.42293300 |
| C | -0.32440600 | -1.60983100 | -0.81829800 |
| N | 0.53529300  | -0.67698200 | -0.43402600 |
| C | -3.79543300 | -1.59106400 | -1.04719900 |
| C | -4.88787200 | -0.85591800 | -1.51986100 |
| C | -5.97701100 | -0.59307700 | -0.68417000 |
| C | -5.97918000 | -1.06495100 | 0.63066100  |
| C | -4.89262600 | -1.80626000 | 1.10563100  |
| C | -3.80607800 | -2.06685600 | 0.27006200  |
| C | -2.58406800 | -1.82445800 | -1.92295200 |
| H | -2.08724800 | 3.17083400  | -2.54870100 |
| H | -0.19655000 | 2.14036900  | 0.46230200  |
| H | -0.19303800 | -2.68603800 | -0.69478400 |
| H | -4.87764000 | -0.47541800 | -2.54349700 |
| H | -6.82227100 | -0.01405100 | -1.05991600 |
| H | -6.82679200 | -0.85587700 | 1.28554500  |
| H | -4.88990100 | -2.17660100 | 2.13210200  |
| H | -2.94990000 | -2.63132200 | 0.64762100  |
| H | -2.31320400 | -2.88781700 | -1.94283600 |
| H | -2.78415900 | -1.49456100 | -2.95059900 |
| C | -0.92695700 | 1.01448300  | 2.22401400  |
| O | 0.07072900  | 0.99018500  | 3.00074100  |
| O | -1.26907500 | 2.11688800  | 1.60682300  |
| O | -1.60739800 | -0.05853200 | 1.97717400  |
| K | 0.55341100  | -1.40711500 | 2.36173900  |
| K | -3.44746900 | 1.08902000  | 0.64190800  |

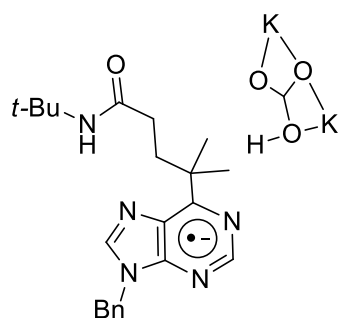

### Complex III

|                                              |            |             |                             |
|----------------------------------------------|------------|-------------|-----------------------------|
| Zero-point correction=                       |            |             | 0.516056 (Hartree/Particle) |
| Thermal correction to Energy=                |            |             | 0.551143                    |
| Thermal correction to Enthalpy=              |            |             | 0.552087                    |
| Thermal correction to Gibbs Free Energy=     |            |             | 0.448129                    |
| Sum of electronic and zero-point Energies=   |            |             | -2666.913150                |
| Sum of electronic and thermal Energies=      |            |             | -2666.878063                |
| Sum of electronic and thermal Enthalpies=    |            |             | -2666.877119                |
| Sum of electronic and thermal Free Energies= |            |             | -2666.981076                |
| N                                            | 3.75502700 | -0.87602700 | 0.12465100                  |
| C                                            | 4.58543800 | 0.14577200  | 0.46729600                  |
| C                                            | 3.95498000 | 1.43544200  | 0.98341300                  |
| O                                            | 5.80497700 | 0.04569300  | 0.45868400                  |
| C                                            | 2.46693500 | 1.67871500  | 0.76801200                  |
| C                                            | 2.02603600 | 2.27404400  | -0.59522200                 |
| C                                            | 4.23762000 | -2.18045200 | -0.36852400                 |
| C                                            | 3.00436800 | -3.03423800 | -0.66019400                 |
| C                                            | 5.08366100 | -2.87019000 | 0.70497800                  |
| C                                            | 5.04331900 | -2.00481200 | -1.66050600                 |
| H                                            | 4.57084900 | 2.25611200  | 0.58568800                  |
| H                                            | 4.16425000 | 1.41135400  | 2.06592600                  |
| H                                            | 2.09263700 | 2.35138100  | 1.55183600                  |
| H                                            | 1.91720000 | 0.74730900  | 0.94548200                  |
| H                                            | 2.77397800 | -0.66867000 | -0.07730300                 |

|   |             |             |             |
|---|-------------|-------------|-------------|
| H | 3.31552100  | -4.02429100 | -1.02265600 |
| H | 2.37281600  | -2.56469200 | -1.42734400 |
| H | 2.39935500  | -3.18559700 | 0.24922200  |
| H | 5.39754700  | -3.86396700 | 0.35234900  |
| H | 4.49583200  | -3.00088500 | 1.62687200  |
| H | 5.97654700  | -2.27783200 | 0.93803800  |
| H | 5.36773300  | -2.98508400 | -2.04081100 |
| H | 5.92986400  | -1.38417900 | -1.47994500 |
| H | 4.42487200  | -1.52374500 | -2.43414300 |
| C | 2.25532200  | 3.78561500  | -0.56482500 |
| H | 1.64841100  | 4.25990000  | 0.22116900  |
| H | 3.31566400  | 4.00658900  | -0.36418700 |
| H | 1.98106700  | 4.25028300  | -1.52254700 |
| C | 2.83740100  | 1.68746000  | -1.77052600 |
| H | 2.66310400  | 0.60827100  | -1.88899000 |
| H | 2.53398800  | 2.17970000  | -2.70782900 |
| H | 3.92078700  | 1.85110000  | -1.64457200 |
| N | -0.33847900 | 2.90954400  | -1.17755100 |
| C | -1.55912800 | 2.60520700  | -1.54853200 |
| N | -2.12323200 | 1.35353900  | -1.66813900 |
| C | -1.22094200 | 0.39851500  | -1.36212300 |
| C | 0.08852600  | 0.58998900  | -0.89170500 |
| C | 0.55862800  | 1.94848500  | -0.80813100 |
| N | -1.39448300 | -0.95793200 | -1.43508700 |
| C | -0.23182900 | -1.54380700 | -0.99537300 |
| N | 0.67471200  | -0.62744200 | -0.65797600 |
| C | -3.74807000 | -1.60135300 | -1.04302700 |
| C | -4.96868000 | -1.06901400 | -1.47313500 |
| C | -6.05843700 | -0.99886900 | -0.60025500 |
| C | -5.93288600 | -1.46049900 | 0.71225900  |

|   |             |             |             |
|---|-------------|-------------|-------------|
| C | -4.71779200 | -2.00140400 | 1.14493500  |
| C | -3.63248800 | -2.07204800 | 0.27097900  |
| C | -2.55605400 | -1.64202300 | -1.97303800 |
| H | -2.23169500 | 3.43818300  | -1.78685400 |
| H | -0.99973900 | 2.92955300  | 1.46564500  |
| H | -0.10168100 | -2.62499700 | -0.97472400 |
| H | -5.06030700 | -0.69251900 | -2.49456300 |
| H | -7.00327000 | -0.57476600 | -0.94432400 |
| H | -6.77952500 | -1.39940200 | 1.39805100  |
| H | -4.61462600 | -2.36251600 | 2.16961600  |
| H | -2.67777200 | -2.47685600 | 0.61614300  |
| H | -2.25842600 | -2.68244100 | -2.16415800 |
| H | -2.82115200 | -1.18190200 | -2.93489600 |
| C | -1.10331200 | 1.12533000  | 2.09789100  |
| O | 0.00643200  | 1.24659700  | 2.63073500  |
| O | -1.69163900 | 2.25958000  | 1.57713600  |
| O | -1.78911200 | 0.08604000  | 1.96437300  |
| K | 0.52223100  | -1.24540700 | 2.07732700  |
| K | -3.77747300 | 1.05037400  | 0.52094800  |

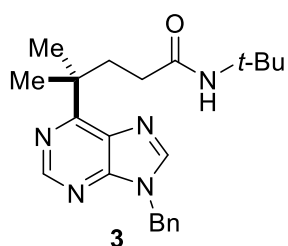

|                                            |                             |
|--------------------------------------------|-----------------------------|
| Zero-point correction=                     | 0.488726 (Hartree/Particle) |
| Thermal correction to Energy=              | 0.515021                    |
| Thermal correction to Enthalpy=            | 0.515965                    |
| Thermal correction to Gibbs Free Energy=   | 0.431066                    |
| Sum of electronic and zero-point Energies= | -1202.990003                |
| Sum of electronic and thermal Energies=    | -1202.963708                |



|                                              |            |             |              |
|----------------------------------------------|------------|-------------|--------------|
| Sum of electronic and thermal Enthalpies=    |            |             | -1202.962764 |
| Sum of electronic and thermal Free Energies= |            |             | -1203.047663 |
| N                                            | 3.21706300 | -0.99358200 | 0.44565700   |
| C                                            | 3.98838100 | -0.04871700 | 1.03245600   |
| C                                            | 3.27720400 | 1.05001900  | 1.81697700   |
| O                                            | 5.21278100 | -0.07484000 | 1.01734000   |
| C                                            | 1.82557000 | 1.37385800  | 1.48513700   |
| C                                            | 1.59713500 | 2.23690900  | 0.21223400   |
| C                                            | 3.74562700 | -2.13174800 | -0.32637100  |
| C                                            | 2.53698800 | -2.92371900 | -0.82384100  |
| C                                            | 4.60501200 | -3.02303800 | 0.57472400   |
| C                                            | 4.55993300 | -1.63390500 | -1.52533200  |
| H                                            | 3.92152800 | 1.93770400  | 1.74145100   |
| H                                            | 3.33624200 | 0.72591600  | 2.86907700   |
| H                                            | 1.39193100 | 1.92911500  | 2.33117900   |
| H                                            | 1.24783300 | 0.44105700  | 1.43227700   |
| H                                            | 2.21156100 | -0.84083400 | 0.38036700   |
| H                                            | 2.87333700 | -3.80722900 | -1.38459300  |
| H                                            | 1.91193000 | -2.30740100 | -1.48685400  |
| H                                            | 1.91899100 | -3.26465700 | 0.02151700   |
| H                                            | 4.95178900 | -3.90317900 | 0.01285900   |
| H                                            | 4.01668100 | -3.37225500 | 1.43699500   |
| H                                            | 5.47771900 | -2.47073200 | 0.94484900   |
| H                                            | 4.92528500 | -2.48779500 | -2.11551600  |
| H                                            | 5.42081600 | -1.04300700 | -1.18734000  |
| H                                            | 3.93513900 | -1.00599800 | -2.17932600  |
| C                                            | 1.90312400 | 3.69901400  | 0.53305000   |
| H                                            | 1.24458600 | 4.07873300  | 1.32694400   |
| H                                            | 2.94614800 | 3.79453000  | 0.86939500   |
| H                                            | 1.76712100 | 4.33568900  | -0.35212000  |

|   |             |             |             |
|---|-------------|-------------|-------------|
| C | 2.46964500  | 1.79992400  | -0.98070700 |
| H | 2.26895200  | 0.76427200  | -1.28302100 |
| H | 2.26985300  | 2.45541500  | -1.84196600 |
| H | 3.53861100  | 1.89270300  | -0.73363500 |
| N | -0.64938800 | 3.12307200  | -0.34473100 |
| C | -1.91874600 | 2.96866900  | -0.74984100 |
| N | -2.52795800 | 1.82995000  | -1.05115800 |
| C | -1.73740100 | 0.77200600  | -0.91138400 |
| C | -0.39186200 | 0.79772700  | -0.50211100 |
| C | 0.14803400  | 2.06457800  | -0.21051500 |
| N | -2.03153200 | -0.54654200 | -1.13637400 |
| C | -0.88825300 | -1.24091000 | -0.85833200 |
| N | 0.11241700  | -0.48650000 | -0.48015800 |
| C | -4.30559700 | -1.09534800 | -0.36725100 |
| C | -5.28543000 | -0.10467100 | -0.25494800 |
| C | -6.16417800 | -0.10231200 | 0.82944700  |
| C | -6.06598500 | -1.08865400 | 1.81076900  |
| C | -5.08713900 | -2.07926000 | 1.70558700  |
| C | -4.21155500 | -2.08215900 | 0.62094400  |
| C | -3.33113200 | -1.08524200 | -1.52345200 |
| H | -2.51262000 | 3.88255100  | -0.84114500 |
| H | -0.85874900 | -2.32651000 | -0.96161700 |
| H | -5.35357000 | 0.67139900  | -1.02056500 |
| H | -6.92762700 | 0.67387700  | 0.90724400  |
| H | -6.75394800 | -1.08728600 | 2.65822100  |
| H | -5.00971000 | -2.85500600 | 2.46954000  |
| H | -3.44943300 | -2.86129100 | 0.53558000  |
| H | -3.15552000 | -2.10193800 | -1.89672800 |
| H | -3.71759000 | -0.47203400 | -2.34788600 |

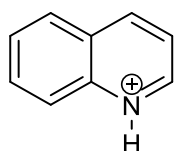

quinolin-1-H<sup>+</sup>

|                                              |             |             |                             |
|----------------------------------------------|-------------|-------------|-----------------------------|
| Zero-point correction=                       |             |             | 0.150691 (Hartree/Particle) |
| Thermal correction to Energy=                |             |             | 0.157467                    |
| Thermal correction to Enthalpy=              |             |             | 0.158411                    |
| Thermal correction to Gibbs Free Energy=     |             |             | 0.119448                    |
| Sum of electronic and zero-point Energies=   |             |             | -401.777673                 |
| Sum of electronic and thermal Energies=      |             |             | -401.770897                 |
| Sum of electronic and thermal Enthalpies=    |             |             | -401.769953                 |
| Sum of electronic and thermal Free Energies= |             |             | -401.808916                 |
| C                                            | -0.01861300 | 0.74533900  | 0.00000000                  |
| C                                            | -0.01537800 | -0.67263200 | 0.00000000                  |
| N                                            | 1.19716900  | -1.30884600 | 0.00000000                  |
| C                                            | 2.36218400  | -0.68110400 | 0.00000000                  |
| C                                            | 2.40973500  | 0.71838800  | 0.00000000                  |
| C                                            | 1.22602400  | 1.42378800  | 0.00000000                  |
| C                                            | -1.26923000 | 1.41894200  | 0.00000000                  |
| C                                            | -2.43784600 | 0.69737500  | 0.00000000                  |
| C                                            | -2.40986400 | -0.72067400 | 0.00000000                  |
| C                                            | -1.21902100 | -1.40928600 | 0.00000000                  |
| H                                            | 3.25485800  | -1.30685800 | 0.00000000                  |
| H                                            | 3.37785000  | 1.21584500  | 0.00000000                  |
| H                                            | 1.23000900  | 2.51580100  | 0.00000000                  |
| H                                            | -1.27507000 | 2.51005700  | 0.00000000                  |
| H                                            | -3.39850600 | 1.21337800  | 0.00000000                  |
| H                                            | -3.34976100 | -1.27437100 | 0.00000000                  |
| H                                            | -1.18260000 | -2.49990000 | 0.00000000                  |
| H                                            | 1.19509100  | -2.33284000 | 0.00000000                  |

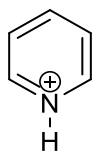

pyridin-1-H<sup>+</sup>

|                                              |             |             |                             |
|----------------------------------------------|-------------|-------------|-----------------------------|
| Zero-point correction=                       |             |             | 0.103480 (Hartree/Particle) |
| Thermal correction to Energy=                |             |             | 0.107831                    |
| Thermal correction to Enthalpy=              |             |             | 0.108775                    |
| Thermal correction to Gibbs Free Energy=     |             |             | 0.076000                    |
| Sum of electronic and zero-point Energies=   |             |             | -248.349381                 |
| Sum of electronic and thermal Energies=      |             |             | -248.345030                 |
| Sum of electronic and thermal Enthalpies=    |             |             | -248.344086                 |
| Sum of electronic and thermal Free Energies= |             |             | -248.376861                 |
| C                                            | -0.71550400 | 1.20849500  | 0.00000000                  |
| C                                            | 0.66767100  | 1.18239200  | 0.00000000                  |
| N                                            | 1.30103800  | -0.00000300 | 0.00000100                  |
| C                                            | 0.66766700  | -1.18239400 | 0.00000000                  |
| C                                            | -0.71550900 | -1.20849200 | -0.00000100                 |
| C                                            | -1.41271700 | 0.00000300  | -0.00000100                 |
| H                                            | -1.23334900 | 2.16650700  | 0.00000000                  |
| H                                            | 1.29433900  | 2.07345200  | 0.00000100                  |
| H                                            | 1.29433000  | -2.07345700 | 0.00000000                  |
| H                                            | -1.23335700 | -2.16650200 | -0.00000100                 |
| H                                            | -2.50372800 | 0.00000500  | -0.00000100                 |
| H                                            | 2.32484600  | -0.00000500 | 0.00000100                  |

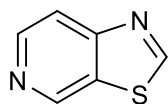

thiazolo[5,4-c]pyridine

|                                          |  |  |                             |
|------------------------------------------|--|--|-----------------------------|
| Zero-point correction=                   |  |  | 0.092362 (Hartree/Particle) |
| Thermal correction to Energy=            |  |  | 0.098402                    |
| Thermal correction to Enthalpy=          |  |  | 0.099347                    |
| Thermal correction to Gibbs Free Energy= |  |  | 0.061580                    |

|                                              |             |             |             |
|----------------------------------------------|-------------|-------------|-------------|
| Sum of electronic and zero-point Energies=   |             |             | -738.123909 |
| Sum of electronic and thermal Energies=      |             |             | -738.117869 |
| Sum of electronic and thermal Enthalpies=    |             |             | -738.116924 |
| Sum of electronic and thermal Free Energies= |             |             | -738.154691 |
| C                                            | -2.44734900 | 0.41266400  | 0.00013400  |
| C                                            | -1.41318300 | 1.33604000  | 0.00013000  |
| C                                            | -0.10435100 | 0.83541300  | 0.00003100  |
| C                                            | 0.07534400  | -0.56207100 | -0.00004100 |
| C                                            | -1.03926100 | -1.41020400 | -0.00002900 |
| N                                            | 1.06381900  | 1.57363000  | -0.00003600 |
| C                                            | 2.08802700  | 0.79233000  | -0.00029800 |
| S                                            | 1.77258400  | -0.92557700 | 0.00001600  |
| H                                            | -3.48380400 | 0.76064200  | 0.00020400  |
| H                                            | -1.60308500 | 2.40949200  | 0.00018600  |
| H                                            | -0.91929500 | -2.49769800 | -0.00004000 |
| H                                            | 3.12384500  | 1.14257400  | -0.00030700 |
| N                                            | -2.26872800 | -0.92088800 | 0.00005600  |

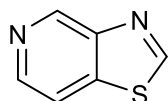

thiazolo[4,5-c]pyridine

|                                              |            |            |                             |
|----------------------------------------------|------------|------------|-----------------------------|
| Zero-point correction=                       |            |            | 0.092328 (Hartree/Particle) |
| Thermal correction to Energy=                |            |            | 0.098371                    |
| Thermal correction to Enthalpy=              |            |            | 0.099315                    |
| Thermal correction to Gibbs Free Energy=     |            |            | 0.061545                    |
| Sum of electronic and zero-point Energies=   |            |            | -738.124257                 |
| Sum of electronic and thermal Energies=      |            |            | -738.118214                 |
| Sum of electronic and thermal Enthalpies=    |            |            | -738.117270                 |
| Sum of electronic and thermal Free Energies= |            |            | -738.155041                 |
| C                                            | 1.40521300 | 1.32894800 | -0.00012800                 |
| C                                            | 0.09720200 | 0.81885500 | -0.00002700                 |

|   |             |             |             |
|---|-------------|-------------|-------------|
| C | -0.07391500 | -0.57920400 | 0.00001800  |
| C | 1.04311700  | -1.41904400 | -0.00004700 |
| N | -1.07020400 | 1.55843300  | 0.00002700  |
| C | -2.09339500 | 0.77986000  | 0.00006000  |
| S | -1.76935100 | -0.94334000 | 0.00019500  |
| H | 1.56220800  | 2.41232700  | -0.00017000 |
| H | 0.95822800  | -2.50564800 | -0.00001000 |
| H | -3.13040500 | 1.12582800  | 0.00013200  |
| C | 2.28390000  | -0.79614000 | -0.00015700 |
| H | 3.19023900  | -1.40803500 | -0.00020700 |
| N | 2.46400500  | 0.53718300  | -0.00019500 |

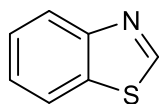

benzothiazole

|                                              |             |             |                             |
|----------------------------------------------|-------------|-------------|-----------------------------|
| Zero-point correction=                       |             |             | 0.104063 (Hartree/Particle) |
| Thermal correction to Energy=                |             |             | 0.110230                    |
| Thermal correction to Enthalpy=              |             |             | 0.111174                    |
| Thermal correction to Gibbs Free Energy=     |             |             | 0.073238                    |
| Sum of electronic and zero-point Energies=   |             |             | -722.093818                 |
| Sum of electronic and thermal Energies=      |             |             | -722.087651                 |
| Sum of electronic and thermal Enthalpies=    |             |             | -722.086706                 |
| Sum of electronic and thermal Free Energies= |             |             | -722.124643                 |
| C                                            | 2.28446100  | -0.88520600 | 0.00013400                  |
| C                                            | 2.46920900  | 0.51065400  | -0.00003100                 |
| C                                            | 1.38411300  | 1.37339400  | -0.00012600                 |
| C                                            | 0.08849400  | 0.83199600  | -0.00006100                 |
| C                                            | -0.08242500 | -0.56970800 | 0.00008100                  |
| C                                            | 1.01238500  | -1.44166200 | 0.00019100                  |
| N                                            | -1.08846600 | 1.56242700  | 0.00009900                  |
| C                                            | -2.11054500 | 0.78138200  | 0.00048800                  |

|   |             |             |             |
|---|-------------|-------------|-------------|
| S | -1.78300800 | -0.93605000 | -0.00034500 |
| H | 3.15524400  | -1.54280200 | 0.00016100  |
| H | 3.48196000  | 0.91653000  | -0.00007900 |
| H | 1.51228000  | 2.45677800  | -0.00019500 |
| H | 0.87126900  | -2.52329600 | 0.00021000  |
| H | -3.14752100 | 1.12748900  | 0.00066400  |

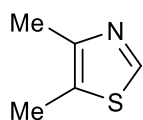

thiazole

|                                              |             |             |                             |
|----------------------------------------------|-------------|-------------|-----------------------------|
| Zero-point correction=                       |             |             | 0.111305 (Hartree/Particle) |
| Thermal correction to Energy=                |             |             | 0.118531                    |
| Thermal correction to Enthalpy=              |             |             | 0.119476                    |
| Thermal correction to Gibbs Free Energy=     |             |             | 0.079652                    |
| Sum of electronic and zero-point Energies=   |             |             | -647.141984                 |
| Sum of electronic and thermal Energies=      |             |             | -647.134758                 |
| Sum of electronic and thermal Enthalpies=    |             |             | -647.133814                 |
| Sum of electronic and thermal Free Energies= |             |             | -647.173638                 |
| C                                            | 1.26886200  | -1.27305700 | 0.00093900                  |
| N                                            | 0.02225100  | -1.61634000 | 0.00075000                  |
| C                                            | -0.81102000 | -0.51479400 | -0.00122600                 |
| C                                            | -0.16810900 | 0.69858100  | -0.00106100                 |
| S                                            | 1.54704800  | 0.43170700  | -0.00041100                 |
| H                                            | 2.10515500  | -1.97601800 | 0.00089000                  |
| C                                            | -0.72637900 | 2.08526700  | 0.00081300                  |
| H                                            | -1.82278200 | 2.05639400  | 0.01596500                  |
| H                                            | -0.38998800 | 2.65001400  | 0.88276100                  |
| H                                            | -0.41270800 | 2.64488300  | -0.89282700                 |
| C                                            | -2.29053700 | -0.74659300 | -0.00037900                 |
| H                                            | -2.59945300 | -1.25586500 | 0.92496000                  |

|   |             |             |             |
|---|-------------|-------------|-------------|
| H | -2.85490400 | 0.18931400  | -0.08391100 |
| H | -2.57075300 | -1.39807900 | -0.84102400 |

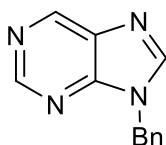

9-benzyl-9H-purine

Zero-point correction= 0.207481 (Hartree/Particle)

Thermal correction to Energy= 0.218922

Thermal correction to Enthalpy= 0.219866

Thermal correction to Gibbs Free Energy= 0.167737

Sum of electronic and zero-point Energies= -681.353328

Sum of electronic and thermal Energies= -681.341887

Sum of electronic and thermal Enthalpies= -681.340943

Sum of electronic and thermal Free Energies= -681.393072

|   |             |             |             |
|---|-------------|-------------|-------------|
| N | 3.45633500  | -1.46479900 | -0.54831900 |
| C | 2.47950500  | -1.93349400 | 0.24107900  |
| N | 1.44334400  | -1.25162100 | 0.71822000  |
| C | 1.43481500  | 0.01901600  | 0.33999500  |
| C | 2.40026000  | 0.63958200  | -0.48301300 |
| C | 3.43621500  | -0.18655000 | -0.91907900 |
| N | 0.53235100  | 0.99802900  | 0.64653600  |
| C | 0.97600500  | 2.12953000  | 0.01241800  |
| N | 2.08043700  | 1.96560400  | -0.66645500 |
| C | -1.81700900 | 0.24798300  | 0.61973100  |
| C | -2.67354000 | 1.08751200  | -0.10052900 |
| C | -3.69952900 | 0.54965100  | -0.87722800 |
| C | -3.87704200 | -0.83342900 | -0.93925500 |
| C | -3.02643000 | -1.67608000 | -0.22237000 |
| C | -2.00001000 | -1.13760000 | 0.55398500  |
| C | -0.68527400 | 0.83316600  | 1.43391800  |



|   |             |             |             |
|---|-------------|-------------|-------------|
| H | 2.54319000  | -2.98896500 | 0.52014400  |
| H | 4.24127300  | 0.18181300  | -1.56245500 |
| H | 0.41735600  | 3.06165400  | 0.10643200  |
| H | -2.53837200 | 2.17070400  | -0.04620300 |
| H | -4.36568800 | 1.21259900  | -1.43226500 |
| H | -4.68176100 | -1.25483300 | -1.54444100 |
| H | -3.16446900 | -2.75796400 | -0.26524900 |
| H | -1.32929300 | -1.79399400 | 1.11283200  |
| H | -0.95655600 | 1.82266700  | 1.82168800  |
| H | -0.44073800 | 0.18010700  | 2.28174100  |

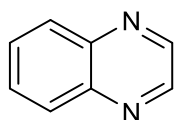

quinoxaline

|                                              |             |             |                             |
|----------------------------------------------|-------------|-------------|-----------------------------|
| Zero-point correction=                       |             |             | 0.125385 (Hartree/Particle) |
| Thermal correction to Energy=                |             |             | 0.131831                    |
| Thermal correction to Enthalpy=              |             |             | 0.132775                    |
| Thermal correction to Gibbs Free Energy=     |             |             | 0.094376                    |
| Sum of electronic and zero-point Energies=   |             |             | -417.364447                 |
| Sum of electronic and thermal Energies=      |             |             | -417.358001                 |
| Sum of electronic and thermal Enthalpies=    |             |             | -417.357057                 |
| Sum of electronic and thermal Free Energies= |             |             | -417.395456                 |
| C                                            | -2.37704700 | 0.70978100  | 0.00000000                  |
| C                                            | -1.19419000 | 1.40920000  | 0.00000000                  |
| C                                            | 0.04261400  | 0.71176200  | 0.00000100                  |
| C                                            | 0.04261400  | -0.71176200 | 0.00000100                  |
| C                                            | -1.19419000 | -1.40920000 | 0.00000000                  |
| C                                            | -2.37704700 | -0.70978100 | -0.00000100                 |
| H                                            | -3.32744900 | 1.24578100  | -0.00000100                 |
| H                                            | -1.16900300 | 2.50000700  | 0.00000000                  |

|   |             |             |             |
|---|-------------|-------------|-------------|
| H | -1.16900300 | -2.50000700 | 0.00000000  |
| H | -3.32744900 | -1.24578100 | -0.00000100 |
| C | 2.31812400  | -0.71367900 | -0.00000200 |
| C | 2.31812400  | 0.71367900  | -0.00000300 |
| H | 3.27064500  | -1.25201400 | 0.00000200  |
| H | 3.27064500  | 1.25201400  | 0.00000300  |
| N | 1.21268500  | -1.40916200 | 0.00000100  |
| N | 1.21268500  | 1.40916200  | 0.00000100  |

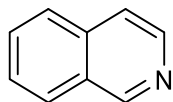

isoquinoline

Zero-point correction= 0.137269 (Hartree/Particle)

Thermal correction to Energy= 0.143889

Thermal correction to Enthalpy= 0.144833

Thermal correction to Gibbs Free Energy= 0.106132

Sum of electronic and zero-point Energies= -401.333259

Sum of electronic and thermal Energies= -401.326640

Sum of electronic and thermal Enthalpies= -401.325696

Sum of electronic and thermal Free Energies= -401.364397

|   |             |             |             |
|---|-------------|-------------|-------------|
| C | -2.41167200 | -0.70572300 | -0.00002700 |
| C | -1.22647800 | -1.40071600 | -0.00006800 |
| C | 0.00773400  | -0.69685800 | -0.00003700 |
| C | 0.01178600  | 0.72440300  | 0.00003900  |
| C | -1.22969800 | 1.41844000  | 0.00008000  |
| C | -2.41027000 | 0.71471200  | 0.00004700  |
| H | 1.27651600  | -2.46004700 | -0.00013500 |
| H | -3.36231300 | -1.24128000 | -0.00005100 |
| H | -1.21363300 | -2.49297800 | -0.00012500 |
| C | 1.26654000  | -1.36332500 | -0.00007800 |
| C | 1.27501000  | 1.37413400  | 0.00006800  |

|   |             |             |             |
|---|-------------|-------------|-------------|
| H | -1.22659800 | 2.51032700  | 0.00013600  |
| H | -3.36184400 | 1.24935200  | 0.00007900  |
| C | 2.41927700  | 0.61550500  | 0.00002300  |
| H | 1.32988500  | 2.46418600  | 0.00012600  |
| H | 3.40090200  | 1.09707600  | 0.00004400  |
| N | 2.42053100  | -0.74429500 | -0.00005100 |

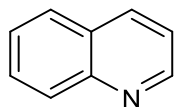

quinoline

Zero-point correction= 0.137206 (Hartree/Particle)

Thermal correction to Energy= 0.143799

Thermal correction to Enthalpy= 0.144744

Thermal correction to Gibbs Free Energy= 0.106113

Sum of electronic and zero-point Energies= -401.335028

Sum of electronic and thermal Energies= -401.328435

Sum of electronic and thermal Enthalpies= -401.327491

Sum of electronic and thermal Free Energies= -401.366121

|   |             |             |            |
|---|-------------|-------------|------------|
| C | 2.39836800  | -0.71525800 | 0.00000000 |
| C | 1.20974400  | -1.40439600 | 0.00000000 |
| C | -0.02871100 | -0.70415900 | 0.00000000 |
| C | -0.01552400 | 0.72064800  | 0.00000000 |
| C | 1.22936100  | 1.40733400  | 0.00000000 |
| C | 2.40989500  | 0.70413600  | 0.00000000 |
| H | 3.34425600  | -1.25975400 | 0.00000000 |
| H | 1.17968800  | -2.49526900 | 0.00000000 |
| C | -1.26765800 | 1.39154800  | 0.00000000 |
| H | 1.22596900  | 2.49957200  | 0.00000000 |
| H | 3.36352400  | 1.23448500  | 0.00000000 |
| C | -2.42206100 | 0.65165900  | 0.00000000 |
| C | -2.32326500 | -0.76537100 | 0.00000000 |

|   |             |             |            |
|---|-------------|-------------|------------|
| H | -1.29074000 | 2.48387400  | 0.00000000 |
| H | -3.40422000 | 1.12500300  | 0.00000000 |
| H | -3.24142900 | -1.36279300 | 0.00000000 |
| N | -1.18827700 | -1.42028100 | 0.00000000 |

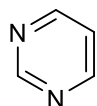

pyrimidine

|                                              |  |  |                             |
|----------------------------------------------|--|--|-----------------------------|
| Zero-point correction=                       |  |  | 0.077941 (Hartree/Particle) |
| Thermal correction to Energy=                |  |  | 0.082095                    |
| Thermal correction to Enthalpy=              |  |  | 0.083040                    |
| Thermal correction to Gibbs Free Energy=     |  |  | 0.050603                    |
| Sum of electronic and zero-point Energies=   |  |  | -263.944314                 |
| Sum of electronic and thermal Energies=      |  |  | -263.940159                 |
| Sum of electronic and thermal Enthalpies=    |  |  | -263.939215                 |
| Sum of electronic and thermal Free Energies= |  |  | -263.971652                 |

|   |             |             |            |
|---|-------------|-------------|------------|
| C | -1.31460600 | 0.00000000  | 0.00000000 |
| C | 0.62079900  | -1.18251000 | 0.00000000 |
| C | 1.35478400  | 0.00000000  | 0.00000000 |
| C | 0.62079900  | 1.18251000  | 0.00000000 |
| H | -2.40939800 | 0.00000000  | 0.00000000 |
| H | 1.12333100  | -2.15467500 | 0.00000000 |
| H | 2.44438800  | 0.00000000  | 0.00000000 |
| H | 1.12333200  | 2.15467500  | 0.00000000 |
| N | -0.71230800 | 1.18623100  | 0.00000000 |
| N | -0.71230800 | -1.18623100 | 0.00000000 |

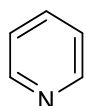

pyridine

|                               |  |  |                             |
|-------------------------------|--|--|-----------------------------|
| Zero-point correction=        |  |  | 0.089654 (Hartree/Particle) |
| Thermal correction to Energy= |  |  | 0.093898                    |

|                                              |            |             |             |
|----------------------------------------------|------------|-------------|-------------|
| Thermal correction to Enthalpy=              |            |             | 0.094842    |
| Thermal correction to Gibbs Free Energy=     |            |             | 0.062268    |
| Sum of electronic and zero-point Energies=   |            |             | -247.906176 |
| Sum of electronic and thermal Energies=      |            |             | -247.901932 |
| Sum of electronic and thermal Enthalpies=    |            |             | -247.900988 |
| Sum of electronic and thermal Free Energies= |            |             | -247.933562 |
| C                                            | 0.00000000 | 0.72347200  | 1.14262900  |
| C                                            | 0.00000000 | -0.67063600 | 1.19797600  |
| C                                            | 0.00000000 | -1.38201100 | 0.00000000  |
| C                                            | 0.00000000 | -0.67063600 | -1.19797600 |
| C                                            | 0.00000000 | 0.72347200  | -1.14262900 |
| H                                            | 0.00000000 | 1.30741400  | 2.06857100  |
| H                                            | 0.00000000 | -1.18197500 | 2.16128400  |
| H                                            | 0.00000000 | -2.47376800 | 0.00000000  |
| H                                            | 0.00000000 | -1.18197500 | -2.16128400 |
| H                                            | 0.00000000 | 1.30741400  | -2.06857100 |
| N                                            | 0.00000000 | 1.41156000  | 0.00000000  |

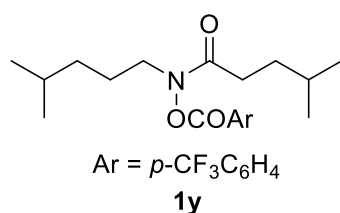

|                                              |            |             |                             |
|----------------------------------------------|------------|-------------|-----------------------------|
| Zero-point correction=                       |            |             | 0.460114 (Hartree/Particle) |
| Thermal correction to Energy=                |            |             | 0.488375                    |
| Thermal correction to Enthalpy=              |            |             | 0.489319                    |
| Thermal correction to Gibbs Free Energy=     |            |             | 0.397644                    |
| Sum of electronic and zero-point Energies=   |            |             | -1356.936718                |
| Sum of electronic and thermal Energies=      |            |             | -1356.908457                |
| Sum of electronic and thermal Enthalpies=    |            |             | -1356.907513                |
| Sum of electronic and thermal Free Energies= |            |             | -1356.999188                |
| N                                            | 1.77029200 | -0.20717200 | 0.98516000                  |

|   |            |             |             |
|---|------------|-------------|-------------|
| C | 2.20488000 | -1.03534900 | 2.09797000  |
| C | 2.34618800 | -2.52421800 | 1.79351600  |
| C | 3.53662500 | -2.87731200 | 0.89589600  |
| C | 3.30533600 | -2.74784700 | -0.61582800 |
| C | 4.63949600 | -2.77497300 | -1.35667300 |
| C | 2.37881400 | -3.84697600 | -1.13038000 |
| H | 1.40240100 | -2.90699200 | 1.37055400  |
| H | 2.46804900 | -3.02326900 | 2.76748800  |
| H | 3.84655800 | -3.91775200 | 1.09866500  |
| H | 4.38799400 | -2.23957300 | 1.18751100  |
| H | 2.81700500 | -1.78219200 | -0.81323200 |
| H | 4.49470200 | -2.73049000 | -2.44723000 |
| H | 5.19455500 | -3.70121200 | -1.13122700 |
| H | 5.27186700 | -1.92294500 | -1.06434100 |
| H | 2.16550700 | -3.71603100 | -2.20243300 |
| H | 1.41390200 | -3.84696400 | -0.60338100 |
| H | 2.84324800 | -4.83889900 | -0.99796900 |
| C | 2.59218100 | 0.59474400  | 0.23640600  |
| C | 1.92093800 | 1.52598500  | -0.75289400 |
| H | 1.62059600 | 0.90363100  | -1.61279900 |
| H | 0.99143300 | 1.92779300  | -0.32735300 |
| C | 2.84881400 | 2.64218700  | -1.21632700 |
| H | 3.74370500 | 2.19496800  | -1.67543600 |
| H | 2.33071900 | 3.20884100  | -2.00826300 |
| C | 3.28984300 | 3.61868600  | -0.11860200 |
| H | 3.90833100 | 3.05410700  | 0.59846900  |
| C | 2.10359700 | 4.21354600  | 0.63828000  |
| H | 2.44162800 | 4.97501300  | 1.35744700  |
| H | 1.39715900 | 4.69764300  | -0.05695100 |
| H | 1.54952900 | 3.45058200  | 1.20594500  |

|   |             |             |             |
|---|-------------|-------------|-------------|
| C | 4.15347500  | 4.72143800  | -0.72554200 |
| H | 5.01191800  | 4.30231600  | -1.27252600 |
| H | 3.56711200  | 5.32802500  | -1.43536000 |
| H | 4.54410500  | 5.39783400  | 0.04968800  |
| O | 3.79932900  | 0.50131700  | 0.36024400  |
| H | 3.16932000  | -0.62436800 | 2.42594800  |
| H | 1.47490600  | -0.87420500 | 2.90439500  |
| O | 0.40744400  | -0.01915400 | 0.91082000  |
| C | -0.22953200 | -0.69777800 | -0.08585900 |
| O | 0.33491600  | -1.38531300 | -0.88401100 |
| C | -1.69755500 | -0.44013400 | -0.04823600 |
| C | -2.48038200 | -1.05470000 | -1.02901800 |
| C | -2.28592300 | 0.38011000  | 0.92231300  |
| C | -3.85704700 | -0.85286200 | -1.04607200 |
| H | -2.00400600 | -1.69042700 | -1.77605100 |
| C | -3.66122900 | 0.58152900  | 0.90637400  |
| H | -1.67440200 | 0.85708800  | 1.68734000  |
| C | -4.43732000 | -0.03552300 | -0.07731100 |
| H | -4.47326000 | -1.33075700 | -1.80779500 |
| H | -4.12995900 | 1.21659700  | 1.66012500  |
| C | -5.92024200 | 0.22463000  | -0.08631200 |
| F | -6.57531400 | -0.59768400 | -0.90562200 |
| F | -6.19565800 | 1.47315100  | -0.47948000 |
| F | -6.45190900 | 0.08185900  | 1.13132600  |

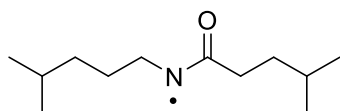

**1y-radical**

|                                 |                             |
|---------------------------------|-----------------------------|
| Zero-point correction=          | 0.344210 (Hartree/Particle) |
| Thermal correction to Energy=   | 0.361718                    |
| Thermal correction to Enthalpy= | 0.362662                    |

|                                              |             |             |             |
|----------------------------------------------|-------------|-------------|-------------|
| Thermal correction to Gibbs Free Energy=     |             |             | 0.296122    |
| Sum of electronic and zero-point Energies=   |             |             | -600.583861 |
| Sum of electronic and thermal Energies=      |             |             | -600.566353 |
| Sum of electronic and thermal Enthalpies=    |             |             | -600.565409 |
| Sum of electronic and thermal Free Energies= |             |             | -600.631949 |
| N                                            | 0.48790600  | 1.16239000  | 0.66544600  |
| C                                            | 1.08829600  | 1.97318500  | -0.35213500 |
| C                                            | 2.60317000  | 1.73483100  | -0.46287800 |
| C                                            | 2.95765000  | 0.32870200  | -0.95126700 |
| C                                            | 2.98550200  | -0.75063600 | 0.14048500  |
| C                                            | 2.89527600  | -2.14186500 | -0.47952000 |
| C                                            | 4.23305900  | -0.62610200 | 1.01308200  |
| H                                            | 3.07305800  | 1.94200500  | 0.51170500  |
| H                                            | 2.98506700  | 2.48773000  | -1.16842200 |
| H                                            | 3.94873400  | 0.34767200  | -1.43697600 |
| H                                            | 2.23250600  | 0.03772800  | -1.72920900 |
| H                                            | 2.10576600  | -0.60860900 | 0.79117100  |
| H                                            | 2.94252500  | -2.92851700 | 0.28912200  |
| H                                            | 3.72847400  | -2.30939100 | -1.18231200 |
| H                                            | 1.95284800  | -2.26267200 | -1.03436300 |
| H                                            | 4.21929000  | -1.35989100 | 1.83323900  |
| H                                            | 4.32372100  | 0.37433500  | 1.46288300  |
| H                                            | 5.14069800  | -0.80815300 | 0.41419900  |
| C                                            | -0.43514900 | 0.20336300  | 0.26587400  |
| C                                            | -1.50020600 | -0.09951800 | 1.29092500  |
| H                                            | -0.98975200 | -0.66337100 | 2.09047000  |
| H                                            | -1.81412000 | 0.84737100  | 1.75667500  |
| C                                            | -2.67160300 | -0.89735700 | 0.73536100  |
| H                                            | -2.28301500 | -1.83220600 | 0.30189600  |
| H                                            | -3.32958500 | -1.18338400 | 1.57310000  |



|   |             |             |             |
|---|-------------|-------------|-------------|
| C | -3.51076200 | -0.17139200 | -0.32383000 |
| H | -2.85019900 | 0.05840500  | -1.17705200 |
| C | -4.08992800 | 1.14130500  | 0.19999100  |
| H | -4.73536900 | 1.61356400  | -0.55605400 |
| H | -4.70160500 | 0.96429400  | 1.10056600  |
| H | -3.30577500 | 1.86717100  | 0.46181800  |
| C | -4.62395500 | -1.08974200 | -0.82240500 |
| H | -4.21907500 | -2.03358900 | -1.21838700 |
| H | -5.31708800 | -1.33982000 | -0.00229100 |
| H | -5.20940700 | -0.61143300 | -1.62202900 |
| O | -0.30583200 | -0.40126000 | -0.78270400 |
| H | 0.61217700  | 1.82265400  | -1.33537300 |
| H | 0.93333600  | 3.02281600  | -0.04297400 |

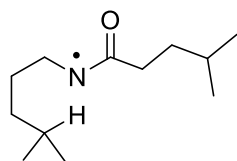

**1y-iso1**

|                                              |             |             |                             |
|----------------------------------------------|-------------|-------------|-----------------------------|
| Zero-point correction=                       |             |             | 0.344300 (Hartree/Particle) |
| Thermal correction to Energy=                |             |             | 0.361795                    |
| Thermal correction to Enthalpy=              |             |             | 0.362739                    |
| Thermal correction to Gibbs Free Energy=     |             |             | 0.297077                    |
| Sum of electronic and zero-point Energies=   |             |             | -600.586151                 |
| Sum of electronic and thermal Energies=      |             |             | -600.568656                 |
| Sum of electronic and thermal Enthalpies=    |             |             | -600.567712                 |
| Sum of electronic and thermal Free Energies= |             |             | -600.633375                 |
| N                                            | -0.15591500 | 0.95072000  | -0.46419100                 |
| C                                            | -1.24290000 | 1.84748600  | -0.73943400                 |
| C                                            | -2.42402400 | 1.12701400  | -1.39690600                 |
| C                                            | -3.27168500 | 0.30495600  | -0.42580900                 |
| C                                            | -2.55194700 | -0.80874200 | 0.34318100                  |

|   |             |             |             |
|---|-------------|-------------|-------------|
| C | -3.52699400 | -1.50291500 | 1.29139200  |
| C | -1.89332900 | -1.82351000 | -0.58870300 |
| H | -2.04180500 | 0.50151300  | -2.21862200 |
| H | -3.06436700 | 1.89386900  | -1.85702000 |
| H | -4.10640700 | -0.14812100 | -0.98955000 |
| H | -3.73143400 | 0.99240400  | 0.30490100  |
| H | -1.76342300 | -0.34494100 | 0.96441700  |
| H | -3.01936500 | -2.27174600 | 1.89331400  |
| H | -4.33241500 | -1.99791100 | 0.72439100  |
| H | -3.99471200 | -0.78535000 | 1.98263100  |
| H | -1.40357800 | -2.62680600 | -0.01628300 |
| H | -1.13254600 | -1.35714800 | -1.23095500 |
| H | -2.64841400 | -2.29211900 | -1.24217100 |
| C | 0.56667700  | 1.12965500  | 0.70480100  |
| C | 1.12427400  | -0.13018000 | 1.32303800  |
| H | 0.93535900  | -0.07007200 | 2.40490000  |
| H | 0.59109900  | -1.00646700 | 0.92771900  |
| C | 2.63355300  | -0.24137000 | 1.07288900  |
| H | 3.12654100  | 0.62359200  | 1.54522600  |
| H | 3.00748600  | -1.14204700 | 1.58824200  |
| C | 3.04070000  | -0.30760700 | -0.40286500 |
| H | 2.70825900  | 0.62588000  | -0.89326100 |
| C | 2.38222400  | -1.48031000 | -1.12664100 |
| H | 2.74629700  | -1.55485300 | -2.16260100 |
| H | 2.61646300  | -2.43066600 | -0.61830600 |
| H | 1.28825900  | -1.37499100 | -1.16597900 |
| C | 4.56094500  | -0.38274400 | -0.51920500 |
| H | 5.04611300  | 0.46403400  | -0.01030800 |
| H | 4.93822400  | -1.31147900 | -0.06060500 |
| H | 4.88136500  | -0.37420800 | -1.57178700 |

|   |             |            |             |
|---|-------------|------------|-------------|
| O | 0.80859800  | 2.24386500 | 1.13032700  |
| H | -1.56211200 | 2.40606000 | 0.15773400  |
| H | -0.84722200 | 2.58520300 | -1.46373800 |

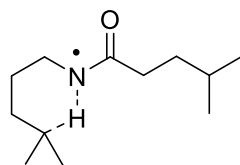

**TS4**

|                                              |            |             |                             |
|----------------------------------------------|------------|-------------|-----------------------------|
| Zero-point correction=                       |            |             | 0.340414 (Hartree/Particle) |
| Thermal correction to Energy=                |            |             | 0.356988                    |
| Thermal correction to Enthalpy=              |            |             | 0.357932                    |
| Thermal correction to Gibbs Free Energy=     |            |             | 0.295598                    |
| Sum of electronic and zero-point Energies=   |            |             | -600.578355                 |
| Sum of electronic and thermal Energies=      |            |             | -600.561781                 |
| Sum of electronic and thermal Enthalpies=    |            |             | -600.560836                 |
| Sum of electronic and thermal Free Energies= |            |             | -600.623170                 |
| N                                            | 0.39781000 | 0.78329600  | 0.41566900                  |
| C                                            | 1.37537300 | 1.70632100  | 0.94785200                  |
| C                                            | 2.61848400 | 0.94683500  | 1.41342200                  |
| C                                            | 3.22866100 | 0.15252800  | 0.25629700                  |
| C                                            | 2.25400800 | -0.88586900 | -0.28785400                 |
| C                                            | 2.38007500 | -1.14348700 | -1.77472600                 |
| C                                            | 2.16615500 | -2.14942400 | 0.54719900                  |
| H                                            | 2.34379200 | 0.26787600  | 2.23653300                  |
| H                                            | 3.34415100 | 1.66794000  | 1.81516300                  |
| H                                            | 4.15684200 | -0.34593500 | 0.58620300                  |
| H                                            | 3.50721400 | 0.85353700  | -0.54779000                 |
| H                                            | 1.20455400 | -0.32735900 | -0.10186800                 |
| H                                            | 1.63232300 | -1.86960600 | -2.12684200                 |
| H                                            | 3.37879400 | -1.55652100 | -2.00142500                 |
| H                                            | 2.26571300 | -0.21462900 | -2.35403900                 |

|   |             |             |             |
|---|-------------|-------------|-------------|
| H | 1.34588000  | -2.79942000 | 0.20749100  |
| H | 2.00783000  | -1.92433300 | 1.61235200  |
| H | 3.10524700  | -2.72287700 | 0.45918800  |
| C | -0.43055300 | 1.19771200  | -0.59821900 |
| C | -1.11988000 | 0.09813400  | -1.37850300 |
| H | -1.03008400 | 0.34793200  | -2.44598900 |
| H | -0.62030700 | -0.86627400 | -1.21079400 |
| C | -2.60285400 | 0.01813700  | -0.99997100 |
| H | -3.07874200 | 0.97729300  | -1.26071800 |
| H | -3.08522000 | -0.75610500 | -1.62070000 |
| C | -2.87510400 | -0.28964500 | 0.47681800  |
| H | -2.45637200 | 0.53585700  | 1.08113300  |
| C | -2.20552700 | -1.58650500 | 0.92751300  |
| H | -2.48806900 | -1.83441700 | 1.96204000  |
| H | -2.51182200 | -2.42818100 | 0.28374900  |
| H | -1.10851200 | -1.51109600 | 0.89434000  |
| C | -4.38004700 | -0.33850600 | 0.72871300  |
| H | -4.87058600 | 0.59422200  | 0.41098000  |
| H | -4.83986900 | -1.16807000 | 0.16684500  |
| H | -4.60246700 | -0.49289500 | 1.79529300  |
| O | -0.67614800 | 2.37878200  | -0.78950400 |
| H | 1.64555300  | 2.47441800  | 0.20287200  |
| H | 0.92591400  | 2.22792500  | 1.81108300  |

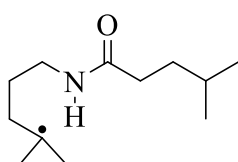

**1y-iso1-HAT**

|                                 |                             |
|---------------------------------|-----------------------------|
| Zero-point correction=          | 0.344332 (Hartree/Particle) |
| Thermal correction to Energy=   | 0.362291                    |
| Thermal correction to Enthalpy= | 0.363235                    |

|                                              |             |             |             |
|----------------------------------------------|-------------|-------------|-------------|
| Thermal correction to Gibbs Free Energy=     |             |             | 0.296018    |
| Sum of electronic and zero-point Energies=   |             |             | -600.610645 |
| Sum of electronic and thermal Energies=      |             |             | -600.592686 |
| Sum of electronic and thermal Enthalpies=    |             |             | -600.591742 |
| Sum of electronic and thermal Free Energies= |             |             | -600.658959 |
| N                                            | 0.28108900  | 0.70790200  | -0.02139200 |
| C                                            | 1.13770300  | 1.80051400  | -0.43501300 |
| C                                            | 2.45573100  | 1.82409100  | 0.33174300  |
| C                                            | 3.42222900  | 0.67755300  | -0.01280000 |
| H                                            | 2.24194500  | 1.82152900  | 1.41505600  |
| H                                            | 2.95424900  | 2.78290300  | 0.12073700  |
| H                                            | 4.37176500  | 0.88688600  | 0.51689200  |
| H                                            | 3.65201300  | 0.72457600  | -1.09048200 |
| H                                            | 0.17780700  | 0.54643800  | 0.97527000  |
| C                                            | -0.34224300 | -0.13633900 | -0.87596600 |
| C                                            | -1.11219600 | -1.26565900 | -0.21042000 |
| H                                            | -1.58732900 | -1.83496500 | -1.01944500 |
| H                                            | -0.38079600 | -1.93331600 | 0.27497700  |
| C                                            | -2.14673100 | -0.80310700 | 0.81970100  |
| H                                            | -2.72773200 | -1.68408800 | 1.14200100  |
| H                                            | -1.63939500 | -0.43176200 | 1.72625600  |
| C                                            | -3.11495000 | 0.27283800  | 0.31488800  |
| H                                            | -2.52612200 | 1.18619500  | 0.11395200  |
| C                                            | -4.14107800 | 0.60415300  | 1.39503800  |
| H                                            | -4.80367900 | 1.42445600  | 1.08046000  |
| H                                            | -4.77232600 | -0.27309600 | 1.61199600  |
| H                                            | -3.65183700 | 0.90540300  | 2.33398700  |
| C                                            | -3.79906900 | -0.13956000 | -0.98724100 |
| H                                            | -3.07539500 | -0.24551000 | -1.80888300 |
| H                                            | -4.32378100 | -1.10212900 | -0.86573800 |

|   |             |             |             |
|---|-------------|-------------|-------------|
| H | -4.54267200 | 0.61200000  | -1.29307400 |
| O | -0.28180400 | -0.01707500 | -2.09255200 |
| H | 1.31385500  | 1.68018900  | -1.51314600 |
| H | 0.61576900  | 2.76209600  | -0.29401200 |
| C | 2.95400900  | -0.70273500 | 0.34072900  |
| C | 2.63040700  | -1.02591700 | 1.76225000  |
| H | 3.20615900  | -0.39831900 | 2.46176700  |
| H | 1.55951000  | -0.86965200 | 2.00872000  |
| H | 2.84669500  | -2.08119700 | 1.99616900  |
| C | 2.65988600  | -1.68204200 | -0.74845200 |
| H | 3.54435500  | -1.85320100 | -1.38969200 |
| H | 2.34803100  | -2.65880600 | -0.34943300 |
| H | 1.86352600  | -1.32808300 | -1.43091200 |

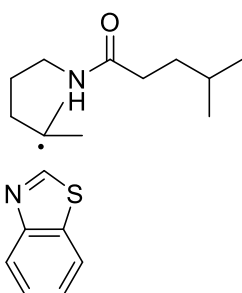

**Complex 1-1**

|                                              |             |            |                             |
|----------------------------------------------|-------------|------------|-----------------------------|
| Zero-point correction=                       |             |            | 0.449266 (Hartree/Particle) |
| Thermal correction to Energy=                |             |            | 0.475292                    |
| Thermal correction to Enthalpy=              |             |            | 0.476236                    |
| Thermal correction to Gibbs Free Energy=     |             |            | 0.387518                    |
| Sum of electronic and zero-point Energies=   |             |            | -1322.714369                |
| Sum of electronic and thermal Energies=      |             |            | -1322.688343                |
| Sum of electronic and thermal Enthalpies=    |             |            | -1322.687399                |
| Sum of electronic and thermal Free Energies= |             |            | -1322.776117                |
| N                                            | -2.64444300 | 0.96438500 | -0.31329700                 |
| C                                            | -2.25250000 | 2.06727100 | -1.16682100                 |
| C                                            | -1.16259800 | 2.92846900 | -0.53781700                 |

|   |             |             |             |
|---|-------------|-------------|-------------|
| C | 0.21554600  | 2.25304400  | -0.43853100 |
| H | -1.49378500 | 3.25254100  | 0.46443300  |
| H | -1.06489900 | 3.84582600  | -1.13905800 |
| H | 0.92659500  | 3.02328600  | -0.07795000 |
| H | 0.54911300  | 1.97827000  | -1.45353100 |
| H | -2.80997300 | 1.16559900  | 0.66791100  |
| C | -2.75026900 | -0.31860500 | -0.73083100 |
| C | -3.10471400 | -1.31572900 | 0.36009900  |
| H | -3.14031900 | -2.30254400 | -0.11856200 |
| H | -2.28130200 | -1.33284000 | 1.09314800  |
| C | -4.42396500 | -1.00194600 | 1.07328800  |
| H | -4.65972100 | -1.84194900 | 1.74891700  |
| H | -4.30066900 | -0.11807500 | 1.72177100  |
| C | -5.61237900 | -0.76817800 | 0.13358300  |
| H | -5.40582400 | 0.15243400  | -0.44243100 |
| C | -6.88774600 | -0.54155100 | 0.94049600  |
| H | -7.73587800 | -0.29185800 | 0.28534400  |
| H | -7.15592300 | -1.45003100 | 1.50441300  |
| H | -6.76563500 | 0.27919500  | 1.66386300  |
| C | -5.78796700 | -1.91398200 | -0.86100800 |
| H | -4.93068100 | -1.98847500 | -1.54583300 |
| H | -5.89230300 | -2.87691500 | -0.33339700 |
| H | -6.69155900 | -1.76598200 | -1.47167900 |
| O | -2.57052400 | -0.65750000 | -1.89320600 |
| H | -1.90837300 | 1.63135000  | -2.11520400 |
| H | -3.12967100 | 2.69634400  | -1.39386100 |
| C | 0.29474800  | 1.05218700  | 0.45572700  |
| C | -0.06315100 | 1.17679700  | 1.89999900  |
| H | 0.00712100  | 2.21915400  | 2.25046300  |
| H | -1.09678900 | 0.83730800  | 2.11675800  |

|   |             |             |             |
|---|-------------|-------------|-------------|
| H | 0.60202700  | 0.55972400  | 2.52819800  |
| C | 0.57627600  | -0.29176900 | -0.13096400 |
| H | 1.49261300  | -0.27586800 | -0.75077500 |
| H | 0.71082300  | -1.05901700 | 0.64711100  |
| H | -0.23040100 | -0.63797800 | -0.80589200 |
| C | 3.21205400  | 1.31877400  | 1.21010500  |
| N | 3.32515200  | 0.14147800  | 1.71732000  |
| C | 3.94260200  | -0.72042600 | 0.82627100  |
| C | 4.31481500  | -0.13692600 | -0.40508900 |
| S | 3.85305300  | 1.54165700  | -0.40185100 |
| C | 4.20177000  | -2.08069900 | 1.05577700  |
| C | 4.82068700  | -2.82144500 | 0.05997400  |
| C | 5.18714200  | -2.22737900 | -1.16220500 |
| C | 4.93980400  | -0.88305100 | -1.40996500 |
| H | 2.76216300  | 2.16966800  | 1.72836700  |
| H | 3.91051300  | -2.52847700 | 2.00699600  |
| H | 5.02699900  | -3.88018000 | 0.22414200  |
| H | 5.67279500  | -2.83165900 | -1.93003700 |
| H | 5.22239000  | -0.42553600 | -2.35905000 |

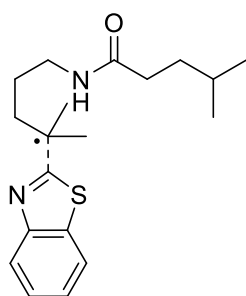

**TS6**

|                                            |                             |
|--------------------------------------------|-----------------------------|
| Zero-point correction=                     | 0.450327 (Hartree/Particle) |
| Thermal correction to Energy=              | 0.474751                    |
| Thermal correction to Enthalpy=            | 0.475696                    |
| Thermal correction to Gibbs Free Energy=   | 0.393681                    |
| Sum of electronic and zero-point Energies= | -1322.703607                |



|                                              |             |             |              |
|----------------------------------------------|-------------|-------------|--------------|
| Sum of electronic and thermal Energies=      |             |             | -1322.679183 |
| Sum of electronic and thermal Enthalpies=    |             |             | -1322.678238 |
| Sum of electronic and thermal Free Energies= |             |             | -1322.760253 |
| N                                            | -2.50504600 | 0.78867400  | -0.13648100  |
| C                                            | -1.99389300 | 1.73093200  | -1.11283500  |
| C                                            | -1.00292800 | 2.72226100  | -0.50729900  |
| C                                            | 0.45428400  | 2.24247300  | -0.38992500  |
| H                                            | -1.37634700 | 3.04845100  | 0.47827100   |
| H                                            | -0.99595400 | 3.62215400  | -1.14027500  |
| H                                            | 1.03703100  | 3.10006500  | -0.00647200  |
| H                                            | 0.83627300  | 2.02436800  | -1.40043900  |
| H                                            | -2.80425100 | 1.16129300  | 0.75986800   |
| C                                            | -2.76983600 | -0.51128300 | -0.40989300  |
| C                                            | -3.40646800 | -1.28716900 | 0.72952400   |
| H                                            | -3.45092600 | -2.33611600 | 0.41072600   |
| H                                            | -2.74810700 | -1.23256100 | 1.61101900   |
| C                                            | -4.79981200 | -0.76217900 | 1.09444700   |
| H                                            | -5.24868000 | -1.45124300 | 1.83003800   |
| H                                            | -4.70742100 | 0.21127400  | 1.60464500   |
| C                                            | -5.75456000 | -0.60988700 | -0.09506200  |
| H                                            | -5.34669900 | 0.17977200  | -0.75296600  |
| C                                            | -7.12735400 | -0.15203900 | 0.38975100   |
| H                                            | -7.80890800 | 0.03352400  | -0.45392600  |
| H                                            | -7.58720400 | -0.92119200 | 1.03159300   |
| H                                            | -7.05636300 | 0.77636900  | 0.97700200   |
| C                                            | -5.85976700 | -1.89522000 | -0.91323600  |
| H                                            | -4.89877400 | -2.15320700 | -1.38122600  |
| H                                            | -6.17257900 | -2.73921900 | -0.27576800  |
| H                                            | -6.60527900 | -1.78778200 | -1.71593100  |
| O                                            | -2.51617500 | -1.02332600 | -1.49227200  |

|   |             |             |             |
|---|-------------|-------------|-------------|
| H | -1.52736900 | 1.14676200  | -1.91901300 |
| H | -2.83340600 | 2.28745000  | -1.56284000 |
| C | 0.69724000  | 1.05020000  | 0.49963200  |
| C | 0.18515200  | 1.12767600  | 1.90644500  |
| H | 0.28491700  | 2.14277000  | 2.32157900  |
| H | -0.88430200 | 0.85591500  | 1.94295900  |
| H | 0.72760700  | 0.42345400  | 2.55465800  |
| C | 0.71596200  | -0.29971400 | -0.14661700 |
| H | 1.45596900  | -0.33528500 | -0.96341600 |
| H | 0.95208200  | -1.09123900 | 0.58015200  |
| H | -0.25996300 | -0.54012600 | -0.60386900 |
| C | 2.83294400  | 1.29223800  | 0.96644600  |
| N | 3.16671100  | 0.18474800  | 1.59774500  |
| C | 3.90456000  | -0.64415500 | 0.79496000  |
| C | 4.27089800  | -0.10768100 | -0.46732800 |
| S | 3.63245700  | 1.50687600  | -0.61352200 |
| C | 4.31892000  | -1.94788500 | 1.12839100  |
| C | 5.07145300  | -2.67432100 | 0.21683000  |
| C | 5.42342900  | -2.12812600 | -1.03042600 |
| C | 5.02517900  | -0.84196400 | -1.38470900 |
| H | 2.54038000  | 2.19942800  | 1.50281400  |
| H | 4.03794500  | -2.36334300 | 2.09741600  |
| H | 5.39370900  | -3.68594600 | 0.46936300  |
| H | 6.01594800  | -2.71828300 | -1.73125200 |
| H | 5.29666900  | -0.41981500 | -2.35361500 |

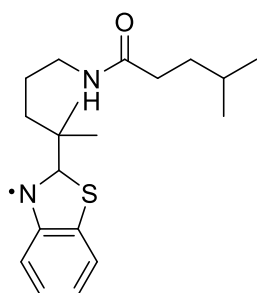

**C-1**

|                                              |             |             |                             |
|----------------------------------------------|-------------|-------------|-----------------------------|
| Zero-point correction=                       |             |             | 0.453177 (Hartree/Particle) |
| Thermal correction to Energy=                |             |             | 0.477296                    |
| Thermal correction to Enthalpy=              |             |             | 0.478240                    |
| Thermal correction to Gibbs Free Energy=     |             |             | 0.397637                    |
| Sum of electronic and zero-point Energies=   |             |             | -1322.733699                |
| Sum of electronic and thermal Energies=      |             |             | -1322.709580                |
| Sum of electronic and thermal Enthalpies=    |             |             | -1322.708636                |
| Sum of electronic and thermal Free Energies= |             |             | -1322.789239                |
| N                                            | -2.61425900 | 0.69807900  | 0.07161200                  |
| C                                            | -2.03633400 | 1.74021400  | -0.75535200                 |
| C                                            | -1.00723400 | 2.59611900  | -0.01153300                 |
| C                                            | 0.46533900  | 2.17602700  | -0.08507400                 |
| H                                            | -1.32702900 | 2.71001700  | 1.03765400                  |
| H                                            | -1.05619300 | 3.60685100  | -0.44311900                 |
| H                                            | 1.04571600  | 2.99723800  | 0.37182300                  |
| H                                            | 0.76102000  | 2.14418900  | -1.14780700                 |
| H                                            | -2.90381700 | 0.95213500  | 1.01133200                  |
| C                                            | -2.95621800 | -0.52808300 | -0.39238800                 |
| C                                            | -3.67027300 | -1.41303000 | 0.61363300                  |
| H                                            | -3.75341000 | -2.40790600 | 0.15851800                  |
| H                                            | -3.04740100 | -1.50710300 | 1.51694800                  |
| C                                            | -5.05002500 | -0.86433900 | 0.99539300                  |
| H                                            | -5.56028900 | -1.61312100 | 1.62506000                  |
| H                                            | -4.93021100 | 0.03387600  | 1.62411300                  |

|   |             |             |             |
|---|-------------|-------------|-------------|
| C | -5.94954300 | -0.51790300 | -0.19634100 |
| H | -5.47277000 | 0.31540000  | -0.74538900 |
| C | -7.31169900 | -0.03694600 | 0.29662800  |
| H | -7.94770400 | 0.28966100  | -0.53982100 |
| H | -7.84032600 | -0.84821600 | 0.82343900  |
| H | -7.21062200 | 0.80691700  | 0.99622000  |
| C | -6.09821300 | -1.69230000 | -1.16141300 |
| H | -5.13777100 | -1.95091700 | -1.63010800 |
| H | -6.47714600 | -2.58398100 | -0.63429900 |
| H | -6.80894500 | -1.45038000 | -1.96631800 |
| O | -2.71402600 | -0.89235400 | -1.53498000 |
| H | -1.59077900 | 1.25273300  | -1.63382600 |
| H | -2.84222300 | 2.39419200  | -1.12880300 |
| C | 0.91304700  | 0.85945000  | 0.58597400  |
| C | 0.27113700  | 0.69780400  | 1.96736400  |
| H | 0.41344000  | 1.60338100  | 2.57834000  |
| H | -0.80708500 | 0.51301400  | 1.86808900  |
| H | 0.71919100  | -0.15177600 | 2.50078800  |
| C | 0.62170800  | -0.36038100 | -0.28953300 |
| H | 1.18818600  | -0.30824500 | -1.23289500 |
| H | 0.90743500  | -1.28668200 | 0.23192800  |
| H | -0.44293100 | -0.43229600 | -0.54465100 |
| C | 2.44883700  | 0.95688600  | 0.82482700  |
| N | 3.01067200  | -0.23309500 | 1.35936800  |
| C | 4.03748300  | -0.69680400 | 0.66480300  |
| C | 4.42788100  | 0.04518700  | -0.50888300 |
| S | 3.40085800  | 1.42100900  | -0.73060100 |
| C | 4.77125700  | -1.87443000 | 1.00128400  |
| C | 5.82567600  | -2.26912100 | 0.20684300  |
| C | 6.19029700  | -1.52432900 | -0.93765600 |

|   |            |             |             |
|---|------------|-------------|-------------|
| C | 5.49732700 | -0.37004700 | -1.29973600 |
| H | 2.61969900 | 1.79231100  | 1.52965300  |
| H | 4.47650400 | -2.43655300 | 1.88849600  |
| H | 6.39007900 | -3.16766300 | 0.46101900  |
| H | 7.02910800 | -1.85828800 | -1.55020200 |
| H | 5.78715800 | 0.19516300  | -2.18663800 |

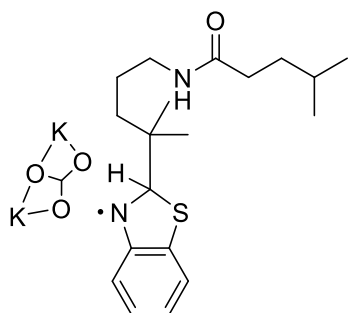

**Complex 2-1**

|                                              |             |             |                             |
|----------------------------------------------|-------------|-------------|-----------------------------|
| Zero-point correction=                       |             |             | 0.471440 (Hartree/Particle) |
| Thermal correction to Energy=                |             |             | 0.503983                    |
| Thermal correction to Enthalpy=              |             |             | 0.504927                    |
| Thermal correction to Gibbs Free Energy=     |             |             | 0.403281                    |
| Sum of electronic and zero-point Energies=   |             |             | -2786.083776                |
| Sum of electronic and thermal Energies=      |             |             | -2786.051233                |
| Sum of electronic and thermal Enthalpies=    |             |             | -2786.050289                |
| Sum of electronic and thermal Free Energies= |             |             | -2786.151935                |
| N                                            | -4.03080200 | 0.55887700  | 0.09391400                  |
| C                                            | -3.33275300 | 1.51283300  | -0.74722200                 |
| C                                            | -2.09343100 | 2.11195300  | -0.07552700                 |
| C                                            | -0.74542000 | 1.42097500  | -0.30750100                 |
| H                                            | -2.28975400 | 2.22361800  | 1.00385900                  |
| H                                            | -1.98105600 | 3.13703400  | -0.45919900                 |
| H                                            | 0.03089500  | 2.07114600  | 0.13481200                  |
| H                                            | -0.55440200 | 1.40214900  | -1.39563300                 |
| H                                            | -4.17381100 | 0.80917400  | 1.06775500                  |
| C                                            | -4.64614800 | -0.55161100 | -0.37844600                 |

|   |             |             |             |
|---|-------------|-------------|-------------|
| C | -5.42346900 | -1.34192300 | 0.65917700  |
| H | -5.72832200 | -2.28015300 | 0.17887900  |
| H | -4.75466700 | -1.59464300 | 1.49681100  |
| C | -6.64042100 | -0.57326900 | 1.18767700  |
| H | -7.22788700 | -1.25124900 | 1.83018300  |
| H | -6.30380900 | 0.25039300  | 1.83945200  |
| C | -7.55509000 | -0.00077900 | 0.09920600  |
| H | -6.97910400 | 0.76393100  | -0.45440500 |
| C | -8.75840200 | 0.68955900  | 0.73553200  |
| H | -9.39032600 | 1.17345300  | -0.02426300 |
| H | -9.38213100 | -0.04157900 | 1.27547000  |
| H | -8.44433600 | 1.45973700  | 1.45656800  |
| C | -7.99824100 | -1.06929900 | -0.89836700 |
| H | -7.14330100 | -1.47325600 | -1.45935200 |
| H | -8.49856100 | -1.90403300 | -0.37921200 |
| H | -8.71094500 | -0.65283700 | -1.62660500 |
| O | -4.58583800 | -0.88996400 | -1.55284800 |
| H | -3.07063700 | 0.99555900  | -1.68098700 |
| H | -4.02372000 | 2.32890300  | -1.01801000 |
| C | -0.51165900 | -0.00010000 | 0.25207000  |
| C | -1.04096600 | -0.12204300 | 1.68489200  |
| H | -0.66402200 | 0.69792500  | 2.31664300  |
| H | -2.13903200 | -0.09057600 | 1.69213700  |
| H | -0.71971400 | -1.07334000 | 2.13152200  |
| C | -1.11517900 | -1.08792900 | -0.63762300 |
| H | -0.66838900 | -1.06022000 | -1.64391200 |
| H | -0.92208400 | -2.08320900 | -0.20770900 |
| H | -2.20053100 | -0.97290100 | -0.75065800 |
| C | 1.01807700  | -0.19391900 | 0.33787100  |
| N | 1.44489900  | -1.46385000 | 0.78623600  |

|   |            |             |             |
|---|------------|-------------|-------------|
| C | 2.50967700 | -1.91926000 | 0.13928600  |
| C | 2.95207900 | -1.16555700 | -1.00805200 |
| S | 1.89645400 | 0.17343400  | -1.29281400 |
| C | 3.24622000 | -3.08109100 | 0.51471900  |
| C | 4.36135200 | -3.45048900 | -0.21473500 |
| C | 4.77657400 | -2.69640300 | -1.33582300 |
| C | 4.07557300 | -1.55660200 | -1.73730600 |
| H | 1.44802200 | 0.57018900  | 1.02379300  |
| H | 2.91719000 | -3.64896900 | 1.38610500  |
| H | 4.93228500 | -4.33321800 | 0.07735500  |
| H | 5.65903500 | -3.00762800 | -1.89678400 |
| H | 4.40525500 | -0.98153400 | -2.60397300 |
| C | 3.53766600 | 1.63997500  | 1.22073100  |
| O | 3.44867300 | 0.67838800  | 2.05921400  |
| O | 2.59135000 | 2.49366000  | 1.08376600  |
| O | 4.59663000 | 1.72769100  | 0.45653200  |
| K | 5.38323700 | -0.58767200 | 1.09596600  |
| K | 3.36587700 | 3.14860300  | -1.20666900 |

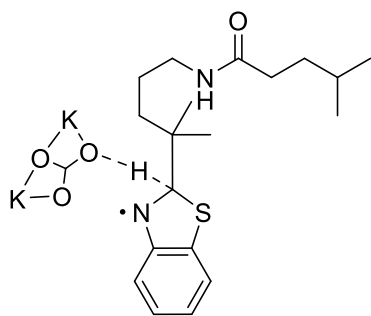

**TS8**

|                                            |                             |
|--------------------------------------------|-----------------------------|
| Zero-point correction=                     | 0.466909 (Hartree/Particle) |
| Thermal correction to Energy=              | 0.499050                    |
| Thermal correction to Enthalpy=            | 0.499994                    |
| Thermal correction to Gibbs Free Energy=   | 0.399789                    |
| Sum of electronic and zero-point Energies= | -2786.084017                |
| Sum of electronic and thermal Energies=    | -2786.051875                |

|                                              |             |             |              |
|----------------------------------------------|-------------|-------------|--------------|
| Sum of electronic and thermal Enthalpies=    |             |             | -2786.050931 |
| Sum of electronic and thermal Free Energies= |             |             | -2786.151136 |
| N                                            | -3.97666600 | 0.46212800  | 0.03113500   |
| C                                            | -3.25553900 | 1.48709300  | -0.69963800  |
| C                                            | -1.99677800 | 1.96825200  | 0.02768300   |
| C                                            | -0.66866900 | 1.27071600  | -0.28634100  |
| H                                            | -2.18782000 | 1.96365700  | 1.11423500   |
| H                                            | -1.85690000 | 3.02730800  | -0.23698100  |
| H                                            | 0.12925900  | 1.85084000  | 0.20968100   |
| H                                            | -0.48580100 | 1.35974500  | -1.37337600  |
| H                                            | -4.08268400 | 0.58647500  | 1.03327800   |
| C                                            | -4.65004800 | -0.54985900 | -0.56595800  |
| C                                            | -5.41779100 | -1.45621200 | 0.38060200   |
| H                                            | -5.82473000 | -2.27288000 | -0.22894600  |
| H                                            | -4.71148800 | -1.89732300 | 1.10168700   |
| C                                            | -6.53286000 | -0.72381400 | 1.13520600   |
| H                                            | -7.12381600 | -1.47181900 | 1.69094900   |
| H                                            | -6.09262300 | -0.05763400 | 1.89608500   |
| C                                            | -7.47397400 | 0.09480200  | 0.24442800   |
| H                                            | -6.88372800 | 0.91901400  | -0.19727000  |
| C                                            | -8.58668000 | 0.71432100  | 1.08536600   |
| H                                            | -9.23033000 | 1.36842400  | 0.47811600   |
| H                                            | -9.22390100 | -0.07134400 | 1.52334300   |
| H                                            | -8.17814400 | 1.31423800  | 1.91295600   |
| C                                            | -8.04787400 | -0.73809200 | -0.90034100  |
| H                                            | -7.25901000 | -1.06614500 | -1.59265800  |
| H                                            | -8.56194100 | -1.63322200 | -0.51178600  |
| H                                            | -8.78068200 | -0.15551200 | -1.47922200  |
| O                                            | -4.63881600 | -0.72422700 | -1.77698200  |
| H                                            | -3.01025000 | 1.07324500  | -1.68810500  |



|   |             |             |             |
|---|-------------|-------------|-------------|
| H | -3.92436500 | 2.34748600  | -0.87201700 |
| C | -0.47221700 | -0.20788500 | 0.11595700  |
| C | -1.00660900 | -0.47104500 | 1.52834000  |
| H | -0.60077000 | 0.26009100  | 2.24539600  |
| H | -2.10328200 | -0.40645600 | 1.54615200  |
| H | -0.71537900 | -1.47607400 | 1.86510100  |
| C | -1.11705300 | -1.17185000 | -0.88625000 |
| H | -0.66795700 | -1.04342800 | -1.88404800 |
| H | -0.94684500 | -2.21341900 | -0.57246700 |
| H | -2.19959400 | -1.01385300 | -0.98002200 |
| C | 1.03972300  | -0.47702200 | 0.16495400  |
| N | 1.46691100  | -1.74894900 | 0.48077000  |
| C | 2.67168200  | -2.03154600 | -0.03926400 |
| C | 3.17563300  | -1.11806700 | -1.02622900 |
| S | 1.99730500  | 0.12217700  | -1.34322600 |
| C | 3.49442000  | -3.12251400 | 0.34631500  |
| C | 4.75976000  | -3.26364700 | -0.20911300 |
| C | 5.24255700  | -2.34484200 | -1.16017600 |
| C | 4.44703000  | -1.27245300 | -1.57802600 |
| H | 1.61730100  | 0.22355000  | 1.04839300  |
| H | 3.12249200  | -3.82299400 | 1.09589800  |
| H | 5.39469000  | -4.09446300 | 0.10404100  |
| H | 6.24213600  | -2.46989600 | -1.57855500 |
| H | 4.82278800  | -0.56195400 | -2.31736400 |
| C | 3.04881600  | 1.82923200  | 1.21078400  |
| O | 2.61899300  | 0.76569900  | 1.85708400  |
| O | 2.23841900  | 2.72906300  | 0.86079700  |
| O | 4.29868700  | 1.88056800  | 0.90894200  |
| K | 4.85685300  | -0.50522100 | 1.59090000  |
| K | 3.61027000  | 3.07285200  | -1.25262300 |

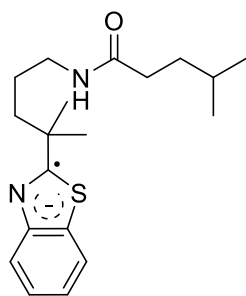

**D-1**

|                                              |             |             |                             |
|----------------------------------------------|-------------|-------------|-----------------------------|
| Zero-point correction=                       |             |             | 0.439800 (Hartree/Particle) |
| Thermal correction to Energy=                |             |             | 0.464063                    |
| Thermal correction to Enthalpy=              |             |             | 0.465007                    |
| Thermal correction to Gibbs Free Energy=     |             |             | 0.383710                    |
| Sum of electronic and zero-point Energies=   |             |             | -1322.248066                |
| Sum of electronic and thermal Energies=      |             |             | -1322.223804                |
| Sum of electronic and thermal Enthalpies=    |             |             | -1322.222860                |
| Sum of electronic and thermal Free Energies= |             |             | -1322.304157                |
| N                                            | 2.70771200  | 0.53370700  | -0.19474400                 |
| C                                            | 2.09682000  | 1.77535100  | 0.24061500                  |
| C                                            | 1.02472800  | 2.28098000  | -0.72927900                 |
| C                                            | -0.43345200 | 1.89521200  | -0.45605700                 |
| H                                            | 1.31167700  | 1.99984900  | -1.75687000                 |
| H                                            | 1.06159400  | 3.38052300  | -0.70862800                 |
| H                                            | -1.05119000 | 2.46460000  | -1.17152100                 |
| H                                            | -0.70705400 | 2.26924200  | 0.54701000                  |
| H                                            | 2.88773700  | 0.41974200  | -1.18737600                 |
| C                                            | 3.19583700  | -0.39546300 | 0.66068200                  |
| C                                            | 3.89935500  | -1.56859800 | 0.00042400                  |
| H                                            | 4.13832900  | -2.28226400 | 0.79887000                  |
| H                                            | 3.20022900  | -2.06226300 | -0.69277800                 |
| C                                            | 5.16374900  | -1.14807400 | -0.75791300                 |
| H                                            | 5.69120600  | -2.06027900 | -1.08548300                 |
| H                                            | 4.88405200  | -0.61115600 | -1.67991000                 |

|   |             |             |             |
|---|-------------|-------------|-------------|
| C | 6.13240800  | -0.27558400 | 0.04840600  |
| H | 5.62755200  | 0.68721100  | 0.25129200  |
| C | 7.38370900  | 0.01679300  | -0.77495500 |
| H | 8.05695200  | 0.70882900  | -0.24711300 |
| H | 7.94353200  | -0.91237300 | -0.97111200 |
| H | 7.12950500  | 0.46647600  | -1.74699000 |
| C | 6.49368900  | -0.90860200 | 1.39085500  |
| H | 5.61494000  | -0.98695000 | 2.04722300  |
| H | 6.90975800  | -1.91985300 | 1.24645500  |
| H | 7.25153500  | -0.30617600 | 1.91473300  |
| O | 3.08378100  | -0.29458400 | 1.87477000  |
| H | 1.67968400  | 1.60467300  | 1.24343300  |
| H | 2.87949500  | 2.54542900  | 0.35095000  |
| C | -0.87347100 | 0.41843100  | -0.56190900 |
| C | -0.29388600 | -0.23336800 | -1.82205600 |
| H | -0.51511000 | 0.37382500  | -2.71484100 |
| H | 0.79650900  | -0.35184400 | -1.74096800 |
| H | -0.74210700 | -1.22570600 | -1.97032000 |
| C | -0.44750100 | -0.38697300 | 0.67952500  |
| H | -0.88960300 | 0.05479800  | 1.58718300  |
| H | -0.82452600 | -1.41862000 | 0.59309900  |
| H | 0.64229600  | -0.43054700 | 0.81513500  |
| C | -2.39294500 | 0.37222900  | -0.67054400 |
| N | -3.03755200 | -0.79467700 | -0.91599500 |
| C | -4.27773200 | -0.84124600 | -0.41688900 |
| C | -4.68486000 | 0.27906200  | 0.39579500  |
| S | -3.35562200 | 1.42267700  | 0.48446000  |
| C | -5.24055300 | -1.87555600 | -0.61504800 |
| C | -6.50038700 | -1.78222400 | -0.02815700 |
| C | -6.86899200 | -0.68681500 | 0.76328100  |

|   |             |             |             |
|---|-------------|-------------|-------------|
| C | -5.94030700 | 0.35664000  | 0.97471800  |
| H | -4.97101600 | -2.73571800 | -1.23188700 |
| H | -7.22111000 | -2.58755500 | -0.19479200 |
| H | -7.86228800 | -0.63432600 | 1.21135500  |
| H | -6.21123700 | 1.21789100  | 1.59054200  |

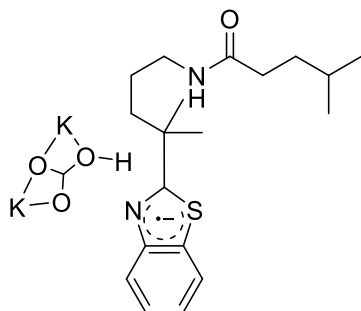

**Complex 3-1**

|                                              |             |             |                             |
|----------------------------------------------|-------------|-------------|-----------------------------|
| Zero-point correction=                       |             |             | 0.470508 (Hartree/Particle) |
| Thermal correction to Energy=                |             |             | 0.503705                    |
| Thermal correction to Enthalpy=              |             |             | 0.504649                    |
| Thermal correction to Gibbs Free Energy=     |             |             | 0.398852                    |
| Sum of electronic and zero-point Energies=   |             |             | -2786.097179                |
| Sum of electronic and thermal Energies=      |             |             | -2786.063982                |
| Sum of electronic and thermal Enthalpies=    |             |             | -2786.063038                |
| Sum of electronic and thermal Free Energies= |             |             | -2786.168836                |
| N                                            | -4.00662900 | 0.42135600  | 0.06758600                  |
| C                                            | -3.29887300 | 1.33570400  | -0.80875200                 |
| C                                            | -2.03699300 | 1.91769800  | -0.16306100                 |
| C                                            | -0.69890100 | 1.21812400  | -0.42584500                 |
| H                                            | -2.20926300 | 2.02230100  | 0.92141800                  |
| H                                            | -1.92375400 | 2.94559000  | -0.53954400                 |
| H                                            | 0.08629000  | 1.84315400  | 0.03207900                  |
| H                                            | -0.51825400 | 1.22352700  | -1.51704100                 |
| H                                            | -4.09369200 | 0.68359900  | 1.04449300                  |
| C                                            | -4.70022000 | -0.65600300 | -0.37155200                 |
| C                                            | -5.48427500 | -1.38937000 | 0.70246100                  |

|   |             |             |             |
|---|-------------|-------------|-------------|
| H | -5.84534100 | -2.32259500 | 0.25175400  |
| H | -4.80863200 | -1.65408800 | 1.53064100  |
| C | -6.65001100 | -0.54927100 | 1.23931000  |
| H | -7.25280000 | -1.18018700 | 1.91428800  |
| H | -6.25681000 | 0.27422600  | 1.85891300  |
| C | -7.56405100 | 0.03687000  | 0.15793600  |
| H | -6.96317500 | 0.74598800  | -0.44159400 |
| C | -8.70616200 | 0.81835700  | 0.80201900  |
| H | -9.33912000 | 1.30122700  | 0.04287600  |
| H | -9.34674000 | 0.14674300  | 1.39691600  |
| H | -8.32638700 | 1.60167900  | 1.47558600  |
| C | -8.09633500 | -1.04001200 | -0.78532300 |
| H | -7.28217500 | -1.51074900 | -1.35456800 |
| H | -8.62596200 | -1.82596900 | -0.22032800 |
| H | -8.80719200 | -0.61060400 | -1.50826800 |
| O | -4.70670100 | -1.00351300 | -1.54443100 |
| H | -3.06170800 | 0.79066500  | -1.73343200 |
| H | -3.97422700 | 2.16128400  | -1.09177800 |
| C | -0.46682200 | -0.21798100 | 0.09681200  |
| C | -0.94422700 | -0.35290300 | 1.54707400  |
| H | -0.51551900 | 0.44492700  | 2.17510100  |
| H | -2.04063400 | -0.29273000 | 1.60443500  |
| H | -0.62749100 | -1.32008300 | 1.96224700  |
| C | -1.16357300 | -1.26975900 | -0.78561200 |
| H | -0.78483100 | -1.20864000 | -1.81890000 |
| H | -0.93732300 | -2.27839100 | -0.40590900 |
| H | -2.25559500 | -1.15274900 | -0.81536800 |
| C | 1.02679500  | -0.49138300 | 0.07516100  |
| N | 1.57893200  | -1.58644100 | 0.63195300  |
| C | 2.76985600  | -1.91302300 | 0.12454600  |

|   |            |             |             |
|---|------------|-------------|-------------|
| C | 3.21964800 | -1.13812600 | -1.01073800 |
| S | 1.97628400 | 0.04115500  | -1.40231800 |
| C | 3.66336500 | -2.92086500 | 0.60861300  |
| C | 4.87801600 | -3.14608600 | -0.03551200 |
| C | 5.28291700 | -2.39078900 | -1.14923800 |
| C | 4.42983300 | -1.37142700 | -1.64100100 |
| H | 2.16712900 | 0.36476100  | 1.97296300  |
| H | 3.37111800 | -3.51443300 | 1.47686300  |
| H | 5.53938000 | -3.92783400 | 0.34659800  |
| H | 6.23695900 | -2.58878900 | -1.63835900 |
| H | 4.72834600 | -0.77452800 | -2.50564600 |
| C | 3.17575100 | 1.82167800  | 1.26205100  |
| O | 3.09480500 | 0.66101200  | 1.99797200  |
| O | 2.16209600 | 2.52345700  | 1.16142000  |
| O | 4.30449800 | 2.02652100  | 0.75102000  |
| K | 5.37111500 | -0.32795500 | 1.09419600  |
| K | 2.96513300 | 3.15118600  | -1.22261800 |

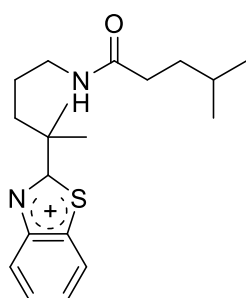

**E-1**

|                                            |                             |
|--------------------------------------------|-----------------------------|
| Zero-point correction=                     | 0.454417 (Hartree/Particle) |
| Thermal correction to Energy=              | 0.478518                    |
| Thermal correction to Enthalpy=            | 0.479462                    |
| Thermal correction to Gibbs Free Energy=   | 0.399572                    |
| Sum of electronic and zero-point Energies= | -1322.547679                |
| Sum of electronic and thermal Energies=    | -1322.523577                |
| Sum of electronic and thermal Enthalpies=  | -1322.522633                |

|                                              |             |             |              |
|----------------------------------------------|-------------|-------------|--------------|
| Sum of electronic and thermal Free Energies= |             |             | -1322.602523 |
| N                                            | -2.60872200 | 0.68535700  | 0.10272100   |
| C                                            | -2.03092700 | 1.72045300  | -0.73300400  |
| C                                            | -0.98249000 | 2.56698800  | -0.00712400  |
| C                                            | 0.48212000  | 2.12421200  | -0.09302500  |
| H                                            | -1.28664200 | 2.69879400  | 1.04400800   |
| H                                            | -1.01475300 | 3.57280000  | -0.45071000  |
| H                                            | 1.07805600  | 2.94364900  | 0.34557600   |
| H                                            | 0.75865500  | 2.06751600  | -1.16035300  |
| H                                            | -2.93095500 | 0.95824100  | 1.02661000   |
| C                                            | -2.95506900 | -0.54395500 | -0.35282100  |
| C                                            | -3.70696700 | -1.40401400 | 0.64675600   |
| H                                            | -3.79562400 | -2.40344000 | 0.20278100   |
| H                                            | -3.10716900 | -1.49577600 | 1.56578800   |
| C                                            | -5.08618600 | -0.82735700 | 0.98804900   |
| H                                            | -5.62490300 | -1.56032100 | 1.61244900   |
| H                                            | -4.96671500 | 0.07534600  | 1.61040600   |
| C                                            | -5.94906000 | -0.47837000 | -0.22981400  |
| H                                            | -5.44373600 | 0.33988800  | -0.77604400  |
| C                                            | -7.31377100 | 0.03365700  | 0.22270500   |
| H                                            | -7.92197100 | 0.36128300  | -0.63375900  |
| H                                            | -7.87057000 | -0.76084000 | 0.74598500   |
| H                                            | -7.21444900 | 0.88466600  | 0.91383600   |
| C                                            | -6.09598100 | -1.66115700 | -1.18479700  |
| H                                            | -5.12897100 | -1.94720900 | -1.62289800  |
| H                                            | -6.50964100 | -2.53740400 | -0.65794800  |
| H                                            | -6.77843700 | -1.41424100 | -2.01232900  |
| O                                            | -2.68665100 | -0.92787800 | -1.48291700  |
| H                                            | -1.60435100 | 1.22824900  | -1.61801800  |
| H                                            | -2.83445300 | 2.38417900  | -1.09323200  |

|   |             |             |             |
|---|-------------|-------------|-------------|
| C | 0.90393200  | 0.80623600  | 0.59293200  |
| C | 0.27158700  | 0.65927100  | 1.97825000  |
| H | 0.41285300  | 1.57177300  | 2.57700300  |
| H | -0.80501400 | 0.47273900  | 1.87065700  |
| H | 0.71371800  | -0.18791700 | 2.52020300  |
| C | 0.61666300  | -0.41894500 | -0.27607800 |
| H | 1.20130100  | -0.39594600 | -1.20981000 |
| H | 0.85935000  | -1.34660400 | 0.26380600  |
| H | -0.44281900 | -0.46101700 | -0.55712000 |
| C | 2.45096400  | 0.89748700  | 0.83317900  |
| N | 3.01968000  | -0.28546200 | 1.32440900  |
| C | 4.02961200  | -0.71757900 | 0.65203700  |
| C | 4.41582800  | 0.10338500  | -0.51405100 |
| S | 3.39795100  | 1.42323400  | -0.67638200 |
| C | 4.78370200  | -1.91447600 | 0.96243700  |
| C | 5.82812500  | -2.23917900 | 0.16191400  |
| C | 6.18246800  | -1.41634700 | -0.96833400 |
| C | 5.51009600  | -0.26733900 | -1.31493100 |
| H | 2.62959700  | 1.70453100  | 1.57291100  |
| H | 4.48576900  | -2.50831500 | 1.82668900  |
| H | 6.42254600  | -3.13119200 | 0.35938500  |
| H | 7.03265100  | -1.72767700 | -1.57871600 |
| H | 5.80809300  | 0.32840200  | -2.17729900 |

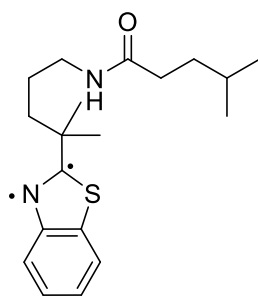

**F-1**

Zero-point correction=

0.439739 (Hartree/Particle)



|                                              |             |             |              |
|----------------------------------------------|-------------|-------------|--------------|
| Thermal correction to Energy=                |             |             | 0.464045     |
| Thermal correction to Enthalpy=              |             |             | 0.464989     |
| Thermal correction to Gibbs Free Energy=     |             |             | 0.383484     |
| Sum of electronic and zero-point Energies=   |             |             | -1322.068217 |
| Sum of electronic and thermal Energies=      |             |             | -1322.043911 |
| Sum of electronic and thermal Enthalpies=    |             |             | -1322.042967 |
| Sum of electronic and thermal Free Energies= |             |             | -1322.124472 |
| N                                            | 2.55559400  | 0.67092000  | -0.13255400  |
| C                                            | 2.14157900  | 1.92625400  | 0.46567600   |
| C                                            | 0.81288500  | 2.44815000  | -0.08716600  |
| C                                            | -0.48841200 | 2.04509100  | 0.61645300   |
| H                                            | 0.75629900  | 2.21047200  | -1.16273000  |
| H                                            | 0.85453000  | 3.54658200  | -0.03512700  |
| H                                            | -1.28814500 | 2.64313700  | 0.15523000   |
| H                                            | -0.43935700 | 2.35819100  | 1.67350400   |
| H                                            | 2.48064400  | 0.58625300  | -1.14183200  |
| C                                            | 3.19534500  | -0.31214900 | 0.54577600   |
| C                                            | 3.66029400  | -1.47765400 | -0.30881000  |
| H                                            | 4.02448700  | -2.25050400 | 0.37964300   |
| H                                            | 2.79799100  | -1.89177900 | -0.85457000  |
| C                                            | 4.75126200  | -1.06820700 | -1.30526700  |
| H                                            | 5.13178400  | -1.97854000 | -1.79918900  |
| H                                            | 4.30916000  | -0.44837800 | -2.10326800  |
| C                                            | 5.92717900  | -0.30779900 | -0.68245400  |
| H                                            | 5.53789400  | 0.65219300  | -0.29541400  |
| C                                            | 6.97385500  | 0.00753400  | -1.74809000  |
| H                                            | 7.79453300  | 0.61307600  | -1.33510400  |
| H                                            | 7.41088500  | -0.92206100 | -2.14819500  |
| H                                            | 6.53449400  | 0.56168500  | -2.59165400  |
| C                                            | 6.54571900  | -1.06848900 | 0.48877000   |

|   |             |             |             |
|---|-------------|-------------|-------------|
| H | 5.83296600  | -1.17649700 | 1.31902200  |
| H | 6.86755200  | -2.07543900 | 0.17408500  |
| H | 7.43116700  | -0.53909400 | 0.87259000  |
| O | 3.39042000  | -0.26194200 | 1.75265200  |
| H | 2.09119400  | 1.77167800  | 1.55248500  |
| H | 2.92291000  | 2.68448900  | 0.28863200  |
| C | -0.94291800 | 0.56254200  | 0.58302100  |
| C | -0.75643000 | -0.05399400 | -0.81406200 |
| H | -1.19849600 | 0.58504400  | -1.59359300 |
| H | 0.31192400  | -0.18686900 | -1.03513400 |
| H | -1.23972000 | -1.04297100 | -0.85999100 |
| C | -0.19841800 | -0.26220000 | 1.63822300  |
| H | -0.47471900 | 0.06704300  | 2.65284100  |
| H | -0.43715100 | -1.33284000 | 1.54699300  |
| H | 0.88844700  | -0.15618900 | 1.53807000  |
| C | -2.42528400 | 0.56484900  | 0.91066100  |
| N | -3.28724900 | 1.24568900  | 0.00231900  |
| C | -4.25916300 | 0.48448300  | -0.41807400 |
| C | -4.39679200 | -0.82190500 | 0.22186100  |
| S | -3.19941700 | -0.96706400 | 1.50104400  |
| C | -5.21513800 | 0.84401600  | -1.43552800 |
| C | -6.19418100 | -0.05430100 | -1.79018100 |
| C | -6.27994300 | -1.32246100 | -1.17067300 |
| C | -5.37225900 | -1.71067700 | -0.16122000 |
| H | -5.12567900 | 1.82199600  | -1.90968000 |
| H | -6.91711900 | 0.20828100  | -2.56379800 |
| H | -7.07428600 | -2.01009600 | -1.46301400 |
| H | -5.47037500 | -2.68504800 | 0.31941200  |

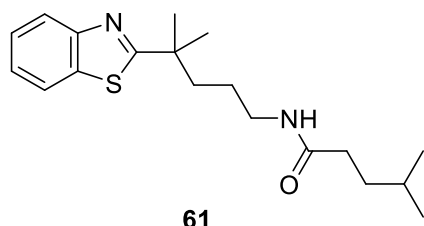

|                                              |             |             |                             |
|----------------------------------------------|-------------|-------------|-----------------------------|
| Zero-point correction=                       |             |             | 0.443900 (Hartree/Particle) |
| Thermal correction to Energy=                |             |             | 0.467608                    |
| Thermal correction to Enthalpy=              |             |             | 0.468552                    |
| Thermal correction to Gibbs Free Energy=     |             |             | 0.388500                    |
| Sum of electronic and zero-point Energies=   |             |             | -1322.191187                |
| Sum of electronic and thermal Energies=      |             |             | -1322.167480                |
| Sum of electronic and thermal Enthalpies=    |             |             | -1322.166535                |
| Sum of electronic and thermal Free Energies= |             |             | -1322.246588                |
| N                                            | -2.70168500 | -0.01758000 | 0.57343000                  |
| C                                            | -2.04847800 | 0.92521500  | 1.46183200                  |
| C                                            | -0.83602300 | 0.32187200  | 2.17678800                  |
| C                                            | 0.54706600  | 0.51997800  | 1.54855600                  |
| H                                            | -1.02473000 | -0.74880900 | 2.36065400                  |
| H                                            | -0.77993000 | 0.78341800  | 3.17373900                  |
| H                                            | 1.27924400  | 0.11361200  | 2.26598600                  |
| H                                            | 0.75401600  | 1.60194100  | 1.48111000                  |
| H                                            | -2.82777000 | -0.96694600 | 0.91165600                  |
| C                                            | -3.32278900 | 0.34141300  | -0.57645000                 |
| C                                            | -4.07255500 | -0.77945500 | -1.27395100                 |
| H                                            | -4.39431700 | -0.38757800 | -2.24705000                 |
| H                                            | -3.38058700 | -1.61563100 | -1.46014600                 |
| C                                            | -5.27040800 | -1.27590300 | -0.45540200                 |
| H                                            | -5.84086700 | -1.99149900 | -1.07178300                 |
| H                                            | -4.91177000 | -1.84407700 | 0.41918300                  |
| C                                            | -6.21452000 | -0.16930500 | 0.02685000                  |
| H                                            | -5.64845900 | 0.47331700  | 0.72657400                  |

|   |             |             |             |
|---|-------------|-------------|-------------|
| C | -7.38699400 | -0.77630200 | 0.79256500  |
| H | -8.04147800 | 0.00466900  | 1.20799700  |
| H | -7.99851000 | -1.40795100 | 0.12751500  |
| H | -7.03927400 | -1.40555200 | 1.62615100  |
| C | -6.70354900 | 0.70716800  | -1.12430200 |
| H | -5.87329800 | 1.25809700  | -1.58944600 |
| H | -7.19097200 | 0.09426600  | -1.90103400 |
| H | -7.43835500 | 1.44564800  | -0.76902400 |
| O | -3.28701200 | 1.48271100  | -1.01499900 |
| H | -1.76737900 | 1.80354500  | 0.86395300  |
| H | -2.77327600 | 1.27407800  | 2.21662800  |
| C | 0.84980500  | -0.11888200 | 0.16618000  |
| C | 0.36947100  | -1.56908500 | 0.10320400  |
| H | 0.75538700  | -2.15374000 | 0.95083600  |
| H | -0.72791200 | -1.59735300 | 0.12218300  |
| H | 0.71412200  | -2.04931100 | -0.82353600 |
| C | 0.24055700  | 0.69414800  | -0.98608700 |
| H | 0.55786600  | 1.74794400  | -0.94634900 |
| H | 0.55477600  | 0.28004700  | -1.95651300 |
| H | -0.85550400 | 0.67744100  | -0.94912800 |
| C | 2.35803600  | -0.10706100 | 0.01244900  |
| N | 3.11501600  | -1.14851500 | 0.00705000  |
| C | 4.45403400  | -0.81764800 | -0.11197900 |
| C | 4.71879800  | 0.56602800  | -0.20014300 |
| S | 3.21487100  | 1.43728900  | -0.13364700 |
| C | 5.51807400  | -1.73090700 | -0.15052800 |
| C | 6.81310400  | -1.24709300 | -0.27387200 |
| C | 7.06301000  | 0.13421100  | -0.36073400 |
| C | 6.02268500  | 1.05557200  | -0.32609600 |
| H | 5.30950300  | -2.79963700 | -0.08271900 |

|   |            |             |             |
|---|------------|-------------|-------------|
| H | 7.64987900 | -1.94668800 | -0.30400600 |
| H | 8.08979200 | 0.49072800  | -0.45736100 |
| H | 6.21870300 | 2.12657800  | -0.39435700 |

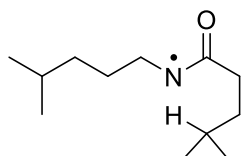

**1y-iso2**

|                                              |             |             |                             |
|----------------------------------------------|-------------|-------------|-----------------------------|
| Zero-point correction=                       |             |             | 0.344276 (Hartree/Particle) |
| Thermal correction to Energy=                |             |             | 0.361687                    |
| Thermal correction to Enthalpy=              |             |             | 0.362632                    |
| Thermal correction to Gibbs Free Energy=     |             |             | 0.297375                    |
| Sum of electronic and zero-point Energies=   |             |             | -600.585395                 |
| Sum of electronic and thermal Energies=      |             |             | -600.567984                 |
| Sum of electronic and thermal Enthalpies=    |             |             | -600.567040                 |
| Sum of electronic and thermal Free Energies= |             |             | -600.632297                 |
| N                                            | 0.03625300  | -0.02765700 | -0.14929800                 |
| C                                            | -0.49143000 | -0.72232500 | -1.28857800                 |
| C                                            | -1.63895300 | -1.66818500 | -0.94154900                 |
| C                                            | -2.98486000 | -0.96924000 | -0.74811900                 |
| C                                            | -3.05266200 | 0.08914800  | 0.35890200                  |
| C                                            | -4.43912600 | 0.72977500  | 0.38057700                  |
| C                                            | -2.70612700 | -0.48765600 | 1.72961900                  |
| H                                            | -1.36025800 | -2.24743600 | -0.04689400                 |
| H                                            | -1.73719500 | -2.39310200 | -1.76362000                 |
| H                                            | -3.75378700 | -1.73570100 | -0.54452200                 |
| H                                            | -3.27104300 | -0.49487600 | -1.70297200                 |
| H                                            | -2.32204600 | 0.88150300  | 0.11776500                  |
| H                                            | -4.49918300 | 1.52781000  | 1.13600700                  |
| H                                            | -5.20995000 | -0.02047400 | 0.62270700                  |
| H                                            | -4.69417200 | 1.16901900  | -0.59601000                 |

|   |             |             |             |
|---|-------------|-------------|-------------|
| H | -2.80694300 | 0.27728700  | 2.51512700  |
| H | -1.67479600 | -0.86609200 | 1.76523000  |
| H | -3.38556000 | -1.31919300 | 1.98236500  |
| C | 0.44978200  | 1.28967400  | -0.31699700 |
| C | 1.70736400  | 1.67869600  | 0.42242700  |
| H | 1.80349400  | 2.76722800  | 0.31859400  |
| H | 1.55717800  | 1.44925600  | 1.48885300  |
| C | 2.98170400  | 0.99681200  | -0.09328400 |
| H | 3.10721800  | 1.23871900  | -1.16164200 |
| H | 3.83482400  | 1.46112700  | 0.42991700  |
| C | 3.08196000  | -0.52275900 | 0.09014300  |
| H | 2.30170000  | -1.00413100 | -0.52400100 |
| C | 2.86865900  | -0.94677600 | 1.54112400  |
| H | 3.03824000  | -2.02763100 | 1.66070400  |
| H | 3.57288700  | -0.42118700 | 2.20767600  |
| H | 1.84620800  | -0.73256900 | 1.88446500  |
| C | 4.43663500  | -1.00687100 | -0.42204700 |
| H | 4.60227800  | -0.70434700 | -1.46731300 |
| H | 5.25386700  | -0.58278100 | 0.18415800  |
| H | 4.51402300  | -2.10319900 | -0.37087700 |
| O | -0.22729300 | 2.07928800  | -0.94810800 |
| H | -0.78056900 | -0.00624500 | -2.07959500 |
| H | 0.35047300  | -1.31543700 | -1.69947800 |

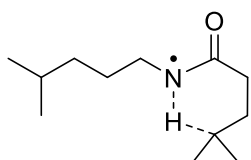

**TS5**

|                                 |                             |
|---------------------------------|-----------------------------|
| Zero-point correction=          | 0.339929 (Hartree/Particle) |
| Thermal correction to Energy=   | 0.356650                    |
| Thermal correction to Enthalpy= | 0.357594                    |

|                                              |             |             |             |
|----------------------------------------------|-------------|-------------|-------------|
| Thermal correction to Gibbs Free Energy=     |             |             | 0.295195    |
| Sum of electronic and zero-point Energies=   |             |             | -600.574216 |
| Sum of electronic and thermal Energies=      |             |             | -600.557494 |
| Sum of electronic and thermal Enthalpies=    |             |             | -600.556550 |
| Sum of electronic and thermal Free Energies= |             |             | -600.618950 |
| N                                            | 0.25571700  | -0.00673500 | -0.36394400 |
| C                                            | -0.36383800 | -0.78542100 | -1.41511000 |
| C                                            | -1.48061300 | -1.69787300 | -0.91308600 |
| C                                            | -2.80872600 | -0.99205300 | -0.63741000 |
| C                                            | -2.79777100 | 0.11961000  | 0.41929500  |
| C                                            | -4.19394000 | 0.72716400  | 0.54313900  |
| C                                            | -2.30890100 | -0.38089000 | 1.77646500  |
| H                                            | -1.12454300 | -2.23045800 | -0.01592500 |
| H                                            | -1.65327800 | -2.46976800 | -1.67936600 |
| H                                            | -3.55256700 | -1.75005600 | -0.33232200 |
| H                                            | -3.17917600 | -0.56666100 | -1.58666400 |
| H                                            | -2.11419400 | 0.91312200  | 0.07207900  |
| H                                            | -4.20587900 | 1.56056900  | 1.26200000  |
| H                                            | -4.91733000 | -0.02762900 | 0.89397100  |
| H                                            | -4.55300600 | 1.11023000  | -0.42455200 |
| H                                            | -2.37109800 | 0.41494800  | 2.53510100  |
| H                                            | -1.26303300 | -0.71668600 | 1.73210400  |
| H                                            | -2.92723100 | -1.22498700 | 2.12653900  |
| C                                            | 0.50535100  | 1.33195400  | -0.52084900 |
| C                                            | 1.69301500  | 1.84990700  | 0.27235900  |
| H                                            | 1.83878300  | 2.90194800  | -0.00081700 |
| H                                            | 1.42997600  | 1.81144200  | 1.34192700  |
| C                                            | 2.94470800  | 1.01060600  | -0.00182300 |
| H                                            | 3.21820400  | 1.11997800  | -1.06340700 |
| H                                            | 3.79413200  | 1.39072900  | 0.59057000  |

|   |             |             |             |
|---|-------------|-------------|-------------|
| C | 2.70596200  | -0.46400200 | 0.30763300  |
| H | 1.54564100  | -0.57233700 | -0.00469900 |
| C | 2.72467700  | -0.79335800 | 1.78774100  |
| H | 2.39549400  | -1.82680000 | 1.97112900  |
| H | 3.75039600  | -0.69222700 | 2.18255800  |
| H | 2.07456500  | -0.11975600 | 2.36582900  |
| C | 3.51649900  | -1.41924200 | -0.54045500 |
| H | 3.36579600  | -1.23322800 | -1.61422100 |
| H | 4.59263400  | -1.28877200 | -0.32886800 |
| H | 3.25970100  | -2.46703200 | -0.32562200 |
| O | -0.21183400 | 2.05806900  | -1.19185600 |
| H | -0.73831400 | -0.09279300 | -2.18936100 |
| H | 0.42044300  | -1.39960200 | -1.89291000 |

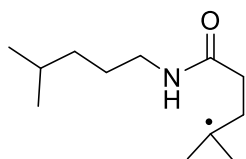

**1y-iso2-HAT**

|                                              |             |             |                             |
|----------------------------------------------|-------------|-------------|-----------------------------|
| Zero-point correction=                       |             |             | 0.344715 (Hartree/Particle) |
| Thermal correction to Energy=                |             |             | 0.362364                    |
| Thermal correction to Enthalpy=              |             |             | 0.363308                    |
| Thermal correction to Gibbs Free Energy=     |             |             | 0.298850                    |
| Sum of electronic and zero-point Energies=   |             |             | -600.609996                 |
| Sum of electronic and thermal Energies=      |             |             | -600.592347                 |
| Sum of electronic and thermal Enthalpies=    |             |             | -600.591403                 |
| Sum of electronic and thermal Free Energies= |             |             | -600.655862                 |
| N                                            | 0.13315500  | 1.26371700  | -0.51124700                 |
| C                                            | -1.04607300 | 1.66144900  | -1.25556800                 |
| C                                            | -1.83289900 | 0.47807400  | -1.82338100                 |
| C                                            | -2.77939500 | -0.21057700 | -0.83873600                 |
| C                                            | -2.16007200 | -0.80081900 | 0.43409800                  |



|   |             |             |             |
|---|-------------|-------------|-------------|
| C | -3.25578000 | -1.42427700 | 1.29700300  |
| C | -1.07352800 | -1.82873900 | 0.12582600  |
| H | -1.12138100 | -0.24671600 | -2.25529600 |
| H | -2.43281500 | 0.84939900  | -2.66869000 |
| H | -3.30885300 | -1.02149100 | -1.37091100 |
| H | -3.55587400 | 0.51548600  | -0.54059400 |
| H | -1.71136000 | 0.02535700  | 1.01109300  |
| H | -2.84904500 | -1.81082200 | 2.24395400  |
| H | -3.73630700 | -2.26520800 | 0.76987000  |
| H | -4.03990700 | -0.69089100 | 1.54030500  |
| H | -0.68151400 | -2.27676200 | 1.05248200  |
| H | -0.22535900 | -1.38214300 | -0.41412200 |
| H | -1.47882100 | -2.64706400 | -0.49356800 |
| C | 0.32983800  | 1.53427700  | 0.79921900  |
| C | 1.60120900  | 0.98515400  | 1.43029500  |
| H | 1.92990400  | 1.75660500  | 2.14067300  |
| H | 1.28872900  | 0.12385100  | 2.04511600  |
| C | 2.74998200  | 0.58690500  | 0.49494800  |
| H | 2.94139200  | 1.40701700  | -0.21578900 |
| H | 3.66228100  | 0.50245600  | 1.11695600  |
| C | 2.54531700  | -0.70400400 | -0.24833300 |
| H | 0.81890300  | 0.69737500  | -0.99914000 |
| C | 2.54395700  | -1.97560000 | 0.53550700  |
| H | 2.02726400  | -2.78685500 | -0.00097200 |
| H | 3.58029200  | -2.32642700 | 0.71735600  |
| H | 2.07214700  | -1.85861800 | 1.52306700  |
| C | 2.89061100  | -0.78145400 | -1.69971800 |
| H | 2.64506500  | 0.14897000  | -2.23665800 |
| H | 3.97600500  | -0.95529500 | -1.84952400 |
| H | 2.37056900  | -1.61700600 | -2.19516700 |

|   |             |            |             |
|---|-------------|------------|-------------|
| O | -0.47180600 | 2.16424700 | 1.47566700  |
| H | -1.67075100 | 2.25417600 | -0.57294400 |
| H | -0.73721200 | 2.32227900 | -2.08105700 |

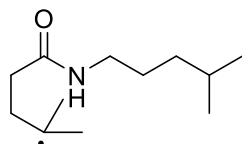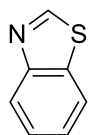

**Complex 1-2**

|                                              |             |             |                             |
|----------------------------------------------|-------------|-------------|-----------------------------|
| Zero-point correction=                       |             |             | 0.449263 (Hartree/Particle) |
| Thermal correction to Energy=                |             |             | 0.475191                    |
| Thermal correction to Enthalpy=              |             |             | 0.476135                    |
| Thermal correction to Gibbs Free Energy=     |             |             | 0.389174                    |
| Sum of electronic and zero-point Energies=   |             |             | -1322.712122                |
| Sum of electronic and thermal Energies=      |             |             | -1322.686195                |
| Sum of electronic and thermal Enthalpies=    |             |             | -1322.685251                |
| Sum of electronic and thermal Free Energies= |             |             | -1322.772212                |
| N                                            | -2.46649100 | 0.52732800  | -1.31129000                 |
| C                                            | -3.35359800 | -0.25504900 | -2.15067800                 |
| C                                            | -3.57205400 | -1.68002200 | -1.63291300                 |
| C                                            | -4.67172600 | -1.83064100 | -0.58009300                 |
| C                                            | -4.54718900 | -0.97702500 | 0.68713200                  |
| C                                            | -5.74697800 | -1.22848600 | 1.59853100                  |
| C                                            | -3.24398100 | -1.23850500 | 1.43914000                  |
| H                                            | -2.61053800 | -2.06723300 | -1.25385800                 |
| H                                            | -3.83390800 | -2.31735800 | -2.49159900                 |
| H                                            | -4.72724600 | -2.89262500 | -0.28005500                 |
| H                                            | -5.63991000 | -1.59813200 | -1.05691600                 |
| H                                            | -4.57133800 | 0.08423100  | 0.38649900                  |
| H                                            | -5.70781100 | -0.59473000 | 2.49772300                  |

|   |             |             |             |
|---|-------------|-------------|-------------|
| H | -5.76905100 | -2.27947700 | 1.93143900  |
| H | -6.69630400 | -1.02153600 | 1.08084200  |
| H | -3.18872600 | -0.62695500 | 2.35376200  |
| H | -2.36228300 | -1.00240300 | 0.82630200  |
| H | -3.17501200 | -2.29729200 | 1.74270300  |
| C | -2.82532800 | 1.66169900  | -0.66994900 |
| C | -1.77267200 | 2.31807800  | 0.21126300  |
| H | -1.83205000 | 3.39259800  | -0.01588600 |
| H | -2.13798000 | 2.21199800  | 1.24663100  |
| C | -0.32051800 | 1.82903100  | 0.10691400  |
| H | -0.01267200 | 1.81762100  | -0.95157600 |
| H | 0.30276800  | 2.60102800  | 0.59719300  |
| H | -1.52841800 | 0.16782100  | -1.17889000 |
| O | -3.94287600 | 2.15249200  | -0.75958700 |
| H | -4.30490300 | 0.29181600  | -2.21004300 |
| H | -2.93112600 | -0.29607800 | -3.16687700 |
| C | -0.05104300 | 0.49306100  | 0.73970600  |
| C | -0.12280300 | 0.35685200  | 2.22541300  |
| H | -0.76043900 | 1.12616300  | 2.68707800  |
| H | -0.50754300 | -0.63270100 | 2.52443500  |
| H | 0.88340700  | 0.44572500  | 2.68204600  |
| C | 0.52063300  | -0.65414800 | -0.02850800 |
| H | 0.61870600  | -0.43672600 | -1.10337900 |
| H | 1.52334500  | -0.93838300 | 0.34725100  |
| H | -0.10003000 | -1.56439300 | 0.08071900  |
| C | 3.00253200  | 1.56317700  | 1.04482600  |
| N | 3.49675900  | 0.54034800  | 1.64930700  |
| C | 4.11491100  | -0.31212400 | 0.74878400  |
| C | 4.06941300  | 0.11224600  | -0.59752100 |
| S | 3.22354200  | 1.62975400  | -0.68788100 |

|   |            |             |             |
|---|------------|-------------|-------------|
| C | 4.74100000 | -1.52561700 | 1.07441000  |
| C | 5.30422000 | -2.28088900 | 0.05719100  |
| C | 5.25243800 | -1.84620800 | -1.28082400 |
| C | 4.63730300 | -0.64954000 | -1.62483100 |
| H | 2.47235800 | 2.37563000  | 1.54925500  |
| H | 4.77027100 | -1.85099400 | 2.11519900  |
| H | 5.79405800 | -3.22649200 | 0.29443000  |
| H | 5.70243500 | -2.45964800 | -2.06298500 |
| H | 4.59705200 | -0.31654300 | -2.66273000 |

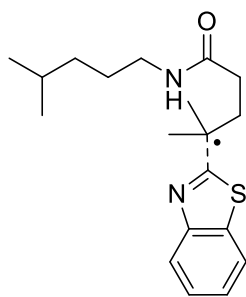

**TS7**

|                                              |             |             |                             |
|----------------------------------------------|-------------|-------------|-----------------------------|
| Zero-point correction=                       |             |             | 0.450163 (Hartree/Particle) |
| Thermal correction to Energy=                |             |             | 0.474614                    |
| Thermal correction to Enthalpy=              |             |             | 0.475558                    |
| Thermal correction to Gibbs Free Energy=     |             |             | 0.394323                    |
| Sum of electronic and zero-point Energies=   |             |             | -1322.699259                |
| Sum of electronic and thermal Energies=      |             |             | -1322.674809                |
| Sum of electronic and thermal Enthalpies=    |             |             | -1322.673865                |
| Sum of electronic and thermal Free Energies= |             |             | -1322.755099                |
| N                                            | -2.23692700 | 0.29635100  | -1.33031900                 |
| C                                            | -3.07417200 | -0.61129300 | -2.09199900                 |
| C                                            | -3.34207300 | -1.93737500 | -1.36957400                 |
| C                                            | -4.55678700 | -1.93894700 | -0.43962500                 |
| C                                            | -4.58303900 | -0.88566500 | 0.67329300                  |
| C                                            | -5.88569000 | -0.99803000 | 1.46314000                  |
| C                                            | -3.38163400 | -0.99522800 | 1.60995500                  |

|   |             |             |             |
|---|-------------|-------------|-------------|
| H | -2.42899400 | -2.22951300 | -0.82287600 |
| H | -3.49767900 | -2.71592900 | -2.13210300 |
| H | -4.64592900 | -2.93853600 | 0.02254700  |
| H | -5.46220700 | -1.80736500 | -1.05755200 |
| H | -4.56316900 | 0.10949900  | 0.19882300  |
| H | -5.95175700 | -0.21777100 | 2.23670700  |
| H | -5.95422000 | -1.97617400 | 1.96766000  |
| H | -6.76392300 | -0.89762600 | 0.80698200  |
| H | -3.45094700 | -0.25654700 | 2.42413700  |
| H | -2.43436900 | -0.82143900 | 1.07952900  |
| H | -3.33315500 | -1.99658000 | 2.07089200  |
| C | -2.63558300 | 1.49678300  | -0.85810900 |
| C | -1.63246300 | 2.27282800  | -0.01774000 |
| H | -1.79690700 | 3.32428700  | -0.28972200 |
| H | -1.97316200 | 2.18303300  | 1.02720400  |
| C | -0.13112800 | 1.94589700  | -0.13507400 |
| H | 0.12137200  | 1.72025400  | -1.18346500 |
| H | 0.39330900  | 2.88417200  | 0.11477600  |
| H | -1.28992500 | -0.00930900 | -1.14288000 |
| O | -3.75330300 | 1.95488300  | -1.05276000 |
| H | -4.01374600 | -0.08219800 | -2.30409100 |
| H | -2.58141000 | -0.81204100 | -3.05562900 |
| C | 0.41229700  | 0.86606000  | 0.77584300  |
| C | 0.10017300  | 1.00656000  | 2.23539900  |
| H | 0.13529600  | 2.05729800  | 2.56225600  |
| H | -0.91407700 | 0.62321900  | 2.44893900  |
| H | 0.80739300  | 0.42080900  | 2.84081500  |
| C | 0.52733500  | -0.54247900 | 0.27783400  |
| H | 0.81997700  | -0.58655000 | -0.78311700 |
| H | 1.26006800  | -1.10782000 | 0.87457100  |

|   |             |             |             |
|---|-------------|-------------|-------------|
| H | -0.43111500 | -1.08266300 | 0.39281700  |
| C | 2.51897200  | 1.44939500  | 0.83909300  |
| N | 3.12725700  | 0.53057900  | 1.56114900  |
| C | 3.85564900  | -0.32176600 | 0.77482300  |
| C | 3.91649100  | 0.01685500  | -0.60244100 |
| S | 3.01303100  | 1.47953600  | -0.87766600 |
| C | 4.52867900  | -1.47367500 | 1.22586400  |
| C | 5.23186700  | -2.24759200 | 0.31468700  |
| C | 5.27950700  | -1.89898500 | -1.04745700 |
| C | 4.62209100  | -0.76632600 | -1.51864200 |
| H | 2.17716500  | 2.39213800  | 1.27579600  |
| H | 4.48187800  | -1.73591100 | 2.28397300  |
| H | 5.75484100  | -3.14201100 | 0.65737200  |
| H | 5.83923100  | -2.52335200 | -1.74555700 |
| H | 4.65882600  | -0.49761900 | -2.57550000 |

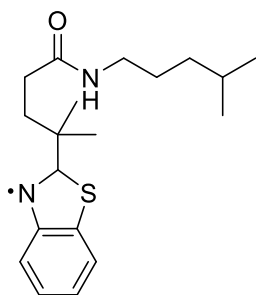

**C-2**

|                                              |                             |             |             |
|----------------------------------------------|-----------------------------|-------------|-------------|
| Zero-point correction=                       | 0.453020 (Hartree/Particle) |             |             |
| Thermal correction to Energy=                | 0.477390                    |             |             |
| Thermal correction to Enthalpy=              | 0.478334                    |             |             |
| Thermal correction to Gibbs Free Energy=     | 0.396291                    |             |             |
| Sum of electronic and zero-point Energies=   | -1322.735528                |             |             |
| Sum of electronic and thermal Energies=      | -1322.711159                |             |             |
| Sum of electronic and thermal Enthalpies=    | -1322.710215                |             |             |
| Sum of electronic and thermal Free Energies= | -1322.792257                |             |             |
| N                                            | -2.73034000                 | -0.79029400 | -0.74234400 |

|   |             |             |             |
|---|-------------|-------------|-------------|
| C | -3.77420300 | -1.68095400 | -1.21051000 |
| C | -4.67050500 | -2.21073100 | -0.08953000 |
| C | -5.76975100 | -1.25575700 | 0.37948300  |
| C | -5.33231300 | 0.11059600  | 0.92214800  |
| C | -6.56328000 | 0.92573500  | 1.31456900  |
| C | -4.37807300 | -0.01459800 | 2.10785800  |
| H | -4.03435600 | -2.52162400 | 0.75674600  |
| H | -5.15342800 | -3.13044300 | -0.45467900 |
| H | -6.36137700 | -1.76312600 | 1.16276800  |
| H | -6.46281400 | -1.08581600 | -0.46284200 |
| H | -4.82010000 | 0.65393700  | 0.11047900  |
| H | -6.28291300 | 1.93087900  | 1.66475800  |
| H | -7.11660100 | 0.42860000  | 2.12850300  |
| H | -7.25275600 | 1.04447900  | 0.46464500  |
| H | -4.09846100 | 0.97731000  | 2.49576500  |
| H | -3.45107000 | -0.54147300 | 1.84005300  |
| H | -4.85617100 | -0.57173900 | 2.93135400  |
| C | -2.60047400 | 0.50297900  | -1.12208500 |
| C | -1.45172400 | 1.24932000  | -0.46283800 |
| H | -1.52620200 | 2.28775800  | -0.80684200 |
| H | -1.61012600 | 1.23590700  | 0.62806300  |
| C | -0.08721100 | 0.65185300  | -0.81538200 |
| H | -0.08096100 | -0.41756400 | -0.54758300 |
| H | 0.04448800  | 0.70693500  | -1.91030000 |
| H | -2.08427800 | -1.15298600 | -0.04852700 |
| O | -3.34658100 | 1.04118600  | -1.92699700 |
| H | -4.36435700 | -1.11985800 | -1.94838600 |
| H | -3.30921300 | -2.53024200 | -1.73588800 |
| C | 1.11521800  | 1.33284800  | -0.13415100 |
| C | 1.08667300  | 2.84661100  | -0.37111100 |

|   |            |             |             |
|---|------------|-------------|-------------|
| H | 0.98412100 | 3.07699000  | -1.44340200 |
| H | 0.24283400 | 3.30659600  | 0.16240900  |
| H | 2.01343600 | 3.30901400  | -0.00579000 |
| C | 1.14391200 | 1.03729800  | 1.36531300  |
| H | 1.20949500 | -0.04479700 | 1.55711100  |
| H | 2.00701600 | 1.52744500  | 1.84004600  |
| H | 0.23473800 | 1.41627400  | 1.85420500  |
| C | 2.40939600 | 0.79647900  | -0.80593300 |
| N | 3.59956500 | 1.31843000  | -0.23070800 |
| C | 4.47280100 | 0.38837000  | 0.12154300  |
| C | 4.09759500 | -0.98611400 | -0.10199900 |
| S | 2.51609400 | -1.08154300 | -0.80036000 |
| C | 5.74738100 | 0.65966500  | 0.70489700  |
| C | 6.58263500 | -0.38668900 | 1.03122400  |
| C | 6.19357700 | -1.72536400 | 0.79847200  |
| C | 4.95575700 | -2.03073300 | 0.23425900  |
| H | 2.36579400 | 1.08037300  | -1.87458700 |
| H | 6.03101400 | 1.69893000  | 0.87631300  |
| H | 7.55864300 | -0.18417100 | 1.47494600  |
| H | 6.87332300 | -2.53600200 | 1.06514400  |
| H | 4.66637500 | -3.06821900 | 0.06125100  |

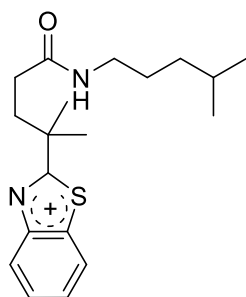

**E-2**

|                                 |                             |
|---------------------------------|-----------------------------|
| Zero-point correction=          | 0.454077 (Hartree/Particle) |
| Thermal correction to Energy=   | 0.477639                    |
| Thermal correction to Enthalpy= | 0.478583                    |



|                                              |             |             |              |
|----------------------------------------------|-------------|-------------|--------------|
| Thermal correction to Gibbs Free Energy=     |             |             | 0.399964     |
| Sum of electronic and zero-point Energies=   |             |             | -1322.548521 |
| Sum of electronic and thermal Energies=      |             |             | -1322.524959 |
| Sum of electronic and thermal Enthalpies=    |             |             | -1322.524015 |
| Sum of electronic and thermal Free Energies= |             |             | -1322.602634 |
| N                                            | -2.73269400 | -0.83412700 | -0.69559000  |
| C                                            | -3.77700900 | -1.73390600 | -1.14645200  |
| C                                            | -4.70729400 | -2.19932100 | -0.02479500  |
| C                                            | -5.79784900 | -1.20617800 | 0.38049600   |
| C                                            | -5.34745700 | 0.16946600  | 0.88822100   |
| C                                            | -6.57229400 | 1.01753600  | 1.22620800   |
| C                                            | -4.42185400 | 0.06677500  | 2.09851600   |
| H                                            | -4.09615900 | -2.48789800 | 0.84743800   |
| H                                            | -5.19981500 | -3.12381500 | -0.36413100  |
| H                                            | -6.42037100 | -1.67374400 | 1.16455100   |
| H                                            | -6.46500200 | -1.05247100 | -0.48546800  |
| H                                            | -4.80870900 | 0.67767200  | 0.07119000   |
| H                                            | -6.28286800 | 2.02899800  | 1.54983800   |
| H                                            | -7.15148100 | 0.55638800  | 2.04327500   |
| H                                            | -7.24078500 | 1.11924600  | 0.35751600   |
| H                                            | -4.13188000 | 1.06582400  | 2.45956000   |
| H                                            | -3.49958100 | -0.48660800 | 1.87049600   |
| H                                            | -4.92865500 | -0.45355600 | 2.92891700   |
| C                                            | -2.58420300 | 0.44010400  | -1.12723100  |
| C                                            | -1.44193900 | 1.20619400  | -0.47685600  |
| H                                            | -1.50894500 | 2.23267400  | -0.85539100  |
| H                                            | -1.60959700 | 1.22512400  | 0.61215000   |
| C                                            | -0.07783700 | 0.59327800  | -0.80186400  |
| H                                            | -0.07722100 | -0.46238300 | -0.48230800  |
| H                                            | 0.05610900  | 0.60193100  | -1.89708700  |

|   |             |             |             |
|---|-------------|-------------|-------------|
| H | -2.10871400 | -1.17137600 | 0.03066000  |
| O | -3.30678600 | 0.95135500  | -1.96943800 |
| H | -4.34190100 | -1.20160700 | -1.92424800 |
| H | -3.31002800 | -2.61250700 | -1.61902300 |
| C | 1.11441200  | 1.31441700  | -0.14349100 |
| C | 1.09847800  | 2.81227800  | -0.46084100 |
| H | 0.99933500  | 2.98710200  | -1.54285900 |
| H | 0.25109400  | 3.29051400  | 0.04878600  |
| H | 2.01998300  | 3.29533400  | -0.11024700 |
| C | 1.14792200  | 1.08817500  | 1.36786500  |
| H | 1.18802000  | 0.01715100  | 1.61958800  |
| H | 2.01523700  | 1.59015900  | 1.82169100  |
| H | 0.24408500  | 1.50828800  | 1.83058200  |
| C | 2.41556200  | 0.73969600  | -0.78898800 |
| N | 3.60001800  | 1.28001400  | -0.26740900 |
| C | 4.47301000  | 0.40894600  | 0.10181400  |
| C | 4.07835900  | -1.00353400 | -0.07512700 |
| S | 2.53325700  | -1.11401100 | -0.71474900 |
| C | 5.77442800  | 0.72325200  | 0.65451800  |
| C | 6.59368000  | -0.30371200 | 0.98778600  |
| C | 6.18252000  | -1.67271600 | 0.79802000  |
| C | 4.96174300  | -2.03785700 | 0.27765400  |
| H | 2.38305600  | 0.97062800  | -1.87435200 |
| H | 6.04706800  | 1.77135700  | 0.77851100  |
| H | 7.58220000  | -0.11297500 | 1.40544700  |
| H | 6.88284800  | -2.45976300 | 1.08482500  |
| H | 4.68932100  | -3.08491800 | 0.14984800  |

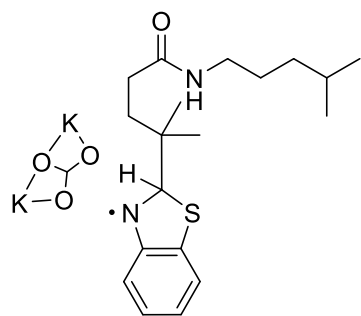

**Complex 2-2**

|                                              |             |             |                             |
|----------------------------------------------|-------------|-------------|-----------------------------|
| Zero-point correction=                       |             |             | 0.471757 (Hartree/Particle) |
| Thermal correction to Energy=                |             |             | 0.504390                    |
| Thermal correction to Enthalpy=              |             |             | 0.505334                    |
| Thermal correction to Gibbs Free Energy=     |             |             | 0.402776                    |
| Sum of electronic and zero-point Energies=   |             |             | -2786.100555                |
| Sum of electronic and thermal Energies=      |             |             | -2786.067922                |
| Sum of electronic and thermal Enthalpies=    |             |             | -2786.066978                |
| Sum of electronic and thermal Free Energies= |             |             | -2786.169536                |
| N                                            | -3.82374700 | -2.11228700 | -0.80173900                 |
| C                                            | -5.17835400 | -1.69192500 | -1.11212400                 |
| C                                            | -6.00270600 | -1.33929300 | 0.13059300                  |
| C                                            | -5.85094800 | 0.10192600  | 0.61461800                  |
| C                                            | -4.43444100 | 0.56377300  | 0.96508800                  |
| C                                            | -4.42683600 | 2.06137500  | 1.27138600                  |
| C                                            | -3.80243000 | -0.21250100 | 2.11754200                  |
| H                                            | -5.75386200 | -2.05342100 | 0.93357900                  |
| H                                            | -7.06339000 | -1.51122800 | -0.10772400                 |
| H                                            | -6.49799700 | 0.25437200  | 1.49679500                  |
| H                                            | -6.24595200 | 0.76883100  | -0.17193900                 |
| H                                            | -3.79429800 | 0.38258700  | 0.08692300                  |
| H                                            | -3.40214600 | 2.39988000  | 1.48827600                  |
| H                                            | -5.05858900 | 2.27647900  | 2.14929900                  |
| H                                            | -4.83747300 | 2.65032600  | 0.43292900                  |
| H                                            | -2.78927400 | 0.18031400  | 2.29696400                  |

|   |             |             |             |
|---|-------------|-------------|-------------|
| H | -3.72235600 | -1.28748200 | 1.89292000  |
| H | -4.39505300 | -0.10114200 | 3.04157900  |
| C | -2.70157900 | -1.50915900 | -1.21503800 |
| C | -1.41538500 | -2.19854000 | -0.81333200 |
| H | -1.62209700 | -2.90663200 | 0.00152600  |
| H | -1.09491400 | -2.79894800 | -1.68052500 |
| C | -0.32599500 | -1.19872200 | -0.42552300 |
| H | 0.05246200  | -0.73161900 | -1.35047300 |
| H | -0.75395600 | -0.38189400 | 0.18275600  |
| H | -3.72114900 | -2.97030700 | -0.26834500 |
| O | -2.70041700 | -0.47770200 | -1.86976300 |
| H | -5.10806700 | -0.83401900 | -1.79551500 |
| H | -5.67220700 | -2.51021400 | -1.65777600 |
| C | 0.84373000  | -1.82840700 | 0.35647300  |
| C | 0.39410900  | -2.16076700 | 1.78552100  |
| H | 0.12575900  | -1.24284300 | 2.33154800  |
| H | -0.48431100 | -2.82243600 | 1.77592200  |
| H | 1.19672000  | -2.66635200 | 2.33932300  |
| C | 1.37891400  | -3.08596000 | -0.33016600 |
| H | 1.58527000  | -2.90700800 | -1.39653300 |
| H | 2.31168700  | -3.41805200 | 0.15161100  |
| H | 0.65352400  | -3.90942100 | -0.25497300 |
| C | 1.95947800  | -0.76594700 | 0.49079800  |
| N | 3.05877600  | -1.17364200 | 1.28513700  |
| C | 4.24210300  | -0.90732700 | 0.74775500  |
| C | 4.24923700  | -0.34584500 | -0.57876800 |
| S | 2.62568000  | -0.18698700 | -1.18138900 |
| C | 5.49242000  | -1.14207600 | 1.39179400  |
| C | 6.66534400  | -0.81411600 | 0.74333100  |
| C | 6.64579200  | -0.25432300 | -0.55216600 |

|   |             |             |             |
|---|-------------|-------------|-------------|
| C | 5.44216400  | -0.01977900 | -1.21871200 |
| H | 1.51480100  | 0.15544200  | 0.94232500  |
| H | 5.49008200  | -1.57161200 | 2.39447700  |
| H | 7.62326700  | -0.98567400 | 1.23678600  |
| H | 7.58652300  | -0.00286000 | -1.04419300 |
| H | 5.43898700  | 0.40479000  | -2.22391800 |
| C | -0.05014800 | 2.15540500  | 0.68648200  |
| O | 0.98984200  | 2.01124200  | 1.42943500  |
| O | -1.19457000 | 1.72533400  | 1.05951800  |
| O | 0.06986300  | 2.73666000  | -0.47621700 |
| K | 2.56850600  | 2.92431100  | -0.31181400 |
| K | -2.26759200 | 2.00844800  | -1.22409600 |

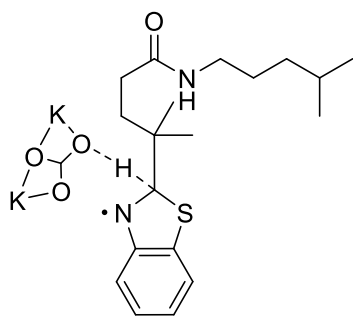

**TS9**

|                                              |             |             |                             |
|----------------------------------------------|-------------|-------------|-----------------------------|
| Zero-point correction=                       |             |             | 0.466683 (Hartree/Particle) |
| Thermal correction to Energy=                |             |             | 0.498739                    |
| Thermal correction to Enthalpy=              |             |             | 0.499683                    |
| Thermal correction to Gibbs Free Energy=     |             |             | 0.401236                    |
| Sum of electronic and zero-point Energies=   |             |             | -2786.100376                |
| Sum of electronic and thermal Energies=      |             |             | -2786.068320                |
| Sum of electronic and thermal Enthalpies=    |             |             | -2786.067376                |
| Sum of electronic and thermal Free Energies= |             |             | -2786.165823                |
| N                                            | -4.02354100 | -1.79848800 | -1.13540700                 |
| C                                            | -5.21084700 | -1.13438100 | -1.64116700                 |
| C                                            | -6.12611300 | -0.58644300 | -0.54578100                 |
| C                                            | -5.62775600 | 0.65956100  | 0.19069900                  |

|   |             |             |             |
|---|-------------|-------------|-------------|
| C | -4.38876400 | 0.52897100  | 1.09025700  |
| C | -4.13076400 | 1.85092100  | 1.81521000  |
| C | -4.50687100 | -0.61431700 | 2.09495600  |
| H | -6.35406400 | -1.39355700 | 0.17038100  |
| H | -7.08369600 | -0.33262500 | -1.02700500 |
| H | -6.45317900 | 1.03129300  | 0.82372300  |
| H | -5.44237100 | 1.45583100  | -0.55358800 |
| H | -3.50759900 | 0.31954800  | 0.46315800  |
| H | -3.14334400 | 1.84814200  | 2.29877000  |
| H | -4.90208500 | 2.02797700  | 2.58251100  |
| H | -4.17569400 | 2.71266100  | 1.12654000  |
| H | -3.63750300 | -0.63094300 | 2.77050500  |
| H | -4.56398100 | -1.59386200 | 1.59816200  |
| H | -5.41138000 | -0.49470800 | 2.71467300  |
| C | -2.78530100 | -1.27868600 | -1.18288900 |
| C | -1.72987500 | -2.06987600 | -0.42900200 |
| H | -2.08599200 | -2.12633600 | 0.61276700  |
| H | -1.72402100 | -3.10309800 | -0.81147600 |
| C | -0.36023400 | -1.41365600 | -0.49800500 |
| H | -0.00218700 | -1.45480600 | -1.54021400 |
| H | -0.48729600 | -0.35560300 | -0.22812500 |
| H | -4.14986200 | -2.67060900 | -0.63021800 |
| O | -2.53595000 | -0.21124000 | -1.74622400 |
| H | -4.87495000 | -0.32316600 | -2.30119500 |
| H | -5.77163700 | -1.85292400 | -2.25713600 |
| C | 0.70978100  | -2.00038800 | 0.44141900  |
| C | 0.20185200  | -2.00249200 | 1.89000300  |
| H | -0.21065500 | -1.01022800 | 2.13506000  |
| H | -0.57520000 | -2.76629600 | 2.04246400  |
| H | 1.02974200  | -2.22204300 | 2.57936900  |

|   |             |             |             |
|---|-------------|-------------|-------------|
| C | 1.12261300  | -3.40907200 | 0.00900100  |
| H | 1.52976800  | -3.39858800 | -1.01467300 |
| H | 1.89939200  | -3.80428400 | 0.68103000  |
| H | 0.26636600  | -4.10109900 | 0.03164000  |
| C | 1.92437400  | -1.05812100 | 0.41692800  |
| N | 3.03422800  | -1.40285900 | 1.15409600  |
| C | 4.17803400  | -0.92687500 | 0.63179900  |
| C | 4.10038600  | -0.38044800 | -0.69156600 |
| S | 2.47083600  | -0.52480100 | -1.30296400 |
| C | 5.43736400  | -0.91884100 | 1.28202500  |
| C | 6.54280800  | -0.37761900 | 0.64200700  |
| C | 6.44250700  | 0.16438500  | -0.65066200 |
| C | 5.21823600  | 0.16031000  | -1.32619400 |
| H | 1.57547700  | 0.08194700  | 0.90747400  |
| H | 5.51098800  | -1.33328200 | 2.28888800  |
| H | 7.50678400  | -0.36606100 | 1.15421100  |
| H | 7.32426900  | 0.58607700  | -1.13521100 |
| H | 5.14394700  | 0.56531700  | -2.33840800 |
| C | 0.28392700  | 1.85414100  | 0.84304300  |
| O | 1.43408300  | 1.37397300  | 1.28367200  |
| O | -0.80331900 | 1.38486200  | 1.27359900  |
| O | 0.33116300  | 2.77658500  | -0.05006100 |
| K | 2.85221300  | 2.59866500  | -0.46474600 |
| K | -2.06369700 | 2.17163400  | -0.84093000 |

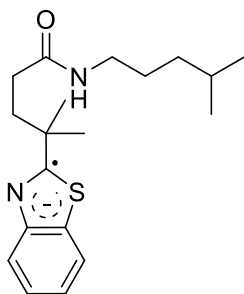

**D-2**

|                                              |             |             |                             |
|----------------------------------------------|-------------|-------------|-----------------------------|
| Zero-point correction=                       |             |             | 0.439897 (Hartree/Particle) |
| Thermal correction to Energy=                |             |             | 0.464150                    |
| Thermal correction to Enthalpy=              |             |             | 0.465094                    |
| Thermal correction to Gibbs Free Energy=     |             |             | 0.384234                    |
| Sum of electronic and zero-point Energies=   |             |             | -1322.254105                |
| Sum of electronic and thermal Energies=      |             |             | -1322.229852                |
| Sum of electronic and thermal Enthalpies=    |             |             | -1322.228908                |
| Sum of electronic and thermal Free Energies= |             |             | -1322.309768                |
| N                                            | -3.97536400 | -1.00249800 | 0.20509100                  |
| C                                            | -5.12152300 | -0.13746600 | 0.00592900                  |
| C                                            | -5.06870800 | 1.16295500  | 0.80902700                  |
| C                                            | -4.14861700 | 2.25078200  | 0.25168700                  |
| C                                            | -2.64337500 | 1.95577900  | 0.21163700                  |
| C                                            | -1.89532900 | 3.15291100  | -0.37159600                 |
| C                                            | -2.09141500 | 1.60439100  | 1.59186600                  |
| H                                            | -4.80924400 | 0.92950000  | 1.85568200                  |
| H                                            | -6.09231700 | 1.56851900  | 0.83813300                  |
| H                                            | -4.29561800 | 3.16769400  | 0.85073700                  |
| H                                            | -4.48382900 | 2.49899900  | -0.77053400                 |
| H                                            | -2.47549300 | 1.10106300  | -0.46504300                 |
| H                                            | -0.82099300 | 2.93670400  | -0.47449900                 |
| H                                            | -2.00136900 | 4.03585400  | 0.28033500                  |
| H                                            | -2.28272300 | 3.42183300  | -1.36640700                 |
| H                                            | -0.99535100 | 1.49457900  | 1.56580700                  |
| H                                            | -2.51069100 | 0.66169800  | 1.97497800                  |
| H                                            | -2.33013300 | 2.40076000  | 2.31709300                  |
| C                                            | -3.12718400 | -1.37097500 | -0.78469300                 |
| C                                            | -1.93372900 | -2.19285600 | -0.33713300                 |
| H                                            | -2.12764600 | -2.65749500 | 0.63991200                  |
| H                                            | -1.77826100 | -2.98868900 | -1.07987000                 |



|   |             |             |             |
|---|-------------|-------------|-------------|
| C | -0.72048600 | -1.26122200 | -0.27179000 |
| H | -0.58738200 | -0.81397200 | -1.27166300 |
| H | -0.95865200 | -0.43469300 | 0.41614800  |
| H | -3.80118900 | -1.35159300 | 1.14152200  |
| O | -3.25769100 | -1.01185400 | -1.94635500 |
| H | -5.17093100 | 0.07664100  | -1.07071900 |
| H | -6.03572800 | -0.69033500 | 0.27529800  |
| C | 0.60902700  | -1.88476200 | 0.18603200  |
| C | 0.43198400  | -2.59830700 | 1.53187200  |
| H | -0.04208000 | -1.92940700 | 2.26852500  |
| H | -0.18813700 | -3.50168900 | 1.42958100  |
| H | 1.41186600  | -2.89735500 | 1.92868500  |
| C | 1.12054800  | -2.88980300 | -0.86003900 |
| H | 1.27176900  | -2.39024600 | -1.83012100 |
| H | 2.08833000  | -3.30444900 | -0.53772800 |
| H | 0.42171300  | -3.72906600 | -1.00790300 |
| C | 1.62435700  | -0.76834900 | 0.37470100  |
| N | 2.83628700  | -1.01037600 | 0.93019800  |
| C | 3.78931000  | -0.15984900 | 0.53313700  |
| C | 3.42067000  | 0.78457100  | -0.49258200 |
| S | 1.74338400  | 0.50788900  | -0.93675400 |
| C | 5.12553900  | -0.08560700 | 1.02704500  |
| C | 6.00984700  | 0.86011100  | 0.51449200  |
| C | 5.62901600  | 1.76362200  | -0.48657800 |
| C | 4.31188300  | 1.71816600  | -0.99409700 |
| H | 5.43712200  | -0.78145700 | 1.80913600  |
| H | 7.02903200  | 0.89841100  | 0.90888900  |
| H | 6.33838900  | 2.49761100  | -0.87151600 |
| H | 3.99958600  | 2.41477300  | -1.77607400 |

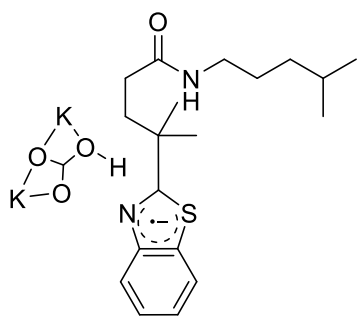

**Complex 3-2**

|                                              |             |             |                             |
|----------------------------------------------|-------------|-------------|-----------------------------|
| Zero-point correction=                       |             |             | 0.471086 (Hartree/Particle) |
| Thermal correction to Energy=                |             |             | 0.503931                    |
| Thermal correction to Enthalpy=              |             |             | 0.504875                    |
| Thermal correction to Gibbs Free Energy=     |             |             | 0.405471                    |
| Sum of electronic and zero-point Energies=   |             |             | -2786.116889                |
| Sum of electronic and thermal Energies=      |             |             | -2786.084044                |
| Sum of electronic and thermal Enthalpies=    |             |             | -2786.083100                |
| Sum of electronic and thermal Free Energies= |             |             | -2786.182504                |
| N                                            | -4.51683300 | -1.45343600 | -0.32591900                 |
| C                                            | -5.59563900 | -0.64308900 | -0.86492000                 |
| C                                            | -6.11889200 | 0.40887200  | 0.11812100                  |
| C                                            | -5.33175400 | 1.72027800  | 0.15213500                  |
| C                                            | -3.84391600 | 1.62880800  | 0.50801000                  |
| C                                            | -3.19141100 | 3.00702300  | 0.40349000                  |
| C                                            | -3.59801400 | 1.02381700  | 1.88822300                  |
| H                                            | -6.17609700 | -0.04229900 | 1.12300700                  |
| H                                            | -7.15645300 | 0.64260500  | -0.16564700                 |
| H                                            | -5.81738400 | 2.40473600  | 0.87042500                  |
| H                                            | -5.42209500 | 2.20193200  | -0.83726100                 |
| H                                            | -3.36926400 | 0.97181700  | -0.23953400                 |
| H                                            | -2.11785100 | 2.94872900  | 0.64202900                  |
| H                                            | -3.65491200 | 3.70905100  | 1.11647500                  |
| H                                            | -3.31256100 | 3.43797000  | -0.60396700                 |
| H                                            | -2.51851400 | 1.00431800  | 2.10183100                  |

|   |             |             |             |
|---|-------------|-------------|-------------|
| H | -3.98251800 | -0.00475700 | 1.96075400  |
| H | -4.09507200 | 1.62525100  | 2.66855700  |
| C | -3.25981300 | -1.47508000 | -0.79298100 |
| C | -2.29159400 | -2.39270500 | -0.06058200 |
| H | -2.66111800 | -2.59017400 | 0.95648800  |
| H | -2.26966500 | -3.35510400 | -0.59763700 |
| C | -0.92375600 | -1.72437300 | -0.06550300 |
| H | -0.63069500 | -1.64654800 | -1.12516300 |
| H | -1.02934300 | -0.70625100 | 0.33865000  |
| H | -4.73219000 | -2.04727200 | 0.46919600  |
| O | -2.88370100 | -0.77288300 | -1.73676000 |
| H | -5.21859800 | -0.16826800 | -1.78105500 |
| H | -6.41703500 | -1.31631200 | -1.15248200 |
| C | 0.23874700  | -2.36289900 | 0.71241100  |
| C | -0.03128400 | -2.28075600 | 2.21757500  |
| H | -0.18794700 | -1.23241700 | 2.51687100  |
| H | -0.92654900 | -2.86178800 | 2.48660400  |
| H | 0.82011600  | -2.67835900 | 2.78753100  |
| C | 0.43908300  | -3.83038900 | 0.29719300  |
| H | 0.60799100  | -3.91046400 | -0.78850900 |
| H | 1.31670100  | -4.25335200 | 0.81024400  |
| H | -0.43648800 | -4.44750300 | 0.55640500  |
| C | 1.46926900  | -1.54028600 | 0.39898500  |
| N | 2.52608200  | -1.36227900 | 1.20309300  |
| C | 3.59288300  | -0.84829100 | 0.58157400  |
| C | 3.46950000  | -0.65342400 | -0.84620300 |
| S | 1.85770000  | -1.15655700 | -1.33691400 |
| C | 4.81951500  | -0.41091200 | 1.18480000  |
| C | 5.83769300  | 0.10965100  | 0.39096500  |
| C | 5.70870200  | 0.24895100  | -1.00299300 |

|   |             |             |             |
|---|-------------|-------------|-------------|
| C | 4.49363700  | -0.14624500 | -1.62605700 |
| H | 1.65803200  | 0.64703600  | 2.03445100  |
| H | 4.94201500  | -0.50309900 | 2.26565800  |
| H | 6.76691000  | 0.42741400  | 0.87163700  |
| H | 6.52816100  | 0.64759900  | -1.60144400 |
| H | 4.36449700  | -0.03261100 | -2.70498400 |
| C | 0.75981800  | 1.74080000  | 0.73952900  |
| O | 1.82699000  | 1.48777200  | 1.57630900  |
| O | -0.33963600 | 1.25997100  | 1.04549900  |
| O | 1.04402300  | 2.44185100  | -0.25846900 |
| K | 3.67333400  | 2.31653000  | -0.07227600 |
| K | -0.92059900 | 1.07983100  | -1.54582800 |

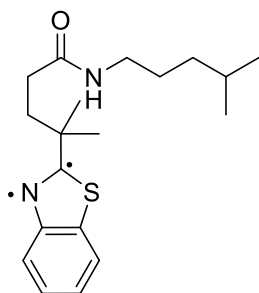

**F-2**

|                                              |             |             |                             |
|----------------------------------------------|-------------|-------------|-----------------------------|
| Zero-point correction=                       |             |             | 0.439740 (Hartree/Particle) |
| Thermal correction to Energy=                |             |             | 0.463934                    |
| Thermal correction to Enthalpy=              |             |             | 0.464879                    |
| Thermal correction to Gibbs Free Energy=     |             |             | 0.385563                    |
| Sum of electronic and zero-point Energies=   |             |             | -1322.077031                |
| Sum of electronic and thermal Energies=      |             |             | -1322.052836                |
| Sum of electronic and thermal Enthalpies=    |             |             | -1322.051892                |
| Sum of electronic and thermal Free Energies= |             |             | -1322.131208                |
| N                                            | -3.54346600 | -0.81350300 | 0.18013700                  |
| C                                            | -4.51097900 | 0.19043200  | -0.21899900                 |
| C                                            | -4.27899600 | 1.56465700  | 0.41175800                  |
| C                                            | -3.12917400 | 2.38330400  | -0.17959100                 |

|   |             |             |             |
|---|-------------|-------------|-------------|
| C | -1.71309500 | 1.81226500  | -0.03218500 |
| C | -0.68889700 | 2.75958700  | -0.65326300 |
| C | -1.35960200 | 1.53069000  | 1.42691900  |
| H | -4.14977400 | 1.44261000  | 1.50064400  |
| H | -5.20862200 | 2.14125300  | 0.28319600  |
| H | -3.14134200 | 3.38447700  | 0.28805200  |
| H | -3.33138900 | 2.54572000  | -1.25266200 |
| H | -1.66404600 | 0.87016100  | -0.60122200 |
| H | 0.31273900  | 2.30114300  | -0.66076500 |
| H | -0.62430400 | 3.70208000  | -0.08344100 |
| H | -0.95181400 | 3.01047100  | -1.69276900 |
| H | -0.30361100 | 1.23500400  | 1.53163600  |
| H | -1.97424400 | 0.72358800  | 1.85268700  |
| H | -1.51295400 | 2.43402200  | 2.04159500  |
| C | -2.67501800 | -1.40312100 | -0.67369500 |
| C | -1.65748600 | -2.32758900 | -0.03013400 |
| H | -1.93701900 | -2.55328000 | 1.00848500  |
| H | -1.65356300 | -3.26598100 | -0.60413200 |
| C | -0.28614800 | -1.65031700 | -0.10073600 |
| H | -0.08092600 | -1.38945100 | -1.15156300 |
| H | -0.33751900 | -0.70521900 | 0.46357700  |
| H | -3.49428300 | -1.06343900 | 1.16199800  |
| O | -2.65181300 | -1.17059400 | -1.87399500 |
| H | -4.46319900 | 0.25697300  | -1.31472700 |
| H | -5.51938100 | -0.16251000 | 0.04853700  |
| C | 0.90566000  | -2.47060900 | 0.44443600  |
| C | 0.64719300  | -2.92365500 | 1.88847200  |
| H | 0.35161200  | -2.07699400 | 2.52443700  |
| H | -0.15009300 | -3.68030800 | 1.91422100  |
| H | 1.55499600  | -3.37395100 | 2.31832300  |

|   |            |             |             |
|---|------------|-------------|-------------|
| C | 1.17964600 | -3.69248500 | -0.43656700 |
| H | 1.33065700 | -3.40520600 | -1.48886000 |
| H | 2.07706200 | -4.22684000 | -0.08895800 |
| H | 0.33346200 | -4.39376900 | -0.39891800 |
| C | 2.11742100 | -1.56538600 | 0.44910900  |
| N | 2.11683900 | -0.46482100 | 1.35480200  |
| C | 2.43356700 | 0.65456100  | 0.77039800  |
| C | 2.83268000 | 0.57947500  | -0.63595000 |
| S | 2.87540600 | -1.10726500 | -1.13423400 |
| C | 2.43804400 | 1.95151000  | 1.40763600  |
| C | 2.78465300 | 3.06262800  | 0.67645100  |
| C | 3.13111600 | 2.95716100  | -0.69056500 |
| C | 3.15090000 | 1.70657200  | -1.35175400 |
| H | 2.15963900 | 2.01365800  | 2.46031000  |
| H | 2.78861400 | 4.04514000  | 1.15055600  |
| H | 3.40972400 | 3.85395500  | -1.24498000 |
| H | 3.44506700 | 1.64787500  | -2.40055900 |

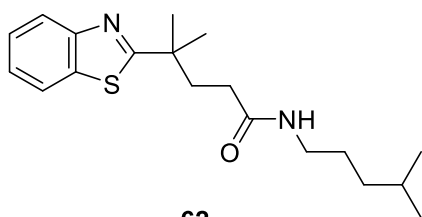

62

|                                              |                             |
|----------------------------------------------|-----------------------------|
| Zero-point correction=                       | 0.443591 (Hartree/Particle) |
| Thermal correction to Energy=                | 0.467508                    |
| Thermal correction to Enthalpy=              | 0.468452                    |
| Thermal correction to Gibbs Free Energy=     | 0.387500                    |
| Sum of electronic and zero-point Energies=   | -1322.193546                |
| Sum of electronic and thermal Energies=      | -1322.169629                |
| Sum of electronic and thermal Enthalpies=    | -1322.168685                |
| Sum of electronic and thermal Free Energies= | -1322.249637                |

|   |             |             |             |
|---|-------------|-------------|-------------|
| N | -2.54193300 | 0.94527600  | 0.59510900  |
| C | -3.44950700 | 1.96746200  | 1.07943600  |
| C | -4.52312700 | 2.36029600  | 0.06244700  |
| C | -5.72439400 | 1.41674200  | -0.02329800 |
| C | -5.44498300 | -0.04752200 | -0.38440900 |
| C | -6.75308500 | -0.83709600 | -0.38796000 |
| C | -4.73588500 | -0.18744500 | -1.72975100 |
| H | -4.04814100 | 2.48150300  | -0.92613000 |
| H | -4.89557600 | 3.35868300  | 0.33988500  |
| H | -6.43623000 | 1.82434400  | -0.76374700 |
| H | -6.25002700 | 1.43810600  | 0.94725200  |
| H | -4.80130300 | -0.47593500 | 0.40190200  |
| H | -6.57656600 | -1.90373400 | -0.59446200 |
| H | -7.43777600 | -0.45418900 | -1.16285100 |
| H | -7.26981500 | -0.76123600 | 0.58116400  |
| H | -4.55983600 | -1.24649000 | -1.97468500 |
| H | -3.76243900 | 0.32360900  | -1.73943000 |
| H | -5.35076000 | 0.24432300  | -2.53756500 |
| C | -2.38819000 | -0.27285200 | 1.16583000  |
| C | -1.41273000 | -1.19521300 | 0.45222400  |
| H | -1.43765000 | -2.14644300 | 0.99747800  |
| H | -1.78955800 | -1.37069400 | -0.56820900 |
| C | 0.00685200  | -0.62824100 | 0.40480000  |
| H | 0.01001600  | 0.32107000  | -0.15501300 |
| H | 0.34009500  | -0.39411100 | 1.42928200  |
| H | -2.02597900 | 1.14604100  | -0.25546500 |
| O | -2.98974500 | -0.62030100 | 2.17140300  |
| H | -3.90813700 | 1.57690400  | 1.99852500  |
| H | -2.86575000 | 2.86018000  | 1.35453600  |
| C | 1.05398500  | -1.57128200 | -0.24010000 |

|   |             |             |             |
|---|-------------|-------------|-------------|
| C | 1.20418200  | -2.86235100 | 0.56850100  |
| H | 1.42428700  | -2.64620000 | 1.62297100  |
| H | 0.27969500  | -3.45336400 | 0.51461600  |
| H | 2.02426400  | -3.47488900 | 0.16659400  |
| C | 0.67429000  | -1.90193300 | -1.68860100 |
| H | 0.46722300  | -0.99195500 | -2.27459400 |
| H | 1.48197800  | -2.45886500 | -2.18627200 |
| H | -0.22970400 | -2.52646100 | -1.71343100 |
| C | 2.37034400  | -0.82245500 | -0.20725700 |
| N | 3.27865100  | -0.96811700 | 0.69361100  |
| C | 4.34181400  | -0.10284700 | 0.50401300  |
| C | 4.22001300  | 0.75103700  | -0.61356800 |
| S | 2.71775800  | 0.41693500  | -1.42344500 |
| C | 5.48447900  | -0.02533900 | 1.31453900  |
| C | 6.47248000  | 0.89502800  | 0.99404800  |
| C | 6.33912400  | 1.73891300  | -0.12347300 |
| C | 5.21572800  | 1.67752700  | -0.93931600 |
| H | 5.57511700  | -0.68618000 | 2.17785400  |
| H | 7.36630800  | 0.96634100  | 1.61569700  |
| H | 7.12991700  | 2.45395300  | -0.35577900 |
| H | 5.11480600  | 2.33242600  | -1.80589100 |
